# Supplementary material
Source: publisher figshare collection journal article supplement (https://acs.figshare.com/ndownloader/files/26906526)

# Supporting Information

## Synthesis of Difluoromethanesulfinate Esters by the Difluoromethanesulfinylation of Alcohols

Yuji Sumii,<sup>†</sup>& Kenta Sasaki,<sup>†</sup>& Okiya Matsubara,<sup>†</sup> and Norio Shibata<sup>\*†,‡,#</sup>

<sup>†</sup>Department of Life Science and Applied Chemistry, <sup>‡</sup>Department of Nanopharmaceutical Sciences, Nagoya Institute of Technology, Gokiso-cho, Showa-ku, Nagoya 466-8555, Japan

<sup>#</sup>Institute of Advanced Fluorine-Containing Materials, Zhejiang Normal University, 688 Yingbin Avenue, 321004 Jinhua, China

&Contributed equally to this work.

\*E-mail: nozshiba@nitech.ac.jp.

### Table of contents

|                                                                                                         |     |
|---------------------------------------------------------------------------------------------------------|-----|
| Table S1.....                                                                                           | S2  |
| Table S2.....                                                                                           | S2  |
| Figure S1.....                                                                                          | S3  |
| Figure S2.....                                                                                          | S4  |
| Figure S3.....                                                                                          | S4  |
| Figure S4.....                                                                                          | S5  |
| General information.....                                                                                | S6  |
| General Procedure for the difluoromethanesulfinylation of alcohols.....                                 | S7  |
| General Procedure for the trifluoromethylsulfinylation of alcohols .....                                | S14 |
| Crystal data collection and structure refinement.....                                                   | S18 |
| References.....                                                                                         | S21 |
| <sup>1</sup> H, <sup>19</sup> F and <sup>13</sup> C NMR spectra of compound <b>2</b> and <b>3</b> ..... | S22 |

**Table S1.** Prediction of log *P*, and p*K*<sub>a</sub> values<sup>a</sup>

| MeOS(O) <sub>x</sub> CF <sub>2</sub> H               | log <i>P</i> | p <i>K</i> <sub>a</sub> (XGBoost/neural network) |
|------------------------------------------------------|--------------|--------------------------------------------------|
| PhCH <sub>2</sub> OSCF <sub>2</sub> H                | 3.0740       | 8.52/8.22                                        |
| PhCH <sub>2</sub> OS(O)CF <sub>2</sub> H             | 2.0895       | 7.91/6.19                                        |
| PhCH <sub>2</sub> OSO <sub>2</sub> CF <sub>2</sub> H | 1.7556       | 8.20/7.03                                        |

<sup>a</sup>Log *P* and p*K*<sub>a</sub> were estimated by the p*K*<sub>a</sub> prediction platform by Luo group.<sup>1</sup>

**Table S2.** Optimization of the Trifluoromethanesulfinylation of **1a**<sup>a</sup>

CF<sub>3</sub>SO<sub>2</sub>Na  
(2 equiv)

1) Ph<sub>2</sub>P(O)Cl (1 equiv)  
30 min, rt, toluene

2) 4-phenyl-1-butanol (**1a**)  
additive, time, rt

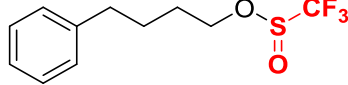

**3a**

| run | additive                         | time | yield (%) <sup>b</sup> |
|-----|----------------------------------|------|------------------------|
| 1   | -                                | 3 h  | 61                     |
| 2   | -                                | 6 h  | 70                     |
| 3   | -                                | 12 h | 76                     |
| 4   | -                                | 24 h | 84                     |
| 5   | Me <sub>3</sub> SiCl (0.1 equiv) | 3 h  | 99 (89 <sup>c</sup> )  |

<sup>a</sup>Ph<sub>2</sub>P(O)Cl (1.0 equiv) was added to a solution of CF<sub>3</sub>SO<sub>2</sub>Na (2.0 equiv) in toluene (1.0 mL) and stirred at rt for 30 min. A solution of 4-phenyl-1-butanol (**1a**, 0.2 mmol) in toluene (1.0 mL) and the desired additive (0.02 mmol, 0.1 equiv) were added separately to the mixture, and stirred at rt. <sup>b</sup>Yields were determined by <sup>19</sup>F NMR spectroscopy using fluorobenzene as an internal standard. <sup>c</sup>Isolated yield.

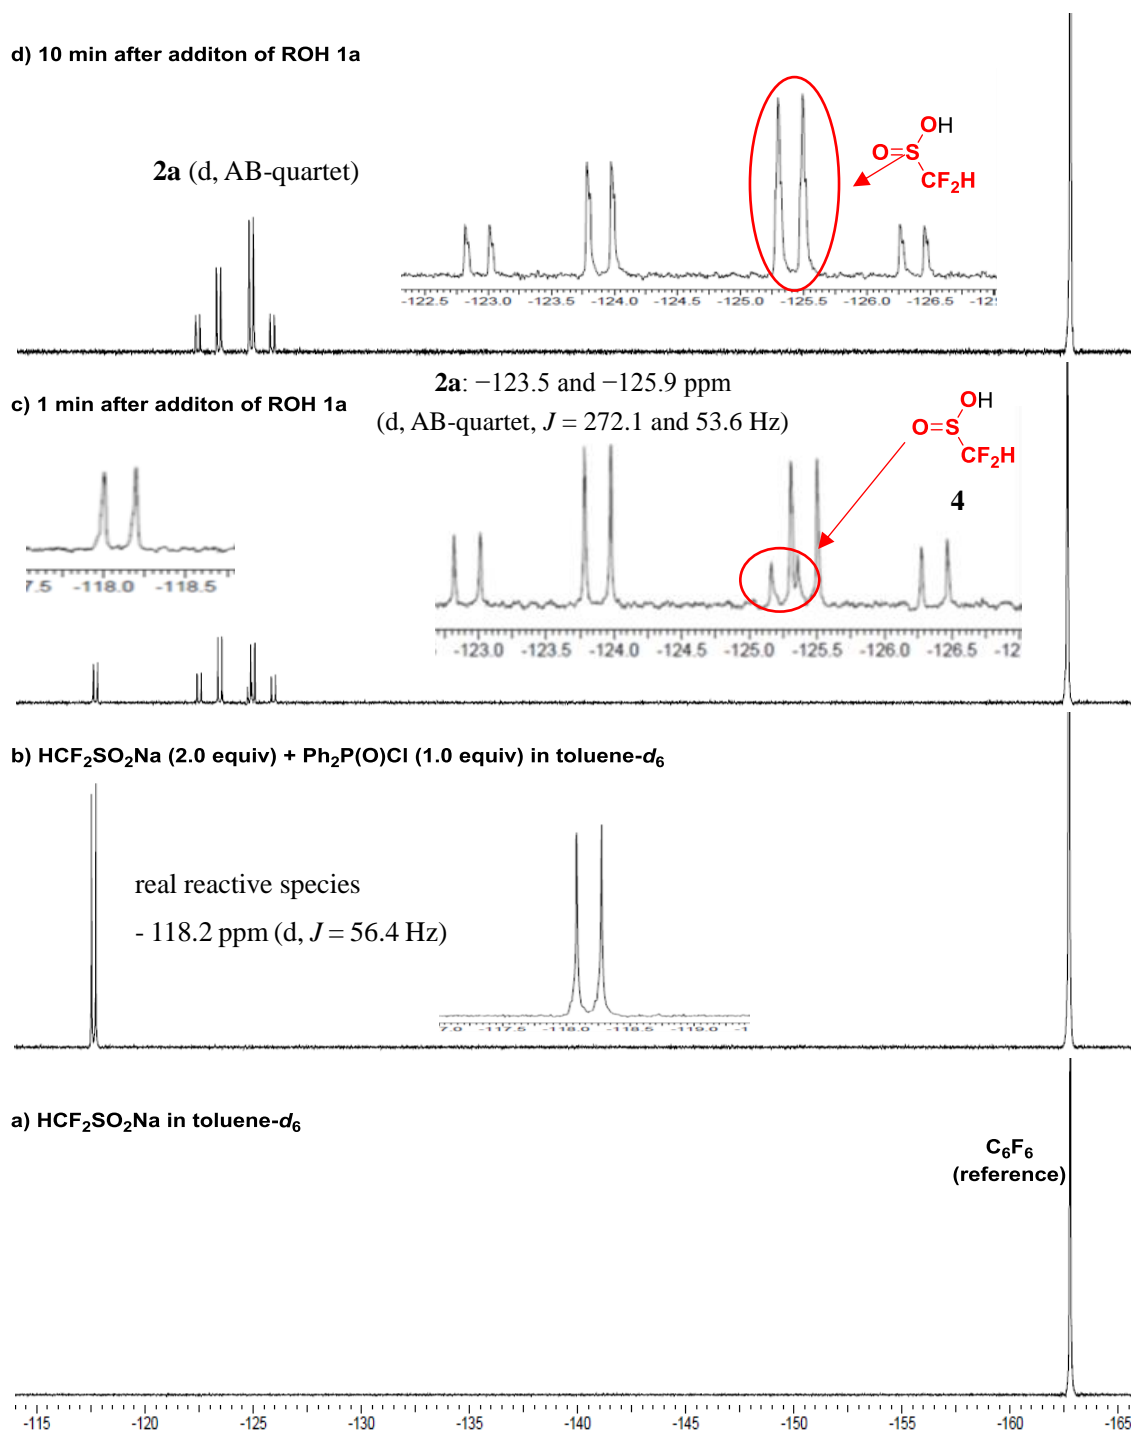

**Figure S1.**  $^{19}\text{F}$  NMR experiments in toluene- $d_6$ . a)  $\text{HCF}_2\text{SO}_2\text{Na}$  (2.0 equiv), b)  $\text{HCF}_2\text{SO}_2\text{Na}$  (2.0 equiv) +  $\text{Ph}_2\text{P}(\text{O})\text{Cl}$  (1.0 equiv), stirred for 30 min, c) 1 min after addition of **1a** to b), d) 10 min after addition of **1a** to b).

b) after additon of 30 min stirring solution of  $\text{HCF}_2\text{SO}_2\text{Na}$  (2.0 equiv) +  $\text{AcOH}$  (2.0 equiv)

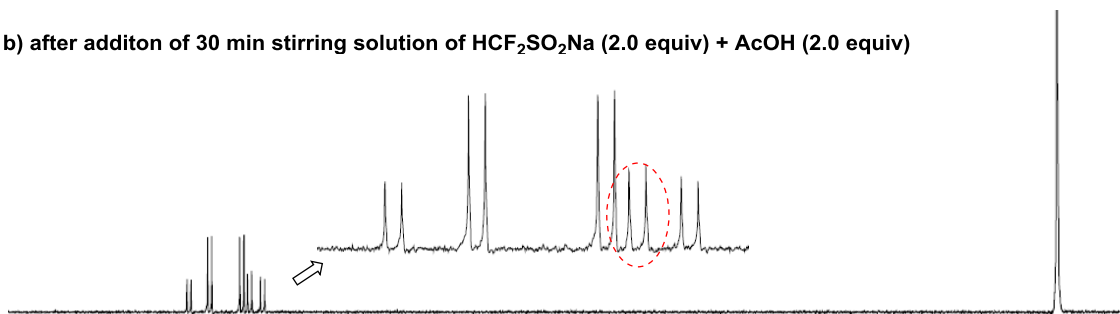

a) 30 min after additon of ROH  $\text{C}_6\text{F}_6$

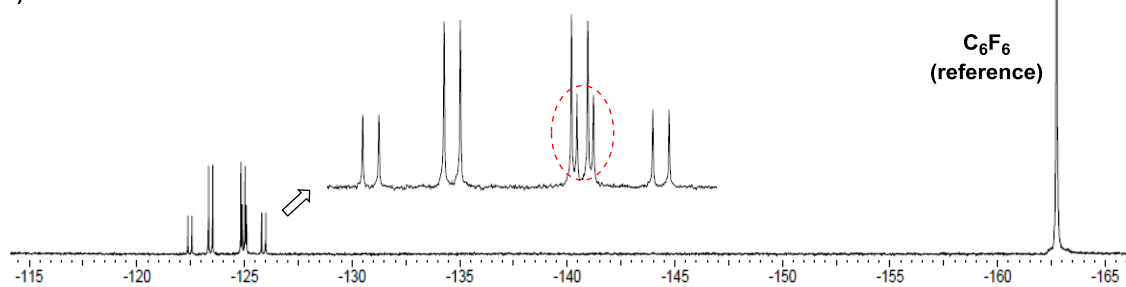

**Figure S2.**  $^{19}\text{F}$  NMR experiments. a)  $\text{HCF}_2\text{SO}_2\text{Na}$  (2.0 equiv) in toluene- $d_6$ , b) 30 min after addition of  $\text{AcOH}$  (2.0 equiv) to  $\text{HCF}_2\text{SO}_2\text{Na}$  (2.0 equiv) in toluene- $d_6$ .

b) 30 min after additon of  $\text{AcOH}$  (2.0 equiv) to  $\text{HCF}_2\text{SO}_2\text{Na}$  in toluene- $d_6$

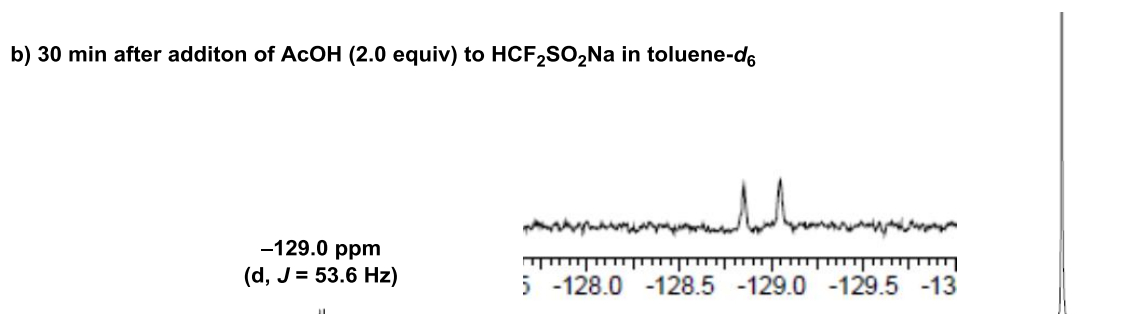

a)  $\text{HCF}_2\text{SO}_2\text{Na}$  in toluene- $d_6$

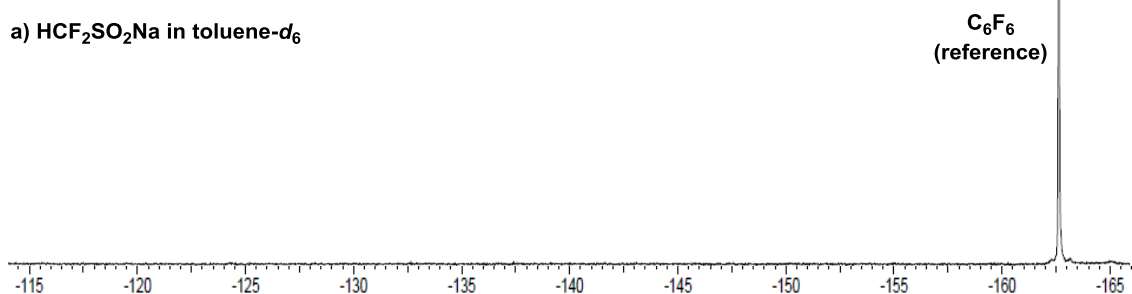

**Figure S3.**  $^{19}\text{F}$  NMR experiments. a)  $\text{HCF}_2\text{SO}_2\text{Na}$  (2.0 equiv) in toluene- $d_6$ , b) 30 min after addition of  $\text{AcOH}$  (2.0 equiv) to  $\text{HCF}_2\text{SO}_2\text{Na}$  (2.0 equiv) in toluene- $d_6$ .

a) LC-MS spectra of intermediate  $\text{Ph}_2\text{P-O-S(O)CF}_2\text{H}$  **II**

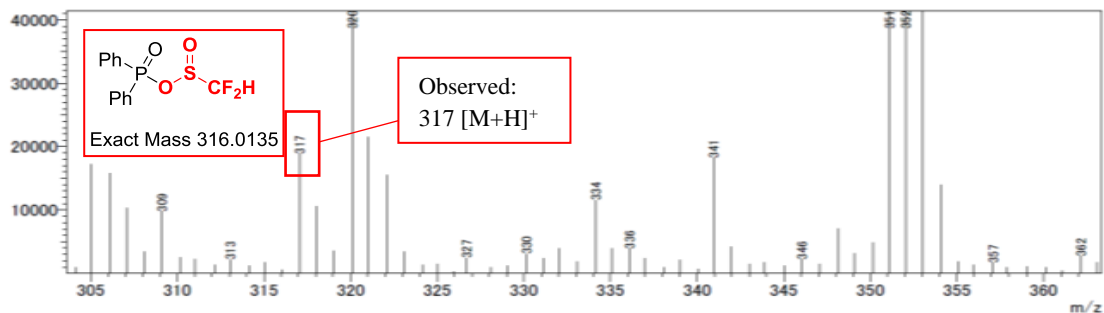

b) LC-MS spectra of  $(\text{HCF}_2\text{S(O)})_2\text{O}$  **III**

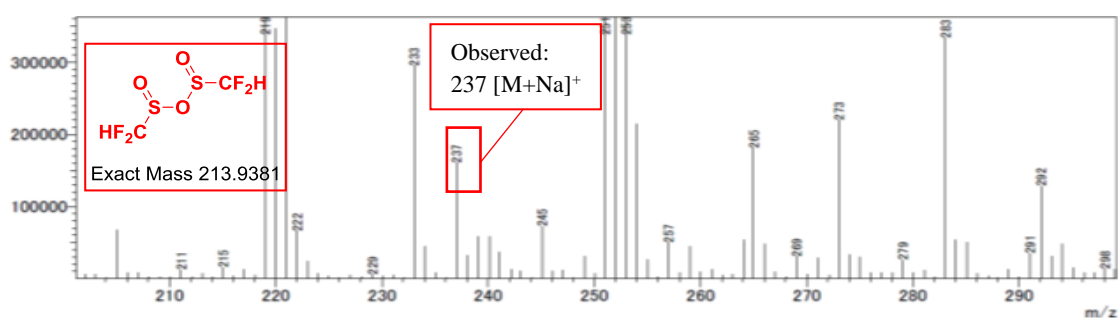

c) LC-MS spectra of  $\text{Ph}_2\text{P(O)OH}$  (positive mode)

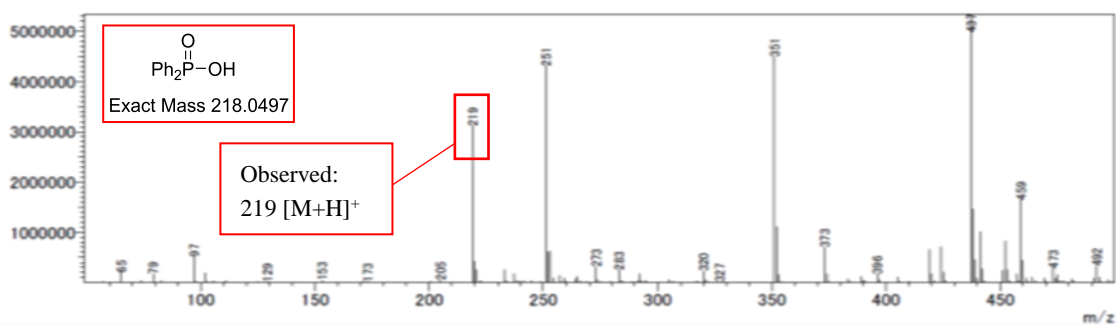

c) LC-MS spectra of  $\text{Ph}_2\text{P(O)OH}$  (negative mode)

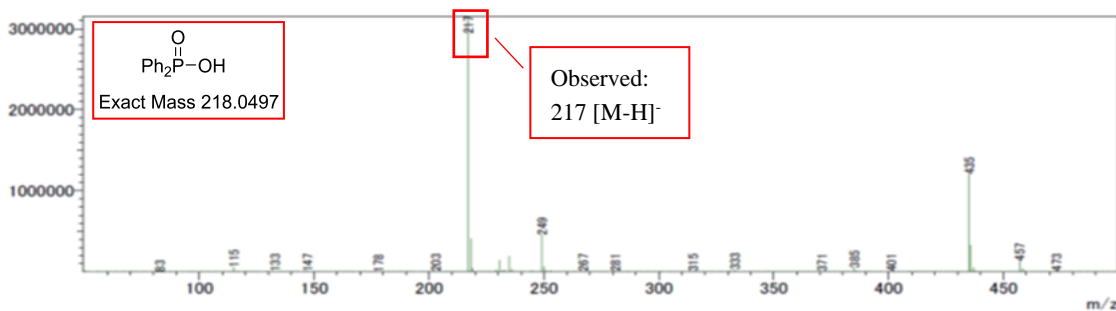

**Figure S4.** LC-MS analysis of reaction intermediates. a) Intermediate  $\text{Ph}_2\text{P-O-S(O)CF}_2\text{H}$  **II**. b)  $(\text{HCF}_2\text{S(O)})_2\text{O}$  **III**. c)  $\text{Ph}_2\text{P(O)OH}$  (positive mode). d)  $\text{Ph}_2\text{P(O)OH}$  (negative mode).

## 1. General information.

All reactions were performed in oven-dried glassware under a positive pressure of nitrogen. Solvents were transferred *via* syringe and were introduced into the reaction vessels through a rubber septum. All solvents were purified by standard method. All of the reactions were monitored by thin-layer chromatography (TLC) carried out on 0.25 mm Merck silica gel (60-F<sub>254</sub>). The TLC plates were visualized with UV light and 7% phosphomolybdic acid or KMnO<sub>4</sub> in water/heat. Column chromatography was carried out on a column packed with silica gel (60N spherical neutral size 50-63  $\mu$ m). The <sup>1</sup>H NMR (300 MHz), <sup>19</sup>F NMR (282 MHz) and <sup>13</sup>C NMR (126 MHz) spectra for solution in CDCl<sub>3</sub> or toluene-*d*<sub>8</sub> were recorded on a Varian Mercury 300 and Bruker Avance 500 NMR spectrometers. Chemical shifts ( $\delta$ ) are expressed in ppm downfield from internal tetramethylsilane (0.0 ppm) for <sup>1</sup>H NMR and C<sub>6</sub>F<sub>6</sub> (−162.2 ppm) for <sup>19</sup>F NMR. UV-vis spectra were recorded on a JASCO V-530 spectrometer. High resolution mass spectrometries were recorded on a Waters Synapt G2 HDMS (ESI-MS) and a SHIMADZU GCMS-QP5050A (EI-MS). IR spectra were recorded on a JASCO FT/IR-4100 spectrometer. Fluorescence spectroscopy was recorded on a JASCO FP-6200. Melting point were recorded on a BUCHI M-565. X-ray measurements were carried out on a Rigaku R-Axis RAPID or Rigaku Mercury70 diffractometer with graphite monochromated Mo K $\alpha$  radiation at −100 °C.

## 2. General Procedure for the difluoromethanesulfinylation of alcohols

Ph<sub>2</sub>P(O)Cl (37.3  $\mu$ L, 0.2 mmol, 1.0 equiv) was added to a suspension of HF<sub>2</sub>CSO<sub>2</sub>Na (55.2 mg, 0.4 mmol, 2.0 equiv) in toluene (1.0 mL) under nitrogen atmosphere, and the reaction was stirred at room temperature for 30 min. A solution of the desired alcohol **1** (0.2 mmol, 1.0 equiv) in toluene (1.0 mL) was then added to the mixture, and the reaction was stirred at room temperature for 3 h. After this time, the reaction mixture was diluted with diethyl ether and filtered. The filtrate was concentrated under reduced pressure, and the residue was purified by flash column chromatography using hexane/ethyl acetate (9:1) as the eluent.

### 4-Phenylbutyl difluoromethanesulfinate (2a)

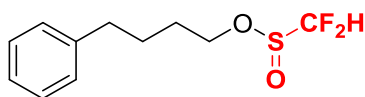

Following general procedure with Ph<sub>2</sub>P(O)Cl (37.3  $\mu$ L, 0.2 mmol, 1.0 equiv), HF<sub>2</sub>CSO<sub>2</sub>Na (55.2 mg, 0.4 mmol, 2.0 equiv), alcohol **1a** (30.0 mg, 0.2 mmol, 1.0 equiv) and toluene (1.0 + 1.0 mL), crude product was purified by silica gel column chromatography with hexane/ethyl acetate (9:1) to give the product **2a** (44.2 mg, 89%) as colorless oil.

<sup>1</sup>H NMR (300 MHz, CDCl<sub>3</sub>)  $\delta$ : 7.32–7.26 (m, 2H), 7.22–7.16 (m, 3H), 5.83 (t,  $J$  = 55.5 Hz, 1H), 4.23 (t,  $J$  = 4.5 Hz, 2H), 2.66 (t,  $J$  = 6.0 Hz, 2H), 1.85–1.68 (m, 4H) ppm. <sup>19</sup>F NMR (282 MHz, CDCl<sub>3</sub>)  $\delta$ : –123.2 and –125.6 (d-AB quartet,  $J$  = 272.1, 54.4 Hz, 2F) ppm. <sup>13</sup>C NMR (CDCl<sub>3</sub>, 126 MHz)  $\delta$ : 141.2, 128.4, 128.3 (2C), 126.0 (2C), 120.3 (t,  $J$  = 284.8 Hz), 70.5, 35.2, 29.5, 27.1 ppm. IR (neat): 3853, 3778, 3689, 3629, 3084, 3064, 3024, 2949, 2858, 2328, 2197, 1950, 1873, 1815, 1741, 1603, 1502, 1464, 1371, 1329, 1281, 1157, 1097 cm<sup>–1</sup>. HRMS (EI)  $m/z$ : [M]<sup>+</sup> calcd. for C<sub>11</sub>H<sub>14</sub>F<sub>2</sub>O<sub>2</sub>S 248.0683; found 248.0695.

### Benzyl difluoromethanesulfinate (2b)

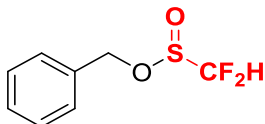

Following general procedure with Ph<sub>2</sub>P(O)Cl (37.3  $\mu$ L, 0.2 mmol, 1.0 equiv), HF<sub>2</sub>CSO<sub>2</sub>Na (55.2 mg, 0.4 mmol, 2.0 equiv), alcohol **1b** (21.6 mg, 0.2 mmol, 1.0 equiv) and toluene (1.0 + 1.0 mL), crude product was purified by silica gel column chromatography with hexane/ethyl acetate (9:1) to give the product **2b** (34.0 mg, 82%) as colorless oil.

<sup>1</sup>H NMR (300 MHz, CDCl<sub>3</sub>)  $\delta$ : 7.40 (br s, 5H), 5.87 (t,  $J$  = 54.0 Hz, 1H), 5.21 (s, 2H) ppm. <sup>19</sup>F NMR (282 MHz, CDCl<sub>3</sub>)  $\delta$ : –122.8 and –125.4 (d-AB quartet,  $J$  = 271.9, 53.3 Hz, 2F) ppm. <sup>13</sup>C NMR (CDCl<sub>3</sub>, 126 MHz)  $\delta$ : 134.2, 129.3, 128.9 (2C), 128.7 (2C), 120.2 (t,  $J$  = 285.4 Hz), 71.5 ppm. IR (neat): 3602,

3419, 3060, 3032, 2925, 2841, 2746, 2495, 2368. 1722, 1639, 1491, 1456, 1352, 1161, 1065, 1026  $\text{cm}^{-1}$ . MS (ESI)  $m/z$ : 229  $[\text{M}+\text{Na}]^+$ . Anal. Calcd for  $\text{C}_8\text{H}_8\text{F}_2\text{O}_2\text{S}$ : C, 46.60; H, 3.91; S, 15.55; found: C, 46.59; H, 3.91; S, 15.55.

#### 4-Methylbenzyl difluoromethanesulfinate (2c)

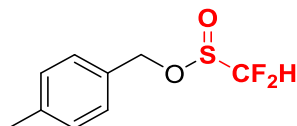

Following general procedure with  $\text{Ph}_2\text{P}(\text{O})\text{Cl}$  (37.3  $\mu\text{L}$ , 0.2 mmol, 1.0 equiv),  $\text{HF}_2\text{CSO}_2\text{Na}$  (55.2 mg, 0.4 mmol, 2.0 equiv), alcohol **1c** (24.4 mg, 0.2 mmol, 1.0 equiv) and toluene (1.0 + 1.0 mL), crude product was purified by silica gel column chromatography with hexane/ethyl acetate (9:1) to give the product **2c** (35.2 mg, 80%) as colorless oil.

$^1\text{H}$  NMR (300 MHz,  $\text{CDCl}_3$ )  $\delta$ : 7.28 (d,  $J = 9.0$  Hz, 2H), 7.21 (d,  $J = 9.0$  Hz, 2H), 5.85 (t,  $J = 55.5$  Hz, 1H), 5.16 (s, 2H), 2.37 (s, 3H) ppm.  $^{19}\text{F}$  NMR (282 MHz,  $\text{CDCl}_3$ )  $\delta$ : -122.6 and -125.3 (d-AB quartet,  $J = 271.7$ , 53.6 Hz, 2F) ppm.  $^{13}\text{C}$  NMR ( $\text{CDCl}_3$ , 126 MHz)  $\delta$ : 139.4, 131.1, 129.6 (2C), 128.9 (2C), 120.3 (t,  $J = 286.0$  Hz), 71.6, 21.3 ppm. IR (neat): 3622, 3498, 3300, 2866, 2542, 2443, 2368, 2299, 1890, 1738, 1631, 1512, 1427, 1383, 1315, 1184, 1076, 1034  $\text{cm}^{-1}$ . HRMS (ESI)  $m/z$ :  $[\text{M}+\text{Na}]^+$  calcd. for  $\text{C}_9\text{H}_{10}\text{F}_2\text{O}_2\text{NaS}$  243.0267; found 243.0258.

#### 4-Bromobenzyl difluoromethanesulfinate (2d)

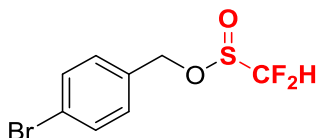

Following general procedure with  $\text{Ph}_2\text{P}(\text{O})\text{Cl}$  (37.3  $\mu\text{L}$ , 0.2 mmol, 1.0 equiv),  $\text{HF}_2\text{CSO}_2\text{Na}$  (55.2 mg, 0.4 mmol, 2.0 equiv), alcohol **1d** (37.4 mg, 0.2 mmol, 1.0 equiv) and toluene (1.0 + 1.0 mL), crude product was purified by silica gel column chromatography with hexane/ethyl acetate (9:1) to give the product **2d** (49.1 mg, 86%) as brown oil.

$^1\text{H}$  NMR (300 MHz,  $\text{CDCl}_3$ )  $\delta$ : 7.54 (d,  $J = 8.5$  Hz, 2H), 7.26 (d,  $J = 8.2$  Hz, 2H), 5.88 (t,  $J = 54.6$  Hz, 1H), 5.16 (s, 2H) ppm.  $^{19}\text{F}$  NMR (282 MHz,  $\text{CDCl}_3$ )  $\delta$ : -122.7 and -125.3 (d-AB quartet,  $J = 271.7$ , 53.6 Hz, 2F) ppm.  $^{13}\text{C}$  NMR ( $\text{CDCl}_3$ , 126 MHz)  $\delta$ : 133.2, 132.1 (2C), 130.2 (2C), 123.6, 120.3 (t,  $J = 286.0$  Hz), 70.6 ppm. IR (KBr): 3824, 3730, 3666, 3101, 2960, 2877, 2582, 2447, 2283, 2200, 1897, 1782, 1595, 1495, 1448, 1412, 1360, 1284, 1169, 1093  $\text{cm}^{-1}$ . HRMS (EI)  $m/z$ :  $[\text{M}]^+$  calcd. for  $\text{C}_8\text{H}_7\text{BrF}_2\text{O}_2\text{S}$  283.9318; found 283.9331.

#### 4-Nitrobenzyl difluoromethanesulfinate (2e)



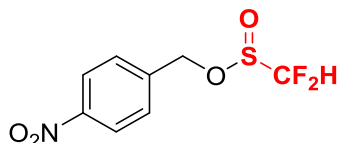

Following general procedure with  $\text{Ph}_2\text{P}(\text{O})\text{Cl}$  (37.3  $\mu\text{L}$ , 0.2 mmol, 1.0 equiv),  $\text{HF}_2\text{CSO}_2\text{Na}$  (55.2 mg, 0.4 mmol, 2.0 equiv), alcohol **1e** (30.6 mg, 0.2 mmol, 1.0 equiv) and toluene (1.0 + 1.0 mL), crude product was purified by silica gel column chromatography with hexane/ethyl acetate (9:1) to give the product **2e** (44.0 mg, 88%) as a yellow oil.

$^1\text{H}$  NMR (300 MHz,  $\text{CDCl}_3$ )  $\delta$ : 8.26 (d,  $J = 9.0$  Hz, 2H), 7.56 (d,  $J = 6.0$  Hz, 2H), 5.96 (t,  $J = 54.0$  Hz, 1H), 5.31 (s, 2H) ppm.  $^{19}\text{F}$  NMR (282 MHz,  $\text{CDCl}_3$ )  $\delta$ : -122.6 and -125.0 (d-AB quartet,  $J = 272.1$ , 54.4 Hz, 2F) ppm.  $^{13}\text{C}$  NMR ( $\text{CDCl}_3$ , 126 MHz)  $\delta$ : 148.2, 141.4, 128.7 (2C), 124.0 (2C), 120.2 (t,  $J = 286.7$  Hz), 69.5 ppm. IR (KBr): 3905, 3845, 3737, 3651, 3435, 3078, 2326, 1836, 1724, 1649, 1533, 1338, 1095  $\text{cm}^{-1}$ . HRMS (EI)  $m/z$ :  $[\text{M}]^+$  calcd. for  $\text{C}_8\text{H}_7\text{F}_2\text{NO}_4\text{S}$  251.0064; found 251.0065.

#### Octyl difluoromethanesulfinate (**2f**)

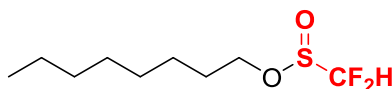

Following general procedure with  $\text{Ph}_2\text{P}(\text{O})\text{Cl}$  (37.3  $\mu\text{L}$ , 0.2 mmol, 1.0 equiv),  $\text{HF}_2\text{CSO}_2\text{Na}$  (55.2 mg, 0.4 mmol, 2.0 equiv), alcohol **1f** (26.0 mg, 0.2 mmol, 1.0 equiv) and toluene (1.0 + 1.0 mL), crude product was purified by silica gel column chromatography with hexane/ethyl acetate (9:1) to give the product **2f** (36.0 mg, 79%) as colorless oil.

Gram scale: Following general procedure,  $\text{Ph}_2\text{P}(\text{O})\text{Cl}$  (1.5 mL, 7.7 mmol, 1.0 equiv) and  $\text{HF}_2\text{CSO}_2\text{Na}$  (2.1 g, 15.4 mmol, 2.0 equiv) in toluene (38.5 mL) was reacted with alcohol **1f** (1.0 g, 7.7 mmol, 1.0 equiv) in toluene (38.5 mL), crude product was purified by silica gel column chromatography with hexane/ethyl acetate (9:1) to give the product **2f** (1.7 g, 7.5 mmol, 98%) as colorless oil.

$^1\text{H}$  NMR (300 MHz,  $\text{CDCl}_3$ )  $\delta$ : 5.83 (t,  $J = 54.7$  Hz, 1H), 4.21 (t,  $J = 6.6$  Hz, 2H), 1.79–1.70 (m, 2H), 1.40–1.27 (m, 10H), 0.89–0.85 (m, 3H) ppm.  $^{19}\text{F}$  NMR (282 MHz,  $\text{CDCl}_3$ )  $\delta$ : -123.3 and -125.7 (d-AB quartet,  $J = 272.1$ , 54.4 Hz, 2F) ppm.  $^{13}\text{C}$  NMR ( $\text{CDCl}_3$ , 126 MHz)  $\delta$ : 120.3 (t,  $J = 285.4$  Hz), 70.9, 31.7, 30.0, 29.1, 29.0, 25.4, 22.6, 14.1 ppm. IR (neat): 3897, 3778, 3649, 2964, 2866, 2185, 1734, 1603, 1379, 1176, 1018  $\text{cm}^{-1}$ . HRMS (ESI)  $m/z$ :  $[\text{M}+\text{Na}]^+$  calcd. for  $\text{C}_9\text{H}_{18}\text{F}_2\text{O}_2\text{NaS}$  251.0893; found 251.0891.

#### Dec-9-en-1-yl difluoromethanesulfinate (**2g**)

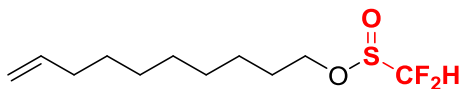

Following general procedure with  $\text{Ph}_2\text{P}(\text{O})\text{Cl}$  (37.3  $\mu\text{L}$ , 0.2 mmol, 1.0 equiv),  $\text{HF}_2\text{CSO}_2\text{Na}$  (55.2 mg, 0.4 mmol, 2.0 equiv), alcohol **1g** (31.3 mg, 0.2 mmol, 1.0 equiv) and toluene (1.0 + 1.0 mL), crude product was purified by silica gel column chromatography with hexane/ethyl acetate (9:1) to give the product **2g** (49.8 mg, 98%) as colorless oil.

$^1\text{H}$  NMR (300 MHz,  $\text{CDCl}_3$ )  $\delta$ : 5.86–5.73 (m, 1H), 5.83 (t,  $J = 55.5$  Hz, 1H), 4.96 (t,  $J = 15.0$  Hz, 2H), 4.21 (t,  $J = 7.5$  Hz, 2H), 2.04–2.00 (m, 2H), 1.76–1.72 (m, 2H), 1.36–1.30 (m, 10H) ppm.  $^{19}\text{F}$  NMR (282 MHz,  $\text{CDCl}_3$ )  $\delta$ : –123.3 and –125.6 (d-AB quartet,  $J = 271.3$ , 54.4 Hz, 2F) ppm.  $^{13}\text{C}$  NMR ( $\text{CDCl}_3$ , 126 MHz)  $\delta$ : 139.1, 120.3 (t,  $J = 284.8$  Hz), 114.2, 70.9, 33.7, 30.0, 29.2, 28.93, 28.91, 28.8, 25.3 ppm. IR (neat): 3745, 3606, 3462, 3008, 2933, 2858, 2503, 2312, 1730, 1448, 1236, 1153, 1045  $\text{cm}^{-1}$ . HRMS (ESI)  $m/z$ :  $[\text{M}-\text{H}]^+$  calcd. for  $\text{C}_{11}\text{H}_{19}\text{F}_2\text{O}_2\text{S}$  253.1074; found 253.1099.

**(1*R*,2*S*,5*R*)-2-Isopropyl-5-methylcyclohexyl difluoromethanesulfinate (2h)**

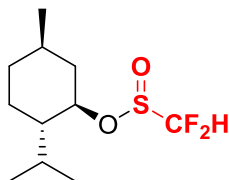

Following general procedure with  $\text{Ph}_2\text{P}(\text{O})\text{Cl}$  (37.3  $\mu\text{L}$ , 0.2 mmol, 1.0 equiv),  $\text{HF}_2\text{CSO}_2\text{Na}$  (55.2 mg, 0.4 mmol, 2.0 equiv), alcohol **1h** (31.3 mg, 0.2 mmol, 1.0 equiv) and toluene (1.0 + 1.0 mL), crude product was purified by silica gel column chromatography with hexane/ethyl acetate (9:1) to give the product **2h** (46.1 mg, 91%, inseparable mixture of isomers; major:minor = 1:1) as colorless oil.

$^1\text{H}$  NMR (300 MHz,  $\text{CDCl}_3$ )  $\delta$ : 5.82 (t,  $J = 54.8$  Hz, 0.5H), 5.79 (t,  $J = 54.9$  Hz, 0.5H), 4.22–4.12 (m, 1H), 2.23–2.01 (m, 2H), 1.77–1.67 (m, 2H), 1.51–0.76 (m, 14H) ppm.  $^{19}\text{F}$  NMR (282 MHz,  $\text{CDCl}_3$ )  $\delta$ : –122.6– –125.6 (m, 2F) ppm.  $^{13}\text{C}$  NMR ( $\text{CDCl}_3$ , 126 MHz)  $\delta$ : 120.48 (t,  $J = 287.3$  Hz), 120.47 (t,  $J = 281.6$  Hz), 85.1, 83.3, 48.0, 47.8, 43.3, 42.2, 33.70, 33.65, 31.8, 31.7, 25.3, 25.2, 23.1, 22.9, 21.9, 21.8, 20.68, 20.66, 15.5, 15.4 ppm. IR (neat): 3842, 3757, 3016, 2960, 2933, 2866, 2735, 2185, 1666, 1464, 1348, 1165, 1097, 1038  $\text{cm}^{-1}$ . HRMS (ESI)  $m/z$ :  $[\text{M}+\text{Na}]^+$  calcd. for  $\text{C}_{11}\text{H}_{20}\text{F}_2\text{O}_2\text{NaS}$  277.1050; found 277.1054.

**(3*S*,5*S*,7*S*)-Adamantan-1-yl difluoromethanesulfinate (2i)**

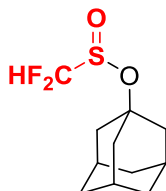

Following general procedure with  $\text{Ph}_2\text{P}(\text{O})\text{Cl}$  (37.3  $\mu\text{L}$ , 0.2 mmol, 1.0 equiv),  $\text{HF}_2\text{CSO}_2\text{Na}$  (55.2 mg, 0.4 mmol, 2.0 equiv), alcohol **1i** (30.5 mg, 0.2 mmol, 1.0 equiv) and toluene (1.0 + 1.0 mL), crude

product was purified by silica gel column chromatography with hexane/ethyl acetate (9:1) to give the product **2i** (39.0 mg, 78%) as a white semi-solid.

$^1\text{H}$  NMR (300 MHz,  $\text{CDCl}_3$ )  $\delta$ : 5.77 (t,  $J = 55.5\text{ Hz}$ , 1H), 2.25 (br s, 3H), 2.02 (br s, 6H), 1.66 (br s, 6H) ppm.  $^{19}\text{F}$  NMR (282 MHz,  $\text{CDCl}_3$ )  $\delta$ : -123.8 and -125.8 (d- AB quartet,  $J = 267.1$ , 54.4 Hz, 2F) ppm.  $^{13}\text{C}$  NMR ( $\text{CDCl}_3$ , 126 MHz)  $\delta$ : 120.7 (t,  $J = 283.5\text{ Hz}$ ), 84.7, 43.4, 35.5, 31.1 ppm. IR (KBr): 3969, 3869, 3745, 3685, 3566, 3471, 3307, 3199, 3072, 2848, 2646, 2355, 1703, 1442, 1304, 1169, 1090  $\text{cm}^{-1}$ . HRMS (EI)  $m/z$ :  $[\text{M}]^+$  calcd. for  $\text{C}_{11}\text{H}_{16}\text{F}_2\text{O}_2\text{S}$  250.0839; found 250.0842.

#### ***O*-Difluoromethanesulfinyl 5-cholesten-3 $\beta$ -ol (**2j**)**

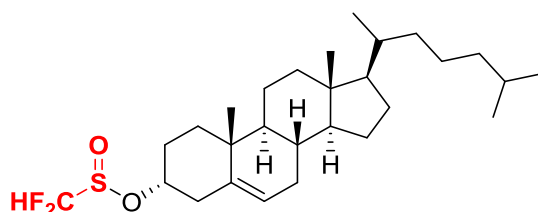

Following general procedure with  $\text{Ph}_2\text{P}(\text{O})\text{Cl}$  (37.3  $\mu\text{L}$ , 0.2 mmol, 1.0 equiv),  $\text{HF}_2\text{CSO}_2\text{Na}$  (55.2 mg, 0.4 mmol, 2.0 equiv), 5-cholesten-3 $\beta$ -ol **1j** (77.3 mg, 0.2 mmol, 1.0 equiv) and toluene (1.0 + 1.0 mL), crude product was purified by silica gel column chromatography with hexane/ethyl acetate (9:1) to give the product **2j** (85.9 mg, 89%, inseparable mixture of isomers; major:minor = 1:1) as a white solid.

Mp: 118.5–121.0  $^\circ\text{C}$ .  $^1\text{H}$  NMR (300 MHz,  $\text{CDCl}_3$ )  $\delta$ : 5.80 (t,  $J = 54.9\text{ Hz}$ , 1H), 5.41 (br s, 1H), 4.29–4.18 (m, 1H), 2.59–2.40 (m, 2H), 2.03–1.73 (m, 6H), 1.60–0.85 (m, 32H), 0.67 (s, 3H) ppm.  $^{19}\text{F}$  NMR (282 MHz,  $\text{CDCl}_3$ )  $\delta$ : -123.7 and -125.7 (d-AB quartet,  $J = 270.1$ , 53.3 Hz, 2F) ppm.  $^{13}\text{C}$  NMR ( $\text{CDCl}_3$ , 126 MHz)  $\delta$ : 138.71, 138.69, 123.7, 123.6, 120.4 (t,  $J = 285.4\text{ Hz}$ ), 82.8, 82.7, 56.6, 56.1, 49.9, 42.3, 40.1, 39.6, 39.5, 37.0, 36.9, 36.42, 36.37, 36.1, 35.8, 31.8, 31.7, 29.8, 29.3, 28.2, 28.0, 24.2, 23.8, 22.8, 22.5, 21.0, 19.2, 18.7, 11.8 ppm. IR (KBr): 3980, 3884, 3797, 3705, 3562, 3458, 3319, 3045, 2867, 2713, 2351, 2193, 1666, 1360, 1161, 1105  $\text{cm}^{-1}$ . HRMS (EI)  $m/z$ :  $[\text{M}]^+$  calcd. for  $\text{C}_{28}\text{H}_{46}\text{F}_2\text{O}_2\text{S}$  484.3187; found 484.3202.

#### **Difluoromethanesulfinate mono-ester of Proline derivative (**2k**)**

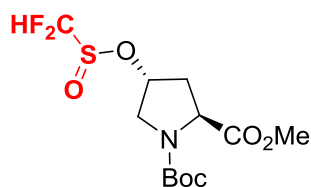

Following general procedure with  $\text{Ph}_2\text{P}(\text{O})\text{Cl}$  (37.3  $\mu\text{L}$ , 0.2 mmol, 1.0 equiv),  $\text{HF}_2\text{CSO}_2\text{Na}$  (55.2 mg, 0.20 mmol, 2.0 equiv), alcohol **1k** (49.1 mg, 0.20 mmol, 1.0 equiv) and toluene (1.0 + 1.0 mL), crude product was purified by silica gel column chromatography with hexane/ethyl acetate (6:1) to give the

product **2k** (33.0 mg, 48%, inseparable mixture of isomers, major:minor = 1:1) as colorless oil.

$^1\text{H}$  NMR (300 MHz,  $\text{CDCl}_3$ )  $\delta$ : 5.87 (t,  $J$  = 54.0 Hz, 1H), 5.06 (s, 1H), 4.50–4.33 (s, 1H), 3.88–3.57 (m, 2H), 3.75 (s, 3H), 2.79–2.50 (m, 1H), 2.30–2.22 (m, 1H), 1.46 (s, 4.5H, minor isomer), 1.41 (s, 4.5H, major isomer) ppm.  $^{19}\text{F}$  NMR (282 MHz,  $\text{CDCl}_3$ )  $\delta$ : –122.6–127.2 (m, 2F) ppm.  $^{13}\text{C}$  NMR ( $\text{CDCl}_3$ , 126 MHz)  $\delta$ : 172.7, 172.5, 153.5, 153.3, 120.2 (t,  $J$  = 288.5 Hz), 81.1, 79.5, 79.4, 79.0, 78.2, 57.9, 57.5, 57.4, 57.1, 57.0, 54.7, 54.6, 53.0, 52.7, 52.7, 52.5, 52.3, 52.1, 39.1, 38.5, 37.9, 37.5, 36.9, 36.6, 28.2 (3C) ppm. IR (KBr): 2980, 1751, 1705, 1404, 1163  $\text{cm}^{-1}$ . HRMS (ESI)  $m/z$ :  $[\text{M}+\text{Na}]^+$  calcd. for  $\text{C}_{12}\text{H}_{19}\text{F}_2\text{NO}_6\text{NaS}$  366.0799; found 366.0807.

#### Difluoromethanesulfinate di-ester of 19-*O*-TIPS-andrographolide (**2l**)

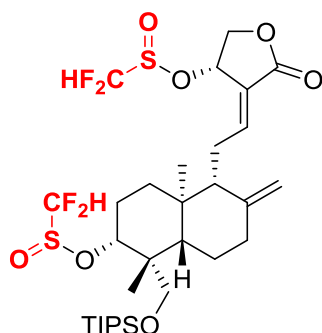

Following general procedure with  $\text{Ph}_2\text{P}(\text{O})\text{Cl}$  (111.8  $\mu\text{L}$ , 0.6 mmol, 4.0 equiv),  $\text{HF}_2\text{CSO}_2\text{Na}$  (82.8 mg, 0.6 mmol, 4.0 equiv), alcohol **1l** (77.9 mg, 0.15 mmol, 1.0 equiv) and toluene (0.75 + 0.75 mL), crude product was purified by silica gel column chromatography with hexane/ethyl acetate (7:3) to give the product **2l** (51.7 mg, 49%) as a white solid.

Mp: 58.3–59.6  $^\circ\text{C}$  ( $\text{CHCl}_3$ ).  $^1\text{H}$  NMR (300 MHz,  $\text{CDCl}_3$ )  $\delta$ : 7.51 (s, 1H), 5.81 (t,  $J$  = 54.0 Hz, 1H), 5.76 (t,  $J$  = 55.5 Hz, 1H), 4.96 (s, 1H), 4.88–4.86 (m, 3H), 4.76 (d,  $J$  = 12.0 Hz, 1H), 4.11–4.05 (m, 1H), 3.89 (t,  $J$  = 10.5, 1H), 3.73 (d,  $J$  = 9.0 Hz, 1H), 2.46–2.42 (m, 2H), 2.29–2.12 (m, 2H), 2.02–1.65 (m, 7H), 1.39–1.25 (m, 3H), 1.13 (s, 3H), 1.05 (s, 18H), 0.88–0.84 (m, 1H), 0.77 (s, 3H) ppm.  $^{19}\text{F}$  NMR (282 MHz,  $\text{CDCl}_3$ )  $\delta$ : –122.3, –125.0 (d, AB quartet,  $J$  = 270.7, 53.6 Hz, 2F), –123.1, –125.5 (d, AB quartet,  $J$  = 269.3, 56.4 Hz, 2F) ppm.  $^{13}\text{C}$  NMR ( $\text{CDCl}_3$ , 126 MHz)  $\delta$ : 171.2, 147.3, 146.2, 145.0, 135.8, 120.5 (t,  $J$  = 285.4 Hz), 120.4 (t,  $J$  = 284.1 Hz), 108.2, 92.1, 90.1, 70.2, 63.0, 55.6, 54.2, 52.9, 44.2, 38.6, 37.0, 32.3, 27.3, 26.1, 25.5, 23.0, 22.6, 18.1 (6C), 15.1, 11.9 (3C) ppm. IR (KBr): 2943, 1760, 1645, 1462, 1105, 810  $\text{cm}^{-1}$ . MS (ESI)  $m/z$ : 725  $[\text{M}+\text{Na}]^+$  Calcd. Chemical formula:  $\text{C}_{31}\text{H}_{50}\text{F}_4\text{O}_7\text{S}_2\text{Si}$ , Mass = 702.27.

#### Difluoromethanesulfinate mono-ester of 7, 10, 13-triBoc-10-Deacetylbaecatin III (**2m**)

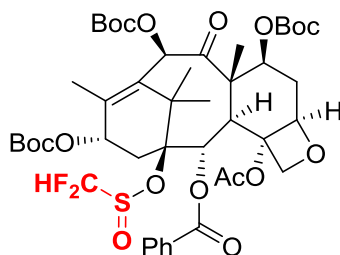

Following general procedure with  $\text{Ph}_2\text{P}(\text{O})\text{Cl}$  (33.5  $\mu\text{L}$ , 0.18 mmol, 2.0 equiv),  $\text{HF}_2\text{CSO}_2\text{Na}$  (24.9 mg, 0.18 mmol, 2.0 equiv), alcohol **1m** (74.7 mg, 0.09 mmol, 1.0 equiv) and toluene (1.0 + 1.0 mL). A part of crude product was purified by silica gel column chromatography with hexane/ethyl acetate (4:1) to give the product **2m** (54%, yield was determined by  $^{19}\text{F}$  NMR, because the product **2m** was unstable and decomposed within a few days in the fridge).

Mp: 213.8–215.0  $^{\circ}\text{C}$  ( $\text{CHCl}_3$ ).  $^{19}\text{F}$  NMR (282 MHz,  $\text{CDCl}_3$ )  $\delta$ : –123.7, –125.5 (d, AB quartet,  $J$  = 266.5, 53.6 Hz, 2F) ppm. IR (KBr): 2985, 1713, 1654, 1087, 963, 799  $\text{cm}^{-1}$ . MS (ESI)  $m/z$ : 965  $[\text{M}+\text{Na}]^+$ . Calcd. Chemical formula:  $\text{C}_{45}\text{H}_{60}\text{F}_2\text{O}_{17}\text{S}$ , Mass = 942.35.

#### Difluoromethanesulfinate mono-ester of Fumagillol (**2n**)

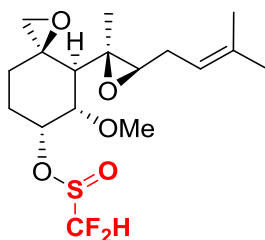

Following general procedure with  $\text{Ph}_2\text{P}(\text{O})\text{Cl}$  (22.4  $\mu\text{L}$ , 0.12 mmol, 2.0 equiv),  $\text{HF}_2\text{CSO}_2\text{Na}$  (16.6 mg, 0.12 mmol, 2.0 equiv), alcohol **1n** (16.6 mg, 0.06 mmol, 1.0 equiv) and toluene (0.3 + 0.3 mL), crude product was purified by silica gel column chromatography with hexane/ethyl acetate (4:1) to give the product **2n** (9.0 mg, 40%) as a white solid.

Mp: 106.2–107.5  $^{\circ}\text{C}$  ( $\text{CHCl}_3$ ).  $^1\text{H}$  NMR (500 MHz,  $\text{CDCl}_3$ )  $\delta$ : 6.20 (t,  $J$  = 52.5 Hz, 0.25H, minor isomer), 5.93 (t,  $J$  = 55.0 Hz, 0.75H, major isomer), 5.20 (t,  $J$  = 7.5 Hz, 1H), 5.05 (s, 1H), 3.70 (dd,  $J$  = 10.0, 5.0 Hz, 1H), 3.49 (s, 3H), 2.98 (d,  $J$  = 4.3 Hz, 1H), 2.60–2.57 (m, 2H), 2.39–2.34 (m, 1H), 2.22–2.04 (m, 3H), 1.98 (d,  $J$  = 10.0 Hz, 2H), 1.74 (s, 3H), 1.65 (s, 3H), 1.23 (s, 3H), 1.19–1.10 (m, 1H) ppm.  $^{19}\text{F}$  NMR (282 MHz,  $\text{CDCl}_3$ )  $\delta$ : –123.7, –125.3 (d, AB quartet,  $J$  = 272.1, 56.4 Hz, 2F) ppm.  $^{13}\text{C}$  NMR ( $\text{CDCl}_3$ , 126 MHz)  $\delta$ : 134.9, 120.7 (t,  $J$  = 294.2 Hz), 118.5, 80.3, 79.5, 75.8, 74.1, 60.7, 59.1, 58.2, 56.7, 51.1, 47.7, 28.6, 27.3, 26.5, 25.7, 18.0, 14.2 ppm. IR (KBr): 3144, 2943, 1104, 922, 833  $\text{cm}^{-1}$ . HRMS (ESI)  $m/z$ :  $[\text{M}+\text{Na}]^+$  calcd. for  $\text{C}_{17}\text{H}_{26}\text{F}_2\text{O}_5\text{NaS}$  403.1367; found 403.1353.

### 3. General Procedure for the trifluoromethylsulfonylation of alcohols

Ph<sub>2</sub>P(O)Cl (37.3  $\mu$ L, 0.2 mmol, 1.0 equiv) was added to a suspension of F<sub>3</sub>CSO<sub>2</sub>Na (62.4 mg, 0.4 mmol, 2.0 equiv) in toluene (1.0 mL) under nitrogen atmosphere, and the reaction was stirred at room temperature for 30 min. A solution of the alcohol **1** (0.2 mmol, 1.0 equiv) in toluene (1.0 mL) was then added to the mixture followed by TMSCl (2.5  $\mu$ L, 0.02 mmol, 0.1 equiv), and the reaction was stirred at room temperature for 3 h. After this time, the reaction mixture was diluted with diethyl ether and filtered. The filtrate was concentrated under reduced pressure, and the residue was purified by column chromatography using hexane/ethyl acetate (9:1) as the eluent.

#### 4-Phenylbutyl trifluoromethanesulfinate (**3a**)

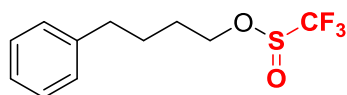

Following general procedure with Ph<sub>2</sub>P(O)Cl (37.3  $\mu$ L, 0.2 mmol, 1.0 equiv), F<sub>3</sub>CSO<sub>2</sub>Na (62.4 mg, 0.4 mmol, 2.0 equiv), alcohol **1a** (30.0 mg, 0.2 mmol, 1.0 equiv), TMSCl (2.5  $\mu$ L, 0.02 mmol, 0.1 equiv) and toluene (1.0 + 1.0 mL), crude product was purified by silica gel column chromatography with hexane/ethyl acetate (9:1) to give the product **3a** (49.0 mg, 92%) as colorless oil.

<sup>1</sup>H NMR (300 MHz, CDCl<sub>3</sub>)  $\delta$ : 7.32–7.25 (m, 2H), 7.22–7.16 (m, 3H), 4.39–4.34 (m, 1H), 4.15–4.10 (m, 1H), 2.66 (t,  $J$  = 6.9 Hz, 2H), 1.78–1.76 (m, 4H) ppm. <sup>19</sup>F NMR (282 MHz, CDCl<sub>3</sub>)  $\delta$ : –78.9 (s, 3F) ppm. <sup>13</sup>C NMR (CDCl<sub>3</sub>, 126 MHz)  $\delta$ : 141.4, 128.41 (2C), 128.35 (2C), 126.0, 122.8 (q,  $J$  = 339.4 Hz), 68.8, 35.1, 29.2, 27.1 ppm. IR (neat): 3816, 3697, 3084, 3060, 3024, 2960, 2862, 1946, 1815, 1603, 1495, 1465, 1383, 1213, 1136 cm<sup>–1</sup>. HRMS (EI)  $m/z$ : [M]<sup>+</sup> calcd. for C<sub>11</sub>H<sub>13</sub>F<sub>3</sub>O<sub>2</sub>S 266.0588; found 266.0590.

#### Benzyl trifluoromethanesulfinate (**3b**)<sup>2</sup>

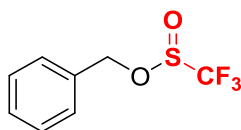

Following general procedure with Ph<sub>2</sub>P(O)Cl (37.3  $\mu$ L, 0.2 mmol, 1.0 equiv), F<sub>3</sub>CSO<sub>2</sub>Na (62.4 mg, 0.4 mmol, 2.0 equiv), alcohol **1b** (21.6 mg, 0.2 mmol, 1.0 equiv), TMSCl (2.5  $\mu$ L, 0.02 mmol, 0.1 equiv) and toluene (1.0 + 1.0 mL), crude product was purified by silica gel column chromatography with hexane/ethyl acetate (9:1) to give the product **3b** (38.6 mg, 86%) as colorless oil.

<sup>1</sup>H NMR (300 MHz, CDCl<sub>3</sub>)  $\delta$ : 7.41 (br s, 5H), 5.39 (d,  $J$  = 9.0 Hz, 1H), 5.10 (d,  $J$  = 12.0 Hz, 1H) ppm. <sup>19</sup>F NMR (282 MHz, CDCl<sub>3</sub>)  $\delta$ : –78.4 (s, 3F) ppm. <sup>13</sup>C NMR (CDCl<sub>3</sub>, 126 MHz)  $\delta$ : 133.6, 129.5, 129.0 (2C), 128.9 (2C), 123.0 (q,  $J$  = 339.8 Hz), 69.8 ppm. IR (neat): 3076, 2964, 2925, 2852, 2308, 1894, 1726, 1498, 1464, 1367, 1192, 1120 cm<sup>–1</sup>. HRMS (EI)  $m/z$ : [M+Na]<sup>+</sup> calcd. for C<sub>8</sub>H<sub>7</sub>F<sub>3</sub>O<sub>2</sub>S

224.0119; found 224.0126.

#### 4-Methylbenzyl trifluoromethanesulfinate (**3c**)<sup>2</sup>

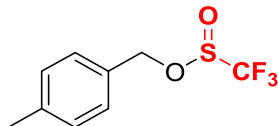

Following general procedure with Ph<sub>2</sub>P(O)Cl (37.3  $\mu$ L, 0.2 mmol, 1.0 equiv), F<sub>3</sub>CSO<sub>2</sub>Na (62.4 mg, 0.4 mmol, 2.0 equiv), alcohol **1c** (24.4 mg, 0.2 mmol, 1.0 equiv), TMSCl (2.5  $\mu$ L, 0.02 mmol, 0.1 equiv) and toluene (1.0 + 1.0 mL), crude product was purified by silica gel column chromatography with hexane/ethyl acetate (9:1) to give the product **3c** (95%, yield was determined by <sup>19</sup>F NMR, unstable under silica gel column chromatography) as pale yellow solid.

Mp: 56.1–57.3 °C. <sup>1</sup>H NMR (300 MHz, CDCl<sub>3</sub>)  $\delta$ : 7.29 (d,  $J$  = 9.0 Hz, 2H), 7.22 (d,  $J$  = 6.0 Hz, 2H), 5.34 (d,  $J$  = 12.0 Hz, 1H), 5.06 (d,  $J$  = 12.0 Hz, 1H), 2.38 (s, 3H) ppm. <sup>19</sup>F NMR (282 MHz, CDCl<sub>3</sub>)  $\delta$ : –78.8 (s, 3F) ppm. <sup>13</sup>C NMR (CDCl<sub>3</sub>, 126 MHz)  $\delta$ : 140.2, 131.1 (2C), 130.0 (2C), 119.8, 119.7 (q,  $J$  = 328.9 Hz), 55.8, 21.3 ppm. IR (KBr): 3973, 3820, 3678, 3535, 3427, 3224, 3045, 2885, 2721, 2362, 1913, 1610, 1519, 1360, 1192, 1120 cm<sup>–1</sup>. HRMS (EI)  $m/z$ : [M]<sup>+</sup> calcd. for C<sub>9</sub>H<sub>9</sub>F<sub>3</sub>O<sub>2</sub>S 238.0275; found 238.0277.

#### 4-Bromobenzyl trifluoromethanesulfinate (**3d**)

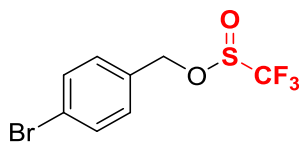

Following general procedure with Ph<sub>2</sub>P(O)Cl (37.3  $\mu$ L, 0.2 mmol, 1.0 equiv), F<sub>3</sub>CSO<sub>2</sub>Na (62.4 mg, 0.4 mmol, 2.0 equiv), alcohol **1d** (37.4 mg, 0.2 mmol, 1.0 equiv), TMSCl (2.5  $\mu$ L, 0.02 mmol, 0.1 equiv) and toluene (1.0 + 1.0 mL), crude product was purified by silica gel column chromatography with hexane/ethyl acetate (9:1) to give the product **3d** (56.0 mg, 92%) as brown oil.

<sup>1</sup>H NMR (300 MHz, CDCl<sub>3</sub>)  $\delta$ : 7.57 (d,  $J$  = 9.0 Hz, 2H), 7.27 (d,  $J$  = 9.0 Hz, 2H), 5.33 (d,  $J$  = 12.0 Hz, 1H), 5.04 (d,  $J$  = 12.0 Hz, 1H) ppm. <sup>19</sup>F NMR (282 MHz, CDCl<sub>3</sub>)  $\delta$ : –78.6 (s, 3F) ppm. <sup>13</sup>C NMR (CDCl<sub>3</sub>, 126 MHz)  $\delta$ : 132.6, 132.2 (2C), 130.4 (2C), 123.7, 122.9 (q,  $J$  = 339.8 Hz), 68.6 ppm. IR (KBr): 3714, 3570, 3041, 2885, 2395, 1894, 1595, 1491, 1404, 1367, 1304, 1277, 1217, 1128, 1065 cm<sup>–1</sup>. HRMS (EI)  $m/z$ : [M]<sup>+</sup> calcd. for C<sub>8</sub>H<sub>6</sub>BrF<sub>3</sub>O<sub>2</sub>S 301.9224; found 301.9233.

#### 4-Nitrobenzyl trifluoromethanesulfinate (**3e**)

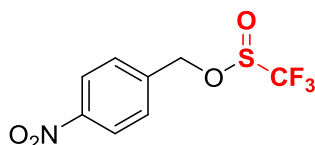

Following general procedure with  $\text{Ph}_2\text{P}(\text{O})\text{Cl}$  (37.3  $\mu\text{L}$ , 0.2 mmol, 1.0 equiv),  $\text{F}_3\text{CSO}_2\text{Na}$  (62.4 mg, 0.4 mmol, 2.0 equiv), alcohol **1e** (30.6 mg, 0.2 mmol, 1.0 equiv),  $\text{TMSCl}$  (2.5  $\mu\text{L}$ , 0.02 mmol, 0.1 equiv) and toluene (1.0 + 1.0 mL) crude product was purified by silica gel column chromatography with hexane/ethyl acetate (9:1) to give the product **3e** (49.2 mg, 91%) as a white solid.

Mp: 56.1–57.2 °C.  $^1\text{H}$  NMR (300 MHz,  $\text{CDCl}_3$ )  $\delta$ : 8.29 (d,  $J$  = 9.0 Hz, 2H), 7.58 (d,  $J$  = 9.0 Hz, 2H), 5.49 (d,  $J$  = 15.0 Hz, 1H), 5.17 (d,  $J$  = 12.0 Hz, 1H) ppm.  $^{19}\text{F}$  NMR (282 MHz,  $\text{CDCl}_3$ )  $\delta$ : –78.2 (s, 3F) ppm.  $^{13}\text{C}$  NMR ( $\text{CDCl}_3$ , 126 MHz)  $\delta$ : 148.3, 140.7, 128.9 (2C), 124.1 (2C), 122.9 (q,  $J$  = 340.2 Hz), 67.1 ppm. IR (KBr): 3965, 3849, 3674, 3610, 3479, 3352, 3195, 3020, 2862, 2654, 2436, 2305, 1738, 1512, 1196, 1113  $\text{cm}^{-1}$ . HRMS (ESI)  $m/z$ :  $[\text{M}-\text{H}]^+$  calcd. for  $\text{C}_8\text{H}_5\text{F}_3\text{NO}_4\text{S}$  267.9891; found 267.9889.

#### Octyl trifluoromethanesulfinate (**3f**)<sup>3</sup>

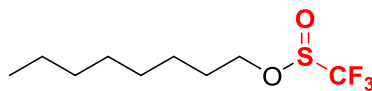

Following general procedure with  $\text{Ph}_2\text{P}(\text{O})\text{Cl}$  (37.3  $\mu\text{L}$ , 0.2 mmol, 1.0 equiv),  $\text{F}_3\text{CSO}_2\text{Na}$  (62.4 mg, 0.4 mmol, 2.0 equiv), alcohol **1f** (26.0 mg, 0.2 mmol, 1.0 equiv),  $\text{TMSCl}$  (2.5  $\mu\text{L}$ , 0.02 mmol, 0.1 equiv) and toluene (1.0 + 1.0 mL), crude product was purified by silica gel column chromatography with hexane/ethyl acetate (9:1) to give the product **3f** (43.1 mg, 87%) as colorless oil.

$^1\text{H}$  NMR (300 MHz,  $\text{CDCl}_3$ )  $\delta$ : 4.37 (d,  $J$  = 7.1 Hz, 1H), 4.15 (d,  $J$  = 6.2 Hz, 1H), 1.76 (br s, 2H), 1.38–1.29 (m, 10H), 0.89 (br s, 3H) ppm.  $^{19}\text{F}$  NMR (282 MHz,  $\text{CDCl}_3$ )  $\delta$ : –79.0 (s, 3F) ppm.  $^{13}\text{C}$  NMR ( $\text{CDCl}_3$ , 126 MHz)  $\delta$ : 122.8 (q,  $J$  = 339.8 Hz), 69.2, 31.7, 29.7, 29.0, 28.9, 25.3, 22.6, 14.1 ppm. IR (neat): 3001, 2952, 2929, 2848, 2359, 2312, 1468, 1379, 1200, 1132  $\text{cm}^{-1}$ . HRMS (ESI)  $m/z$ :  $[\text{M}+\text{Na}]^+$  calcd. for  $\text{C}_9\text{H}_{17}\text{F}_3\text{O}_2\text{NaS}$  269.0799; found 269.0790.

#### Dec-9-en-1-yl trifluoromethanesulfinate (**3g**)

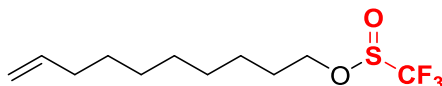

Following general procedure with  $\text{Ph}_2\text{P}(\text{O})\text{Cl}$  (37.3  $\mu\text{L}$ , 0.2 mmol, 1.0 equiv),  $\text{F}_3\text{CSO}_2\text{Na}$  (62.4 mg, 0.4 mmol, 2.0 equiv), alcohol **1g** (31.2 mg, 0.2 mmol, 1.0 equiv),  $\text{TMSCl}$  (2.5  $\mu\text{L}$ , 0.02 mmol, 0.1 equiv) and toluene (1.0 + 1.0 mL), crude product was purified by silica gel column chromatography with hexane/ethyl acetate (9:1) to give the product **3g** (51.2 mg, 94%) as colorless oil.

$^1\text{H}$  NMR (300 MHz,  $\text{CDCl}_3$ )  $\delta$ : 5.87–5.74 (m, 1H), 5.01–4.91 (m, 2H), 4.39–4.32 (m, 1H), 4.17–4.10



(m, 1H), 2.05–2.00 (m, 2H), 1.77–1.71 (m, 2H), 1.36–1.30 (m, 10H) ppm.  $^{19}\text{F}$  NMR (282 MHz,  $\text{CDCl}_3$ )  $\delta$ : –79.0 (s, 3F) ppm.  $^{13}\text{C}$  NMR ( $\text{CDCl}_3$ , 126 MHz)  $\delta$ : 139.1, 122.8 (q,  $J = 339.8$  Hz), 114.2, 69.2, 33.7, 29.7, 29.2, 28.92, 28.91, 28.8, 25.3 ppm. IR (neat): 3080, 2929, 2852, 2376, 2316, 1815, 1734, 1643, 1460, 1435, 1371, 1284, 1205, 1128  $\text{cm}^{-1}$ . HRMS (ESI)  $m/z$ :  $[\text{M}+\text{Na}]^+$  calcd. for  $\text{C}_{11}\text{H}_{19}\text{F}_3\text{O}_2\text{NaS}$  295.0956; found 295.0959.

**(1*R*,2*S*,5*R*)-2-Isopropyl-5-methylcyclohexyl trifluoromethanesulfinate (**3h**)**

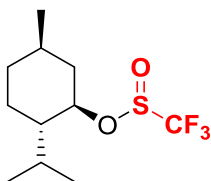

Following general procedure with  $\text{Ph}_2\text{P}(\text{O})\text{Cl}$  (37.3  $\mu\text{L}$ , 0.2 mmol, 1.0 equiv),  $\text{F}_3\text{CSO}_2\text{Na}$  (62.4 mg, 0.4 mmol, 2.0 equiv), alcohol **1h** (31.2 mg, 0.2 mmol, 1.0 equiv),  $\text{TMSCl}$  (2.5  $\mu\text{L}$ , 0.02 mmol, 0.1 equiv) and toluene (1.0 + 1.0 mL), crude product was purified by silica gel column chromatography with hexane/ethyl acetate (9:1) to give the product **3h** (44.2 mg, 81%, major:minor = 5:4) as colorless oil.

$^1\text{H}$  NMR (300 MHz,  $\text{CDCl}_3$ )  $\delta$ : 4.31–4.20 (m, 1H), 2.23–1.98 (m, 2H), 1.79–1.68 (m, 2H), 1.57–0.74 (m, 14H) ppm.  $^{19}\text{F}$  NMR (282 MHz,  $\text{CDCl}_3$ )  $\delta$ : –80.4 (s, 3F, major), –81.0 (s, 3F, minor) ppm.  $^{13}\text{C}$  NMR ( $\text{CDCl}_3$ , 126 MHz)  $\delta$ : 122.62 (q,  $J = 336.0$  Hz), 122.61 (q,  $J = 335.2$  Hz), 85.4, 84.5, 47.9, 47.7, 42.8, 42.1, 33.61, 33.59, 31.9, 31.7, 25.4, 25.2, 23.1, 22.9, 21.84, 21.78, 20.7, 20.6, 15.5, 15.4 ppm. IR (neat): 2952, 2933, 2866, 2725, 2376, 2305, 1464, 1383, 1188, 1128  $\text{cm}^{-1}$ . HRMS (ESI)  $m/z$ :  $[\text{M}+\text{Na}]^+$  calcd. for  $\text{C}_{11}\text{H}_{19}\text{F}_3\text{O}_2\text{NaS}$  295.0956; found 295.0954.

**(3*S*,5*S*,7*S*)-Adamantan-1-yl trifluoromethanesulfinate (**3i**)**

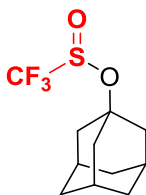

Following general procedure with  $\text{Ph}_2\text{P}(\text{O})\text{Cl}$  (37.3  $\mu\text{L}$ , 0.2 mmol, 1.0 equiv),  $\text{F}_3\text{CSO}_2\text{Na}$  (62.4 mg, 0.4 mmol, 2.0 equiv), alcohol **1i** (30.4 mg, 0.2 mmol, 1.0 equiv),  $\text{TMSCl}$  (2.5  $\mu\text{L}$ , 0.02 mmol, 0.1 equiv) and toluene (1.0 + 1.0 mL), crude product was purified by silica gel column chromatography with hexane/ethyl acetate (9:1) to give the product **3i** (37.2 mg, 69%) as colorless oil.

$^1\text{H}$  NMR (300 MHz,  $\text{CDCl}_3$ )  $\delta$ : 2.29 (s, 3H), 2.06 (br s, 6H), 1.68 (br s, 6H) ppm.  $^{19}\text{F}$  NMR (282 MHz,  $\text{CDCl}_3$ )  $\delta$ : –81.1 (s, 3F) ppm.  $^{13}\text{C}$  NMR ( $\text{CDCl}_3$ , 126 MHz)  $\delta$ : 122.8 (q,  $J = 334.3$  Hz), 86.5, 43.3, 35.4, 31.2 ppm. IR (neat): 3726, 3626, 3539, 3375, 3236, 2937, 2866, 2368, 2081, 1670, 1558, 1456, 1363,

1213, 1173, 1124, 1049  $\text{cm}^{-1}$ . HRMS (EI)  $m/z$ :  $[M]^+$  calcd. for  $\text{C}_{11}\text{H}_{15}\text{F}_3\text{O}_2\text{S}$  268.0745; found 268.0737.

#### Difluoromethanesulfinyl 5-cholesten-3 $\beta$ -ol (**3j**)

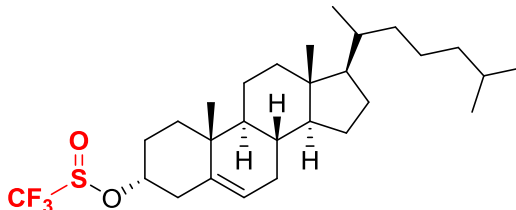

Following general procedure with  $\text{Ph}_2\text{P}(\text{O})\text{Cl}$  (37.3  $\mu\text{L}$ , 0.2 mmol, 1.0 equiv),  $\text{F}_3\text{CSO}_2\text{Na}$  (62.4 mg, 0.4 mmol, 2.0 equiv), 5-cholesten-3 $\beta$ -ol **1j** (77.3 mg, 0.2 mmol, 1.0 equiv),  $\text{TMSCl}$  (2.5  $\mu\text{L}$ , 0.02 mmol, 0.1 equiv) and toluene (1.0 + 1.0 mL), crude product was purified by silica gel column chromatography with hexane/ethyl acetate (9:1) to give the product **3j** (76.5 mg, 76%, major:minor = 6:5) as a white solid.

Mp: 145.0–147.4  $^{\circ}\text{C}$ .  $^1\text{H}$  NMR (300 MHz,  $\text{CDCl}_3$ )  $\delta$ : 5.41 (br s, 1H), 4.42–4.31 (m, 1H), 2.62–2.37 (m, 2H), 2.04–1.77 (m, 6H), 1.60–0.85 (m, 32H), 0.67 (s, 3H) ppm.  $^{19}\text{F}$  NMR (282 MHz,  $\text{CDCl}_3$ )  $\delta$ : –80.5 (s, 3F, minor), –80.5 (s, 3F, major) ppm.  $^{13}\text{C}$  NMR ( $\text{CDCl}_3$ , 126 MHz)  $\delta$ : 138.53, 138.51, 123.9, 122.7 (q,  $J = 336.8$  Hz), 83.1, 83.0, 56.6, 56.1, 49.9, 42.3, 39.8, 39.6, 39.5, 37.0, 36.9, 36.40, 36.37, 36.1, 35.8, 31.9, 31.7, 29.5, 29.4, 28.2, 28.0, 24.2, 23.8, 22.8, 22.5, 21.0, 19.2, 18.7, 11.8 ppm. IR (KBr): 3965, 3880, 3797, 3670, 3606, 3518, 3394, 3203, 3089, 2881, 2619, 2320, 1714, 1367, 1176, 1132  $\text{cm}^{-1}$ . HRMS (EI)  $m/z$ :  $[M]^+$  calcd. for  $\text{C}_{28}\text{H}_{45}\text{F}_3\text{O}_2\text{S}$  502.3092; found 502.3094.

#### 4. Crystal data collection and structure refinement for 4-Nitrobenzyl trifluoromethanesulfinate (**3e**)

##### Data Collection

A colorless block crystal of  $\text{C}_8\text{H}_6\text{F}_3\text{NO}_4\text{S}$  prepared from **3e** in Hexane having approximate dimensions of 0.250 x 0.150 x 0.100 mm was mounted on a glass fiber. All measurements were made on a Rigaku R-Axis RAPID diffractometer using graphite monochromated Mo-K $\alpha$  radiation.

The data were collected at a temperature of  $-100 \pm 1$   $^{\circ}\text{C}$  to a maximum  $2\theta$  value of  $54.9^{\circ}$ . A total of 44 oscillation images were collected. A sweep of data was done using  $\omega$  scans from  $130.0$  to  $190.0^{\circ}$  in  $5.0^{\circ}$  step, at  $c=45.0^{\circ}$  and  $f = 0.0^{\circ}$ . The exposure rate was 10.0 [sec./ $^{\circ}$ ]. A second sweep was performed using  $\omega$  scans from  $0.0$  to  $160.0^{\circ}$  in  $5.0^{\circ}$  step, at  $c=45.0^{\circ}$  and  $f = 180.0^{\circ}$ . The exposure rate was 10.0 [sec./ $^{\circ}$ ]. The crystal-to-detector distance was 127.40 mm. Readout was performed in the 0.100 mm pixel mode.

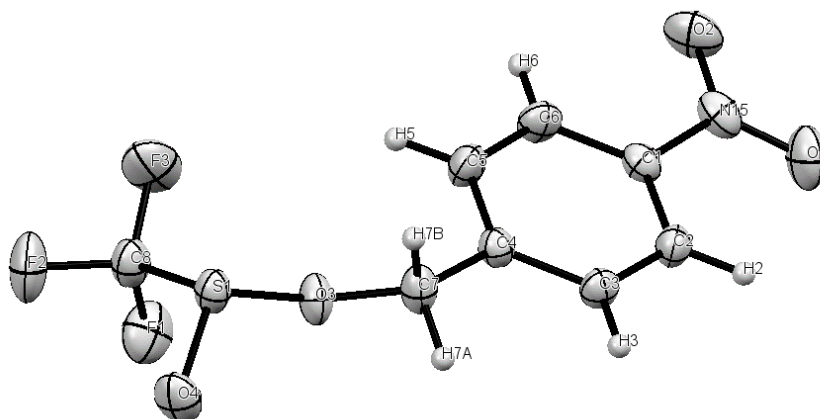

**Figure S1.** Thermal ellipsoid plot of the molecular structure of **3e**. Thermal ellipsoid probability set to 50%, only one molecule of the asymmetric unit shown.

#### A. Crystal Data

|                       |                                                                                                                                                              |
|-----------------------|--------------------------------------------------------------------------------------------------------------------------------------------------------------|
| Empirical Formula     | C <sub>8</sub> H <sub>6</sub> BrF <sub>3</sub> NO <sub>4</sub> S                                                                                             |
| Formula Weight        | 269.119                                                                                                                                                      |
| Crystal Color, Habit  | colorless, needle                                                                                                                                            |
| Crystal Dimensions    | 0.250 X 0.150 X 0.100 mm                                                                                                                                     |
| Crystal System        | monoclinic                                                                                                                                                   |
| Lattice Type          | Primitive                                                                                                                                                    |
| Lattice Parameters    | $a = 4.9106(2) \text{ \AA}$<br>$b = 19.7529(6) \text{ \AA}$<br>$c = 10.8754(4) \text{ \AA}$<br>$\beta = 103.8638(9)^\circ$<br>$V = 1024.16(5) \text{ \AA}^3$ |
| Space Group           | P2 <sub>1</sub> (#14)                                                                                                                                        |
| Z value               | 4                                                                                                                                                            |
| D <sub>calc</sub>     | 1.746 g/cm <sup>3</sup>                                                                                                                                      |
| F <sub>000</sub>      | 544.00                                                                                                                                                       |
| $\mu$ (MoK $\alpha$ ) | 3.636 cm <sup>-1</sup>                                                                                                                                       |

#### B. Intensity Measurements

|                  |                                                                            |
|------------------|----------------------------------------------------------------------------|
| Diffractometer   | R-AXIS RAPID                                                               |
| Radiation        | MoK $\alpha$ ( $\lambda = 0.71075 \text{ \AA}$ )<br>graphite monochromated |
| Voltage, Current | 50kV, 24mA                                                                 |

|                                       |                                                                       |
|---------------------------------------|-----------------------------------------------------------------------|
| Temperature                           | -100.0 °C                                                             |
| Detector Aperture                     | 280 x 256 mm                                                          |
| Data Images                           | 44 exposures                                                          |
| w oscillation Range (c=45.0, f=0.0)   | 130.0 - 190.0°                                                        |
| Exposure Rate                         | 10.0 sec./°                                                           |
| w oscillation Range (c=45.0, f=180.0) | 0.0 - 160.0°                                                          |
| Exposure Rate                         | 10.0 sec./°                                                           |
| Detector Position                     | 127.40 mm                                                             |
| Pixel Size                            | 0.100 mm                                                              |
| 2 $\theta_{\text{max}}$               | 54.9°                                                                 |
| No. of Reflections Measured           | Total: 9834<br>Unique: 2338 ( $R_{\text{int}} = 0.0.146$ )            |
| Corrections                           | Lorentz-polarization<br>Absorption<br>(trans. factors: 0.728 - 0.964) |

### C. Structure Solution and Refinement

|                                          |                                                                                                                  |
|------------------------------------------|------------------------------------------------------------------------------------------------------------------|
| Structure Solution                       | Direct Methods                                                                                                   |
| Refinement                               | Full-matrix least-squares on $F^2$                                                                               |
| Function Minimized                       | $S \sum w (F_o^2 - F_c^2)^2$                                                                                     |
| Least Squares Weights                    | $w = 1 / [ s^2 (F_o^2) + (0.0435 \cdot P)^2 + 0.3535 \cdot P ]$<br>where $P = (\text{Max}(F_o^2, 0) + 2F_c^2)/3$ |
| 2 $\theta_{\text{max}}$ cutoff           | 54.9°                                                                                                            |
| Anomalous Dispersion                     | All non-hydrogen atoms                                                                                           |
| No. Observations (All reflections)       | 2338                                                                                                             |
| No. Variables                            | 154                                                                                                              |
| Reflection/Parameter Ratio               | 15.18                                                                                                            |
| Residuals: $R_1$ ( $I > 2.00\sigma(I)$ ) | 0.0291                                                                                                           |
| Residuals: $R$ (All reflections)         | 0.0323                                                                                                           |
| Residuals: $wR_2$ (All reflections)      | 0.0829                                                                                                           |
| Goodness of Fit Indicator                | 1.098                                                                                                            |
| Max Shift/Error in Final Cycle           | 0.000                                                                                                            |
| Maximum peak in Final Diff. Map          | 0.32 e <sup>-</sup> /Å <sup>3</sup>                                                                              |
| Minimum peak in Final Diff. Map          | -0.31 e <sup>-</sup> /Å <sup>3</sup>                                                                             |

## 5. References

1. Yang, Q.; Li, Y.; Yang, J.-D.; Liu, Y.; Zhang, L.; Luo, S.; Cheng, J.-P. *Angew. Chem., Int. Ed.* **2020**, *19*, 19282–19291.
2. Braverman, S.; Manor, H. *Phosphorus, Sulfur, and Silicon* **1990**, *53*, 357.
3. Hasegawa, A.; Ishikawa, T.; Ishihara, K.; Yamamoto, H. *Bull. Chem. Soc. Jpn.* **2005**, *78*, 1401.

6.  $^1\text{H}$ ,  $^{19}\text{F}$  and  $^{13}\text{C}$  NMR spectra of compound 2 and 3

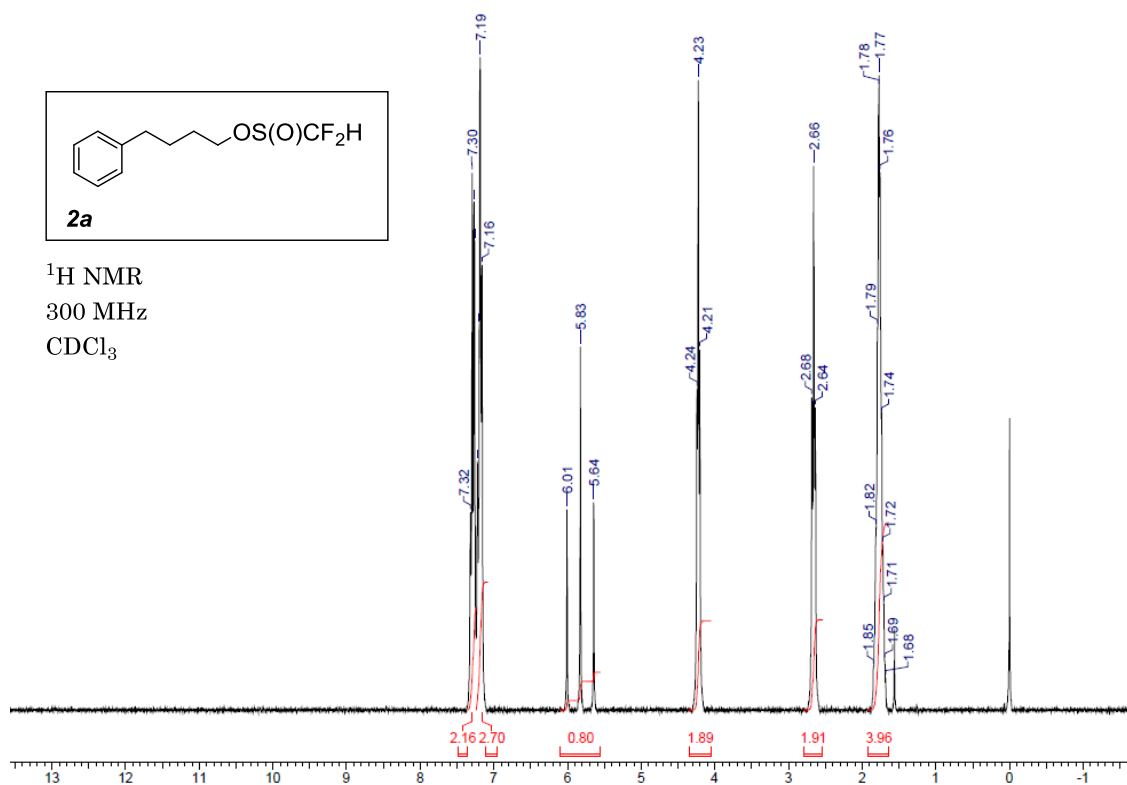

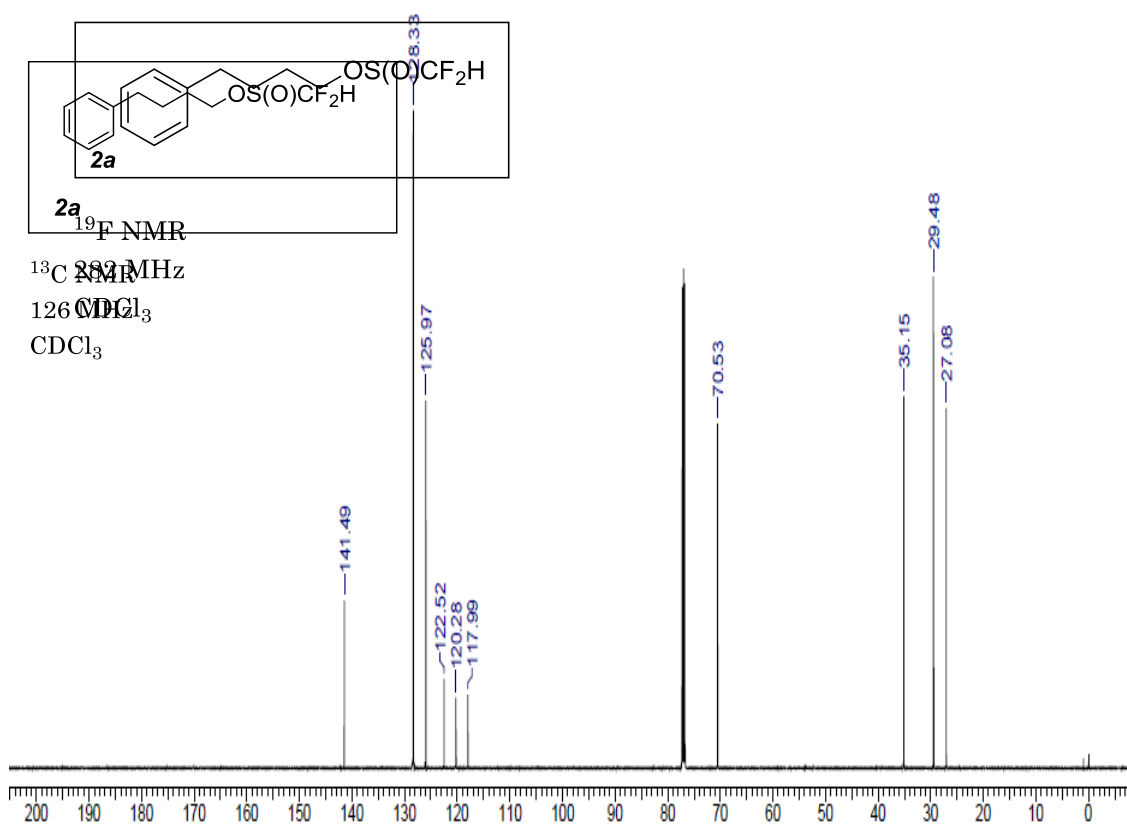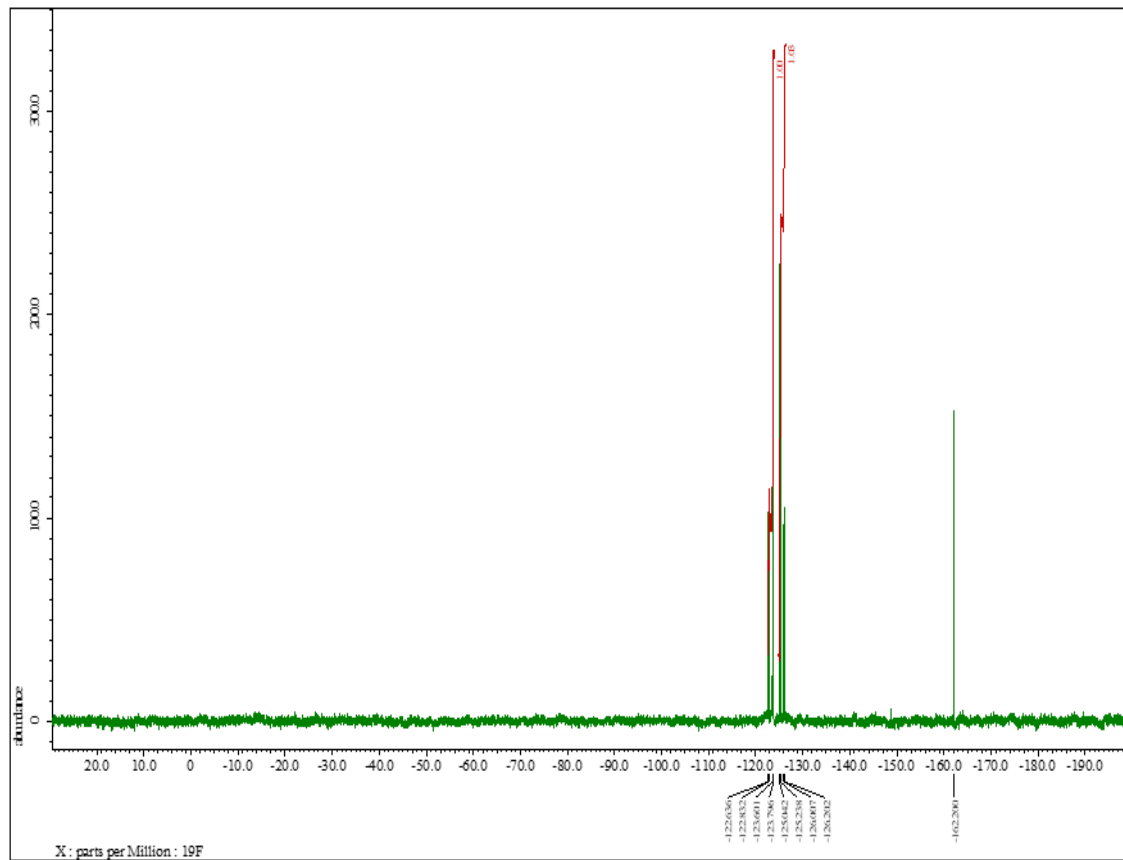

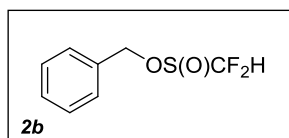

$^1\text{H}$  NMR  
300 MHz  
 $\text{CDCl}_3$

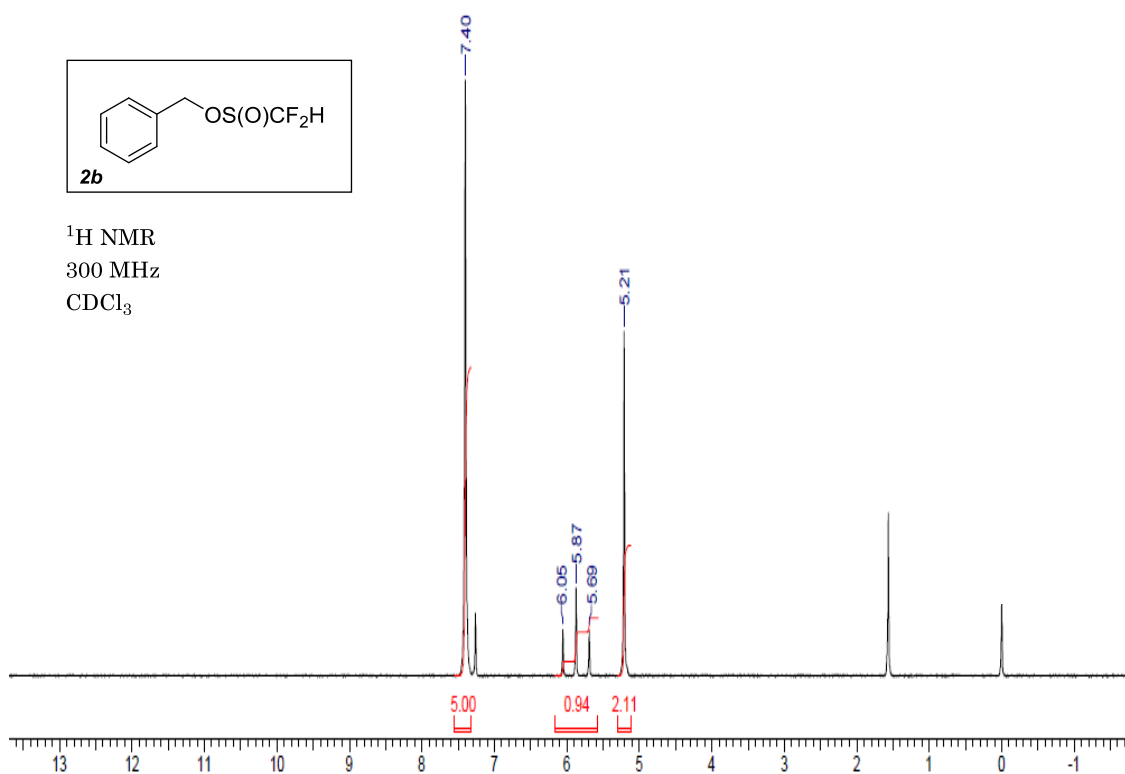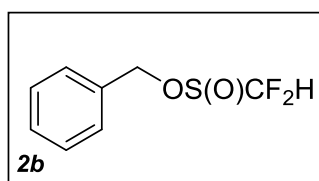

$^{13}\text{C}$  NMR  
126 MHz  
 $\text{CDCl}_3$

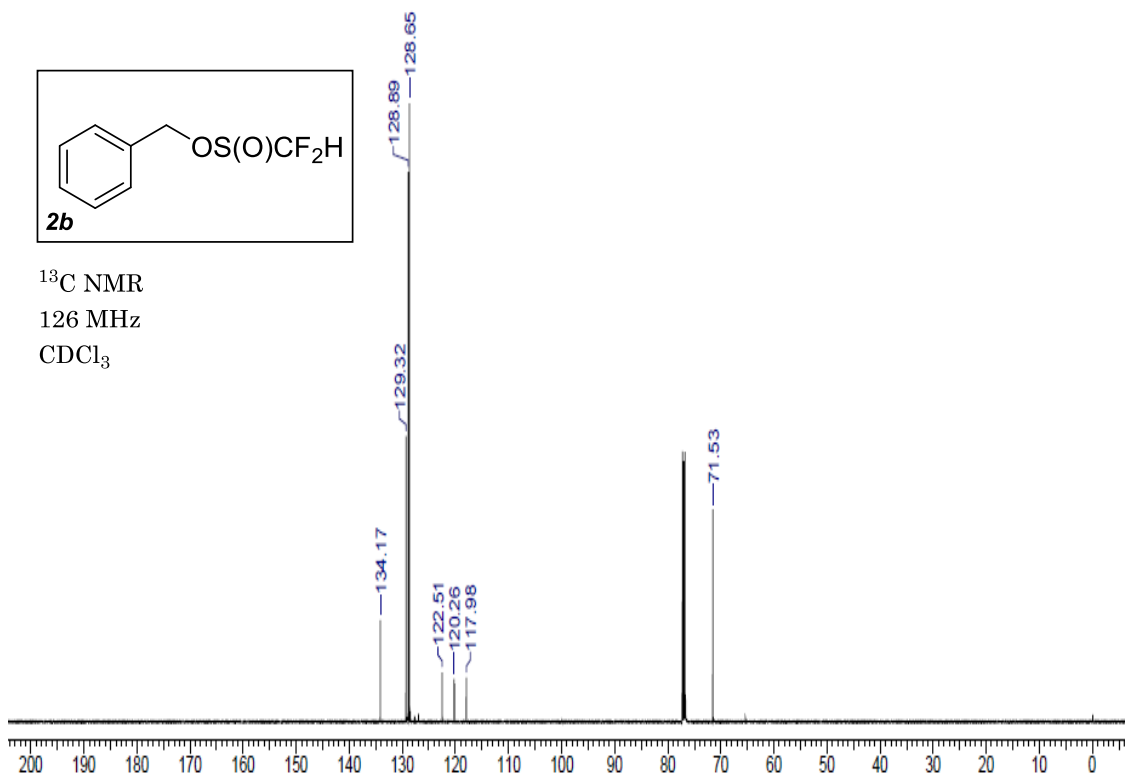



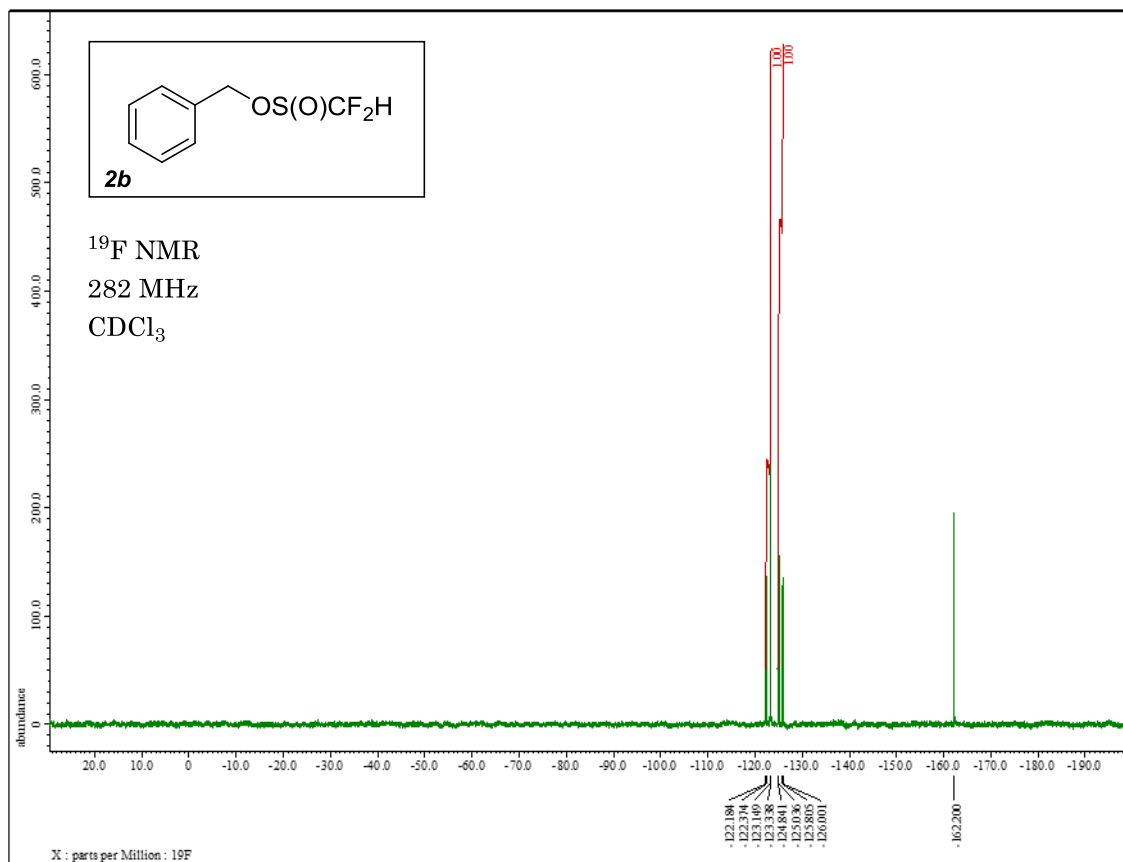

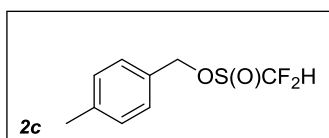

$^1\text{H}$  NMR  
300 MHz  
 $\text{CDCl}_3$

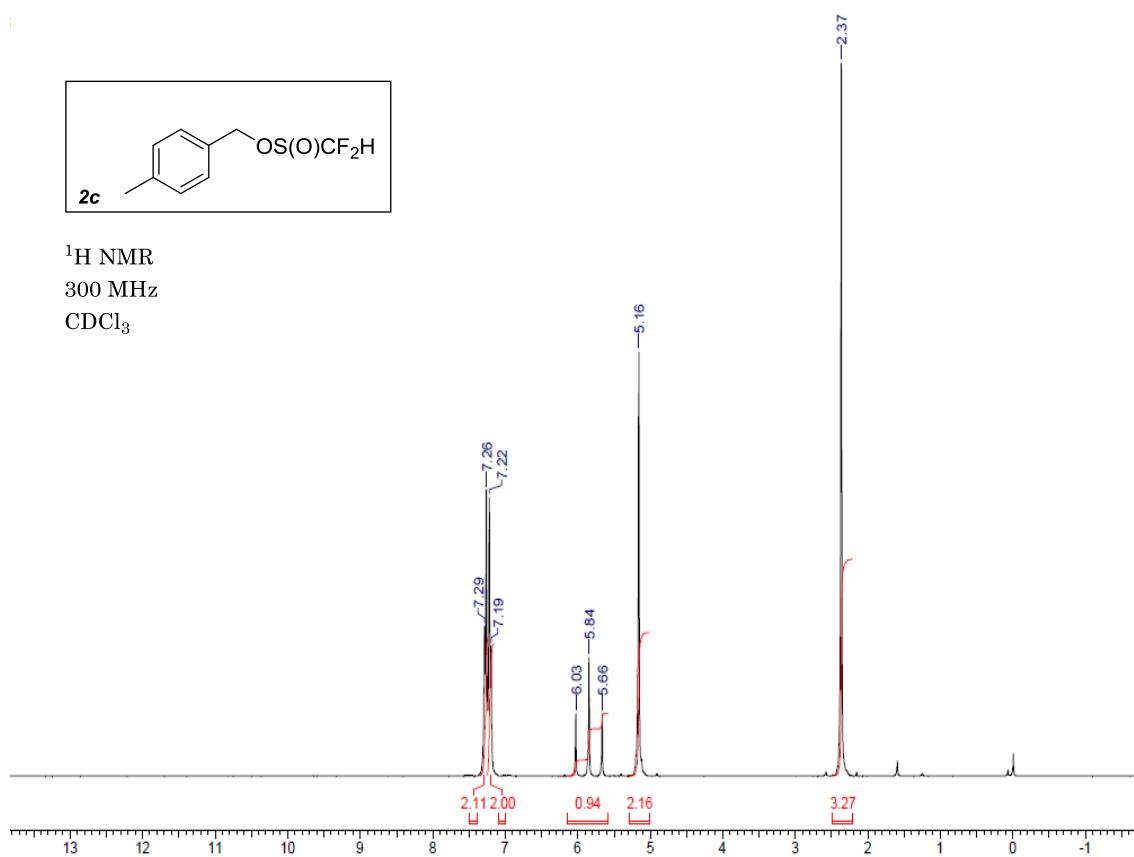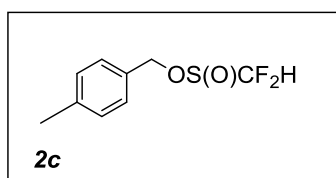

$^{13}\text{C}$  NMR  
126 MHz  
 $\text{CDCl}_3$

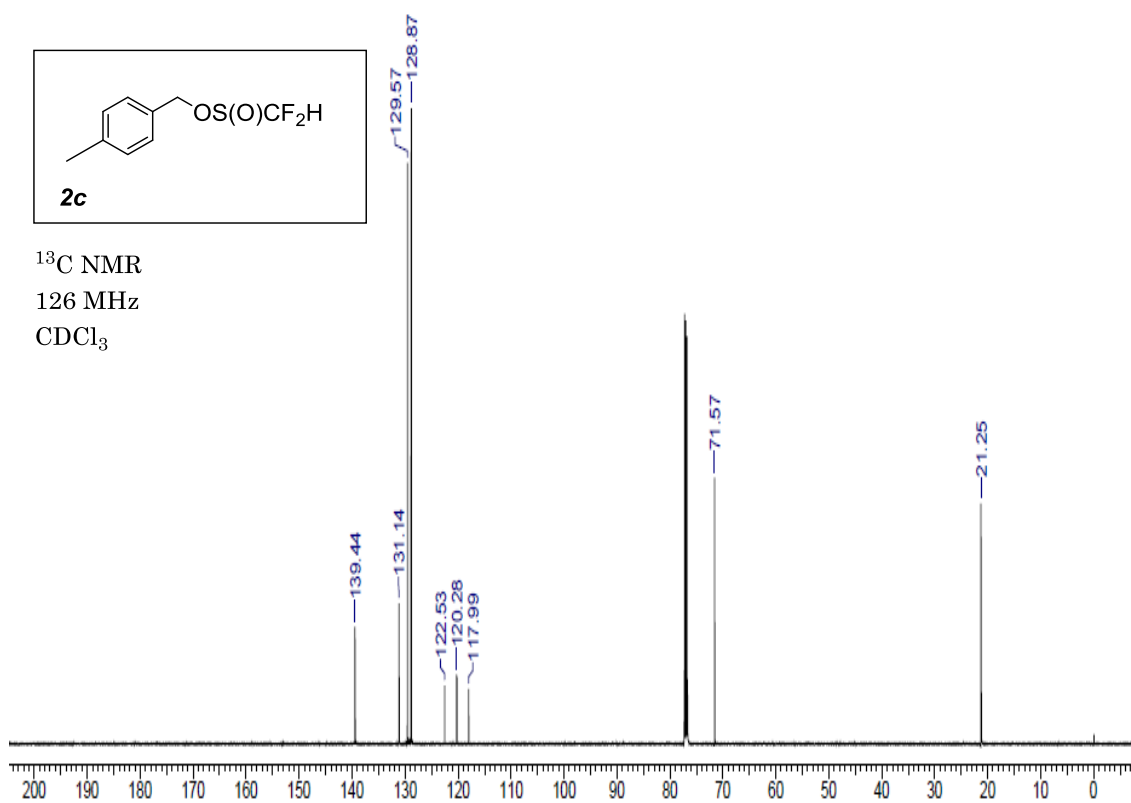

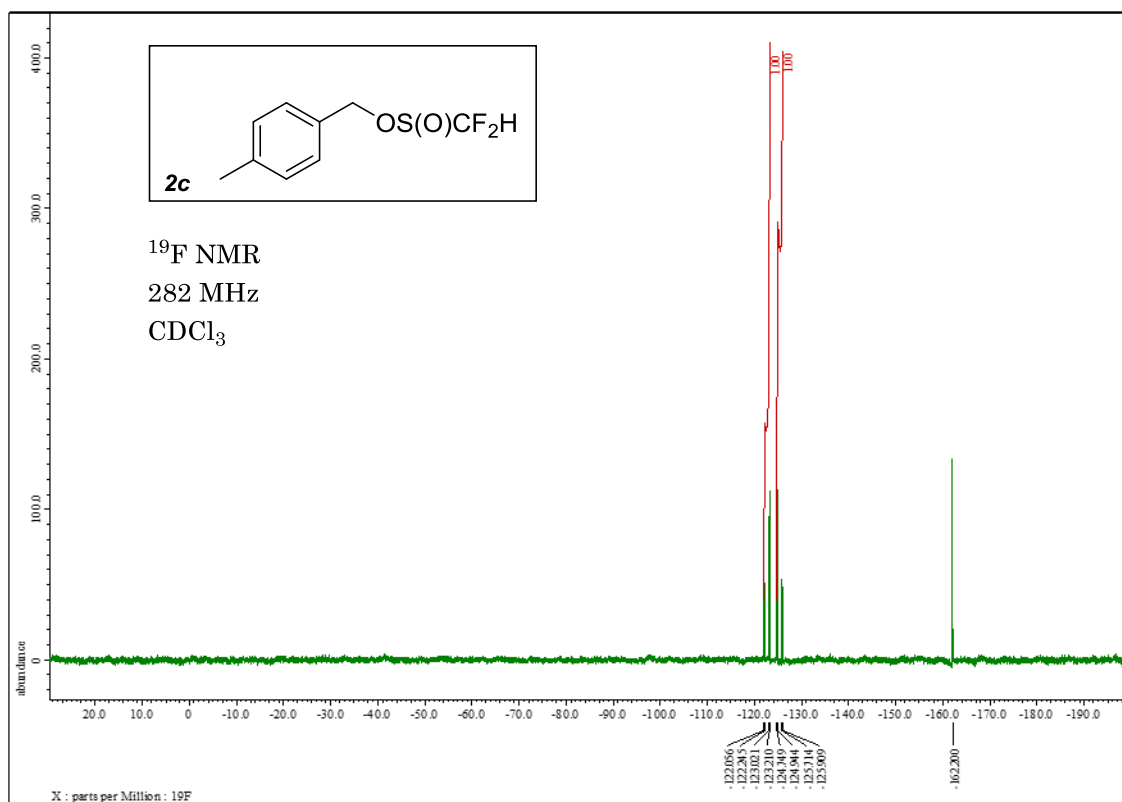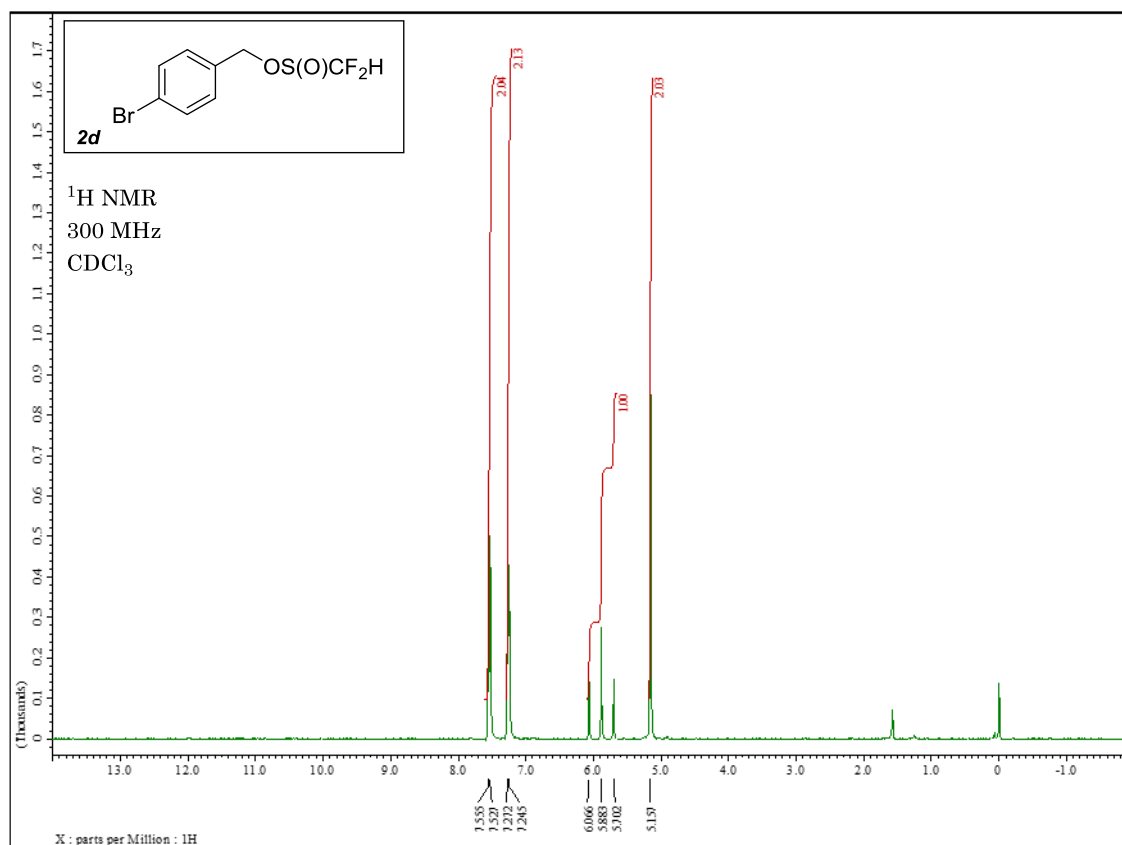

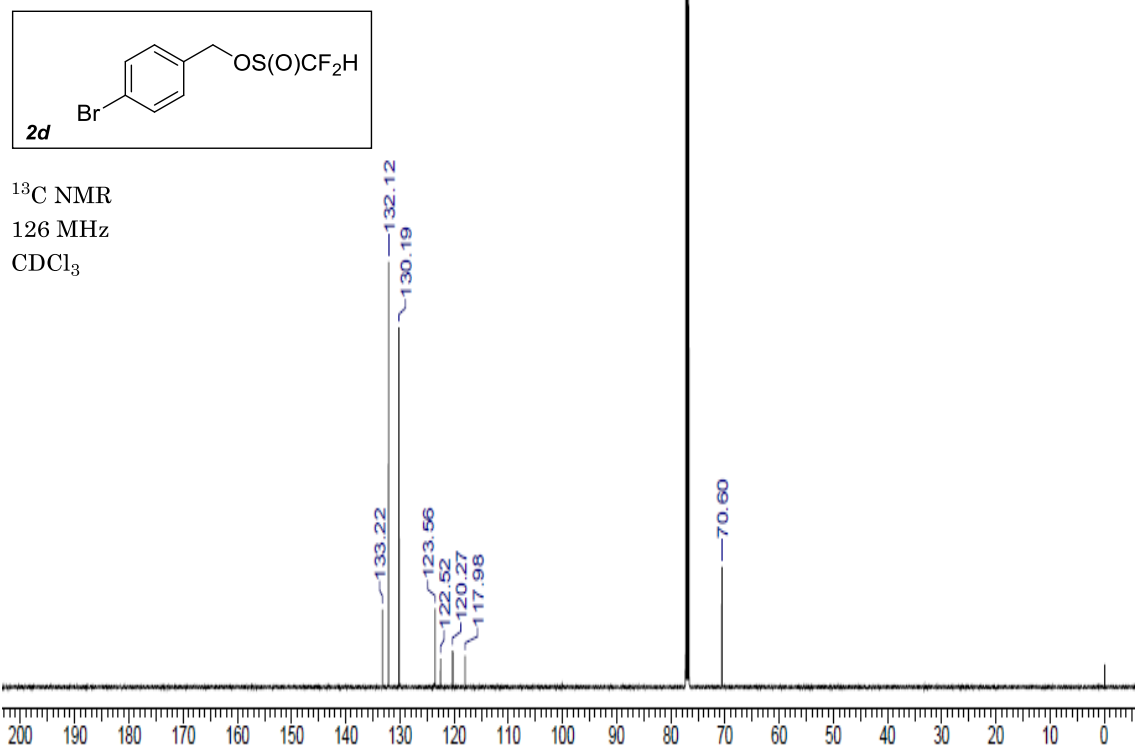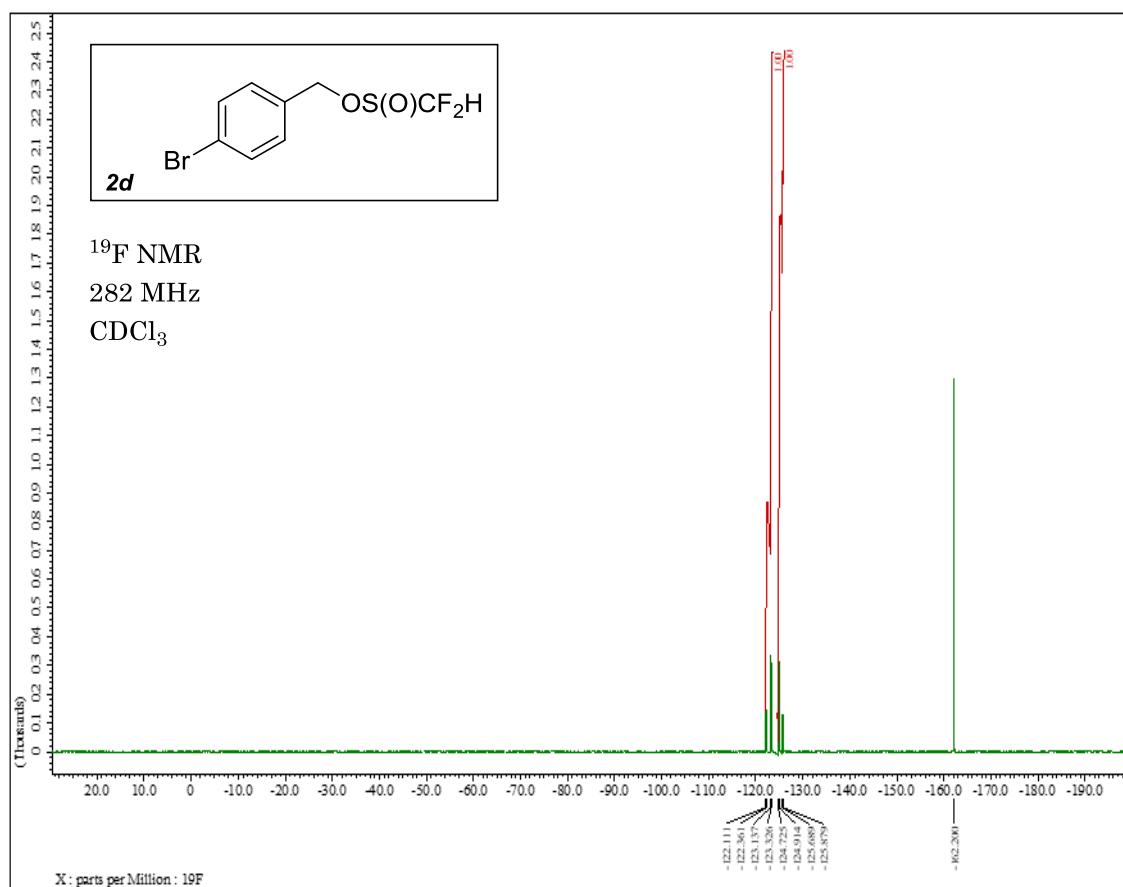

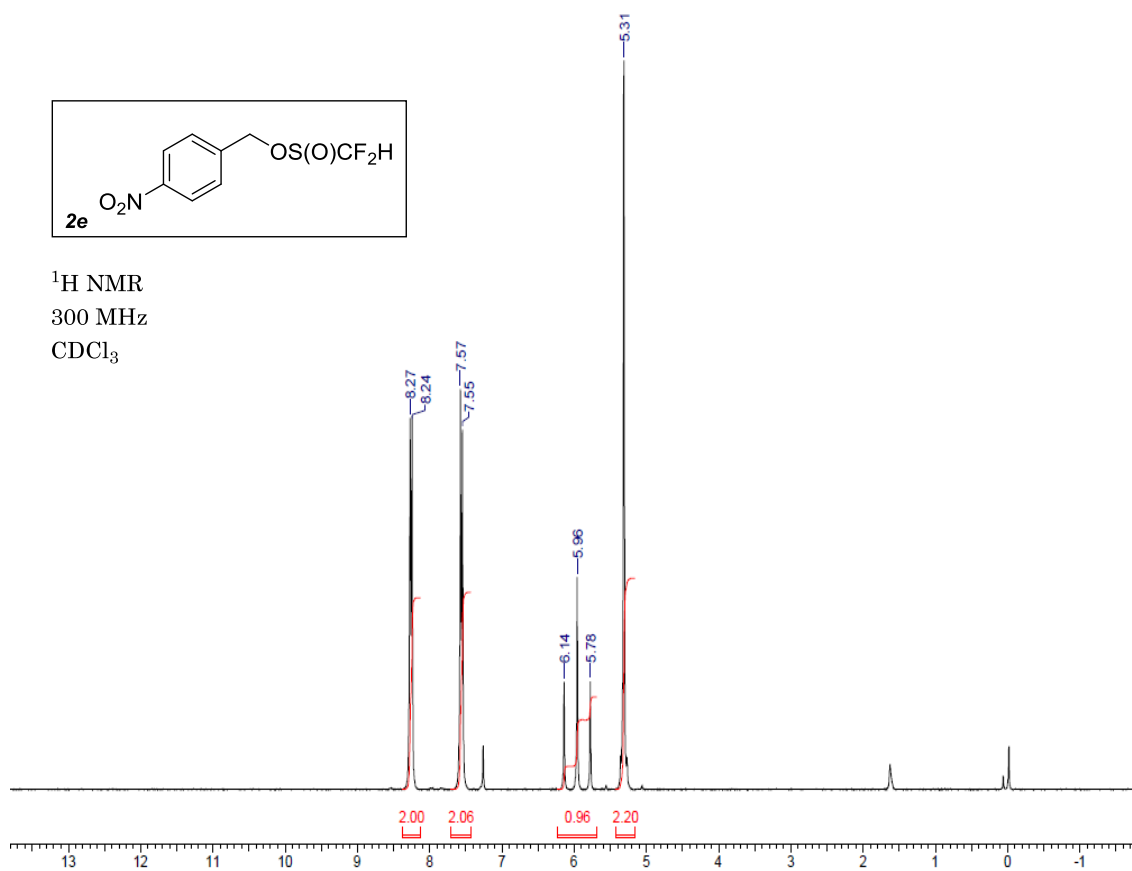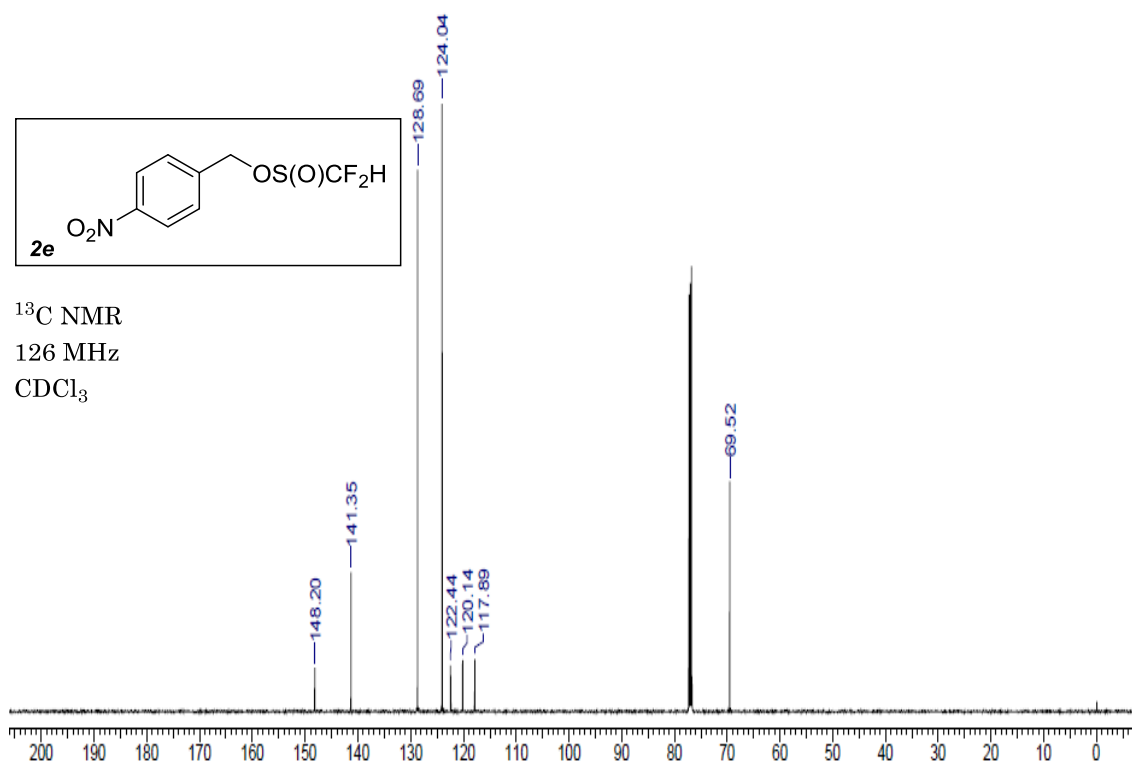

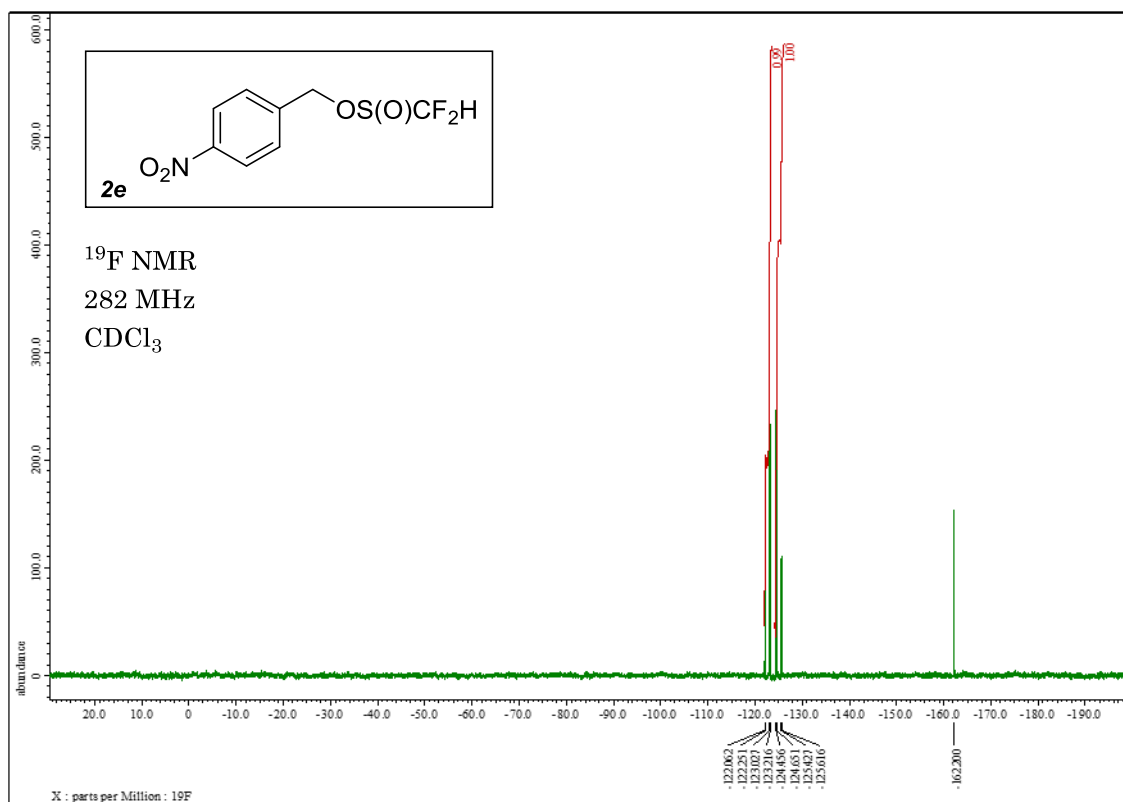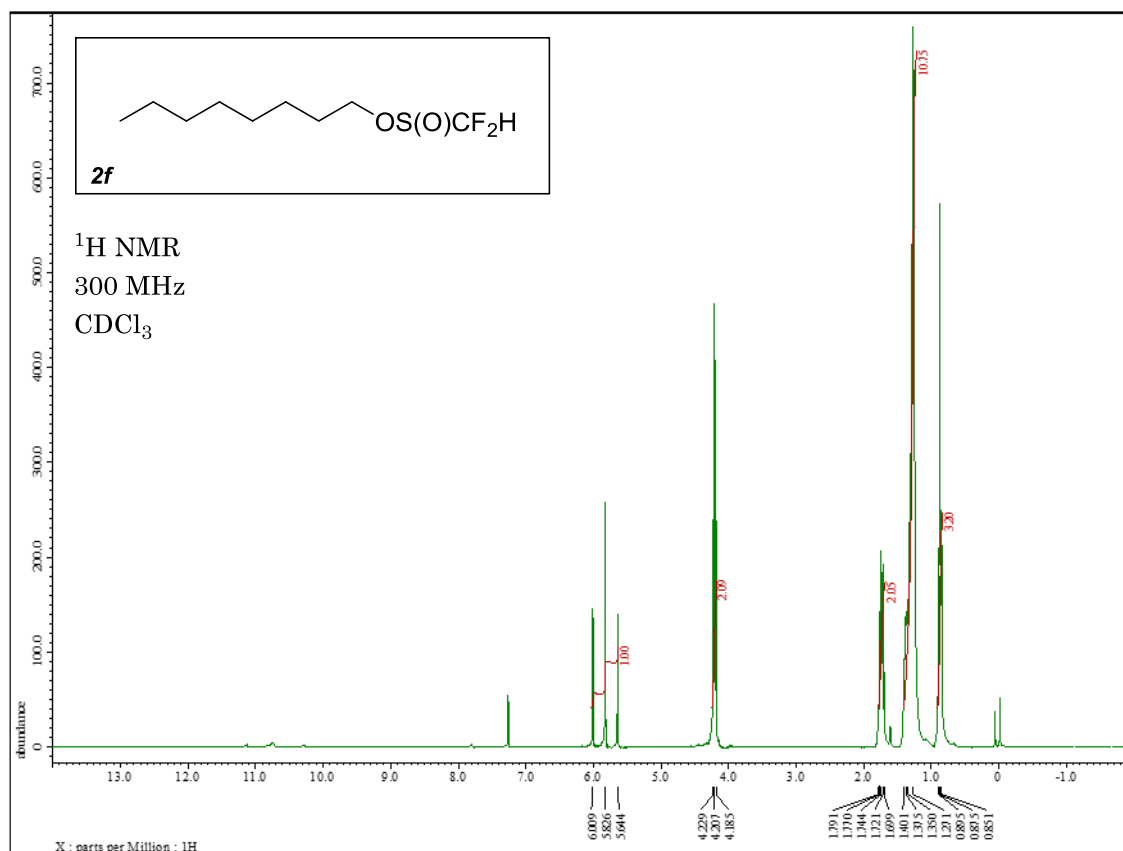

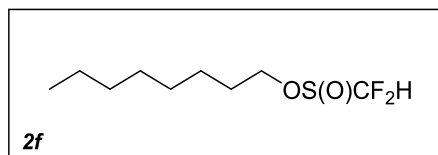

$^{13}\text{C}$  NMR  
 126 MHz  
 $\text{CDCl}_3$

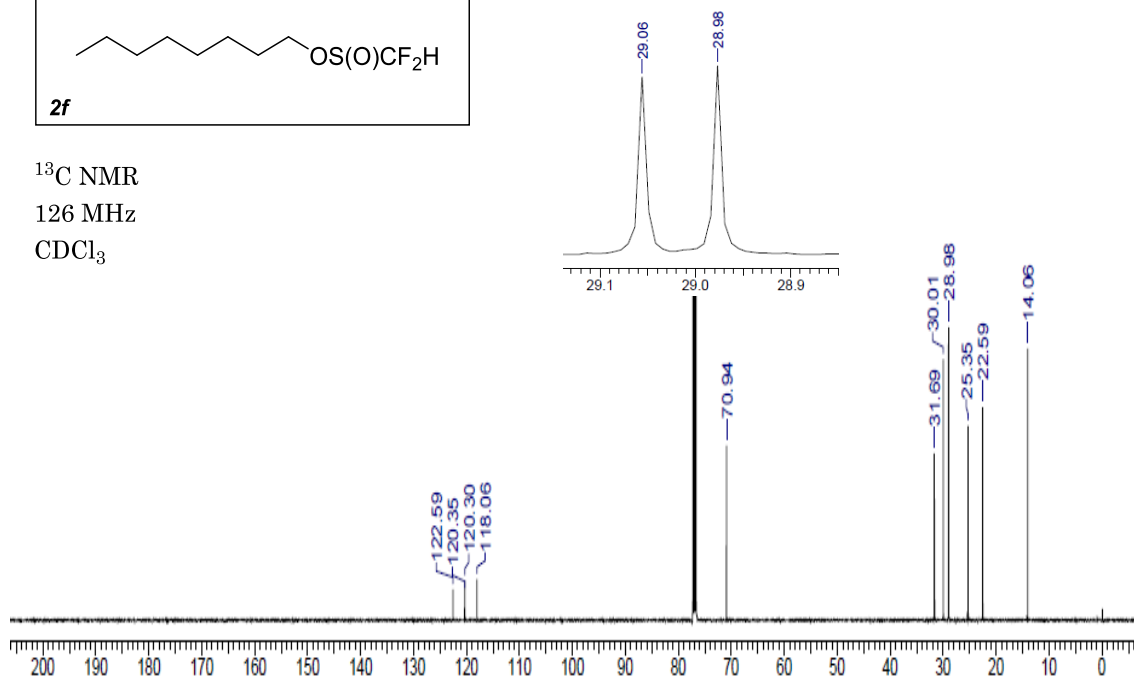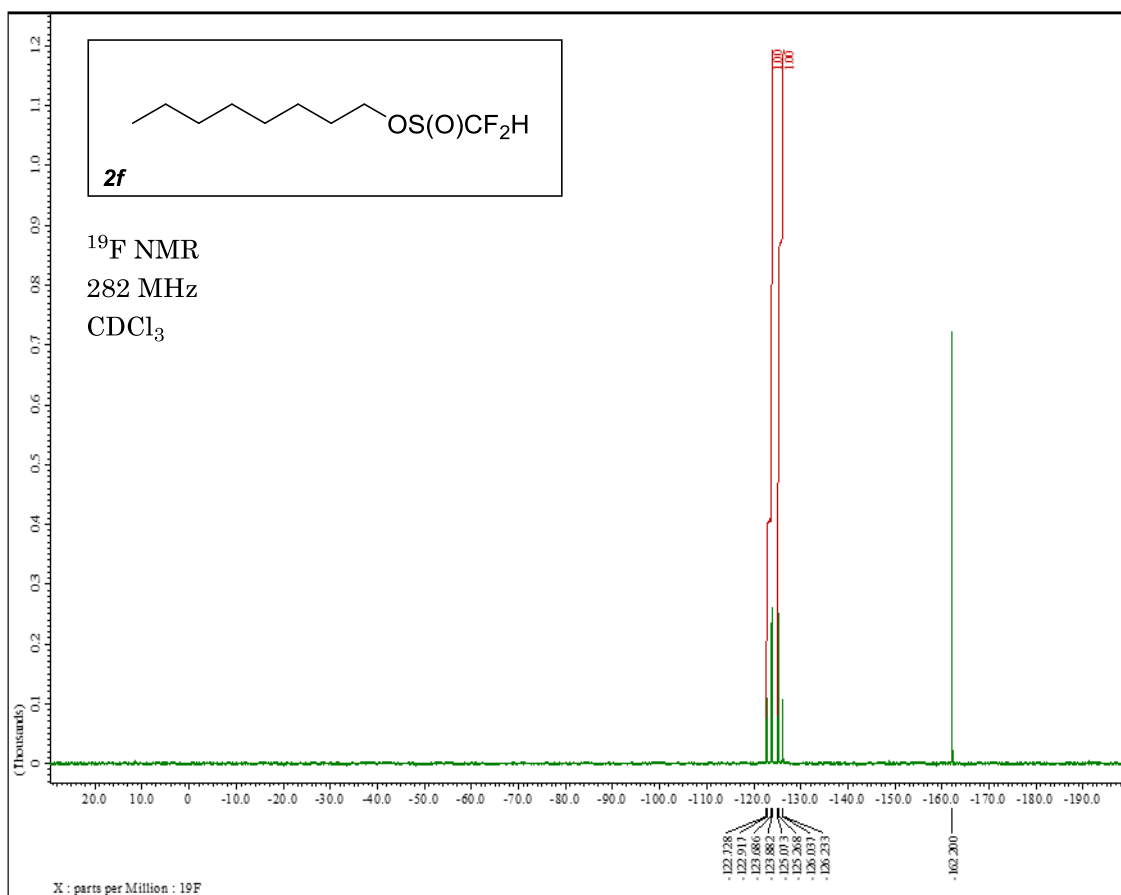

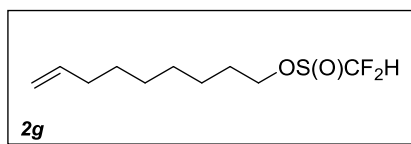

<sup>1</sup>H NMR  
 300 MHz  
 CDCl<sub>3</sub>

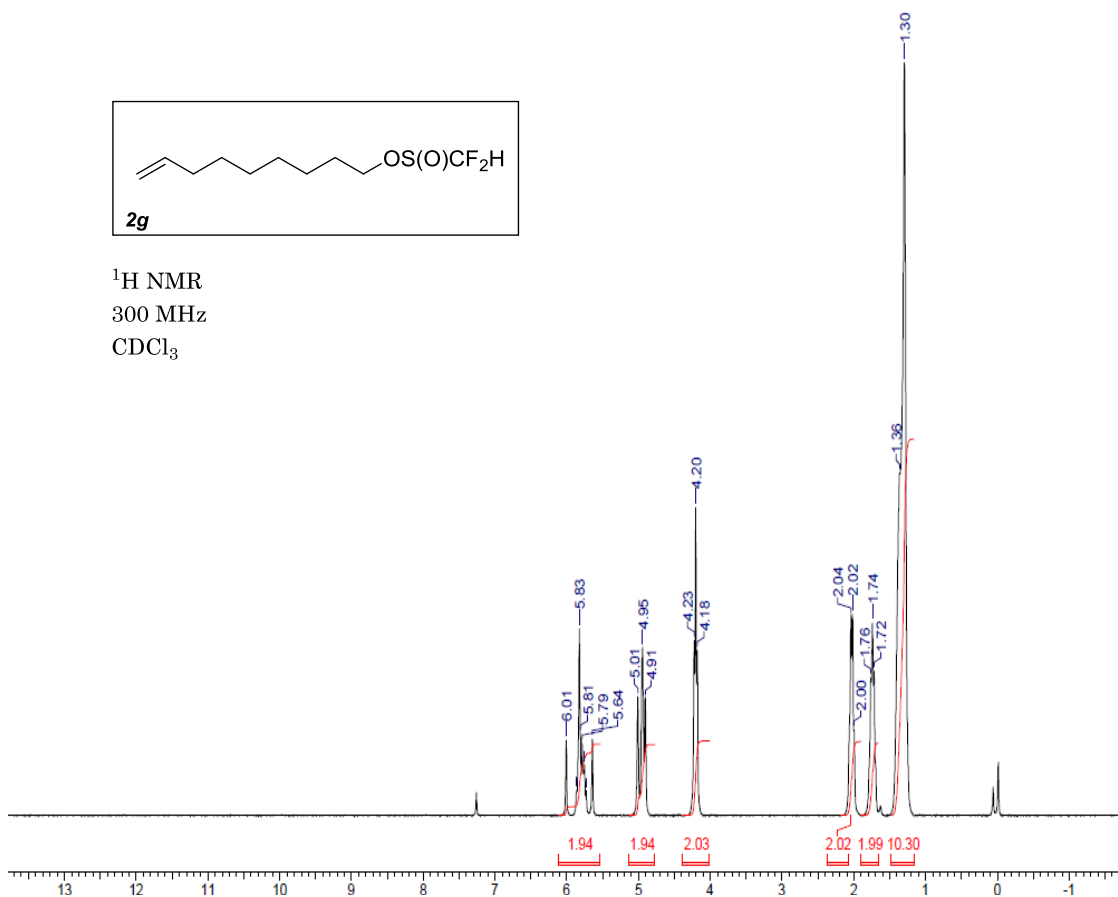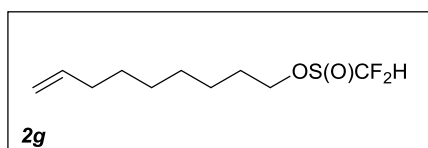

<sup>13</sup>C NMR  
 126 MHz  
 CDCl<sub>3</sub>

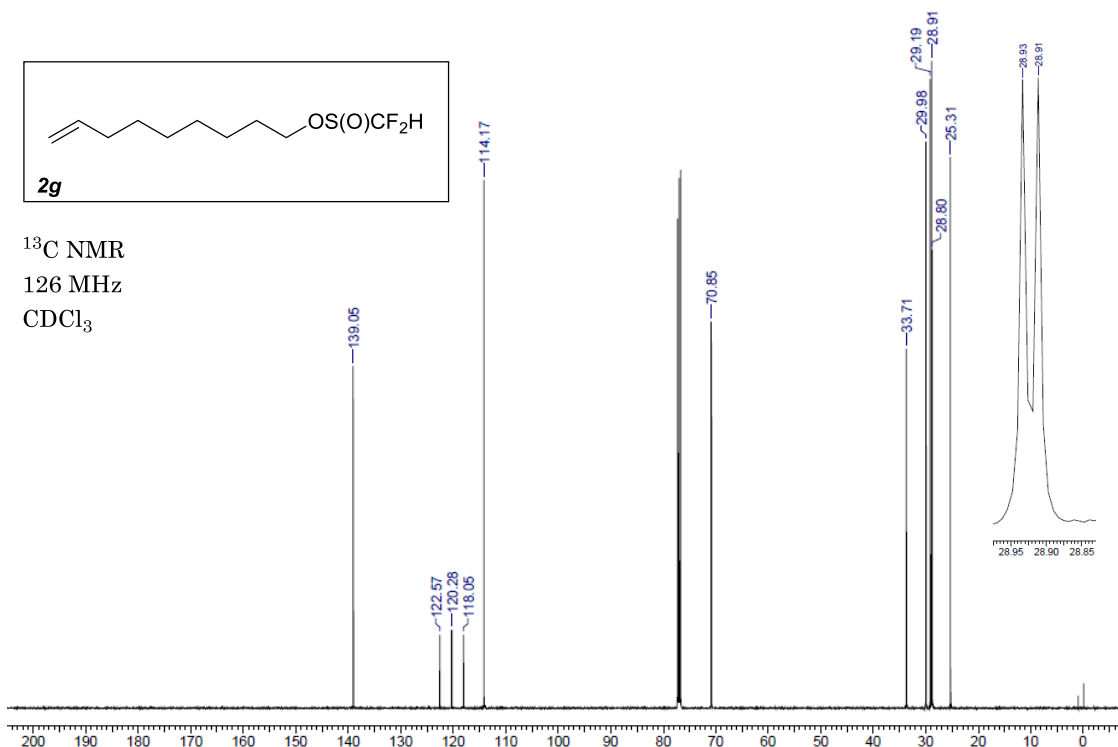



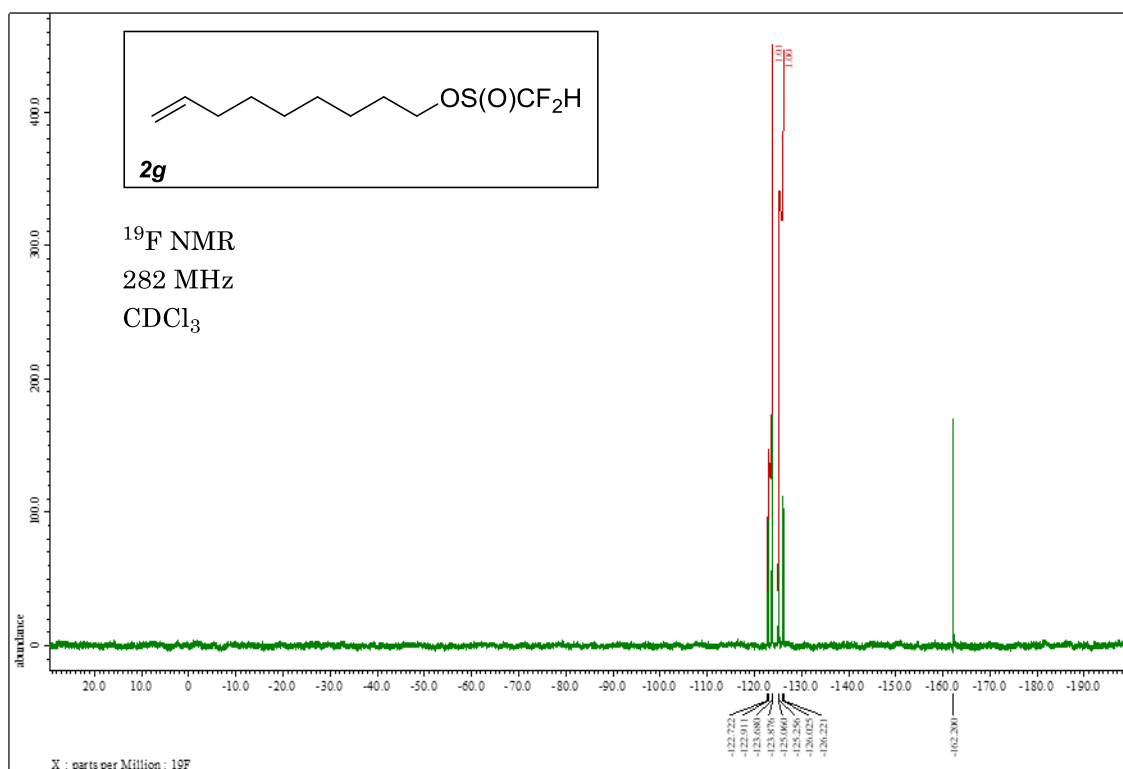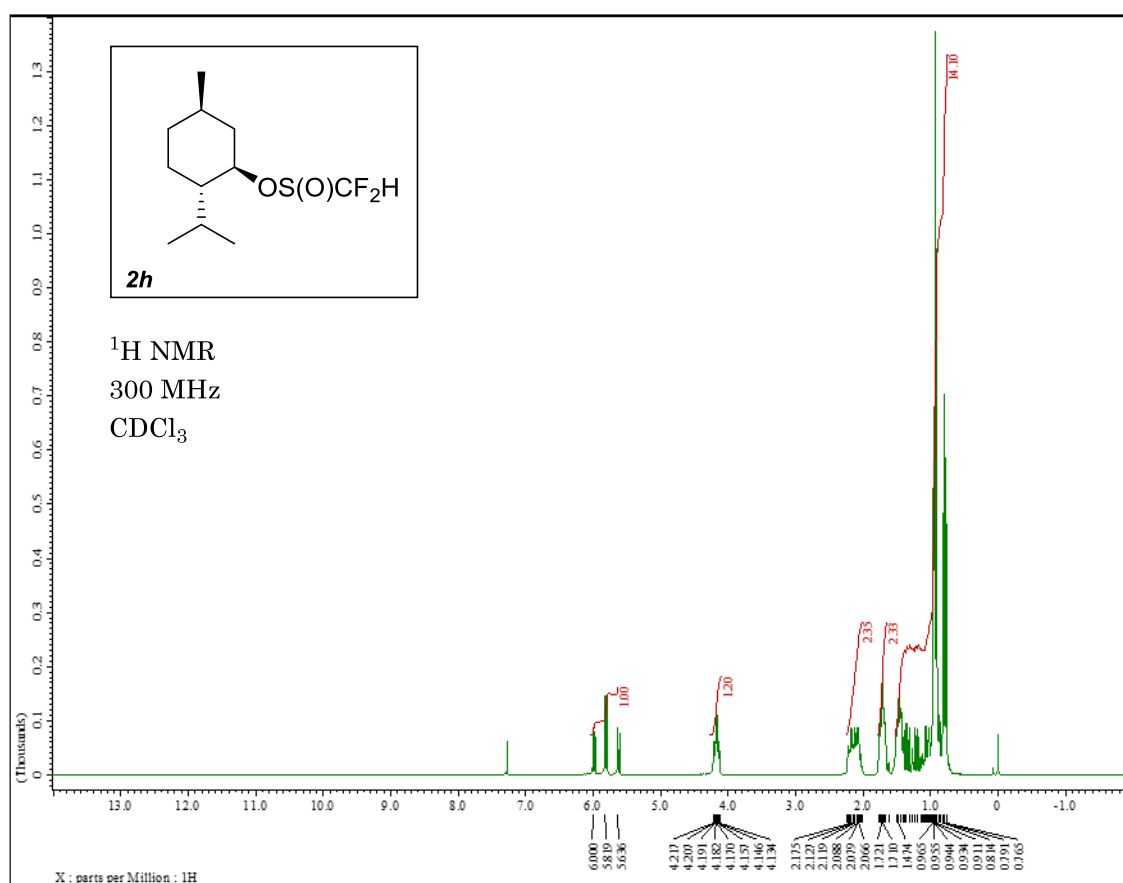

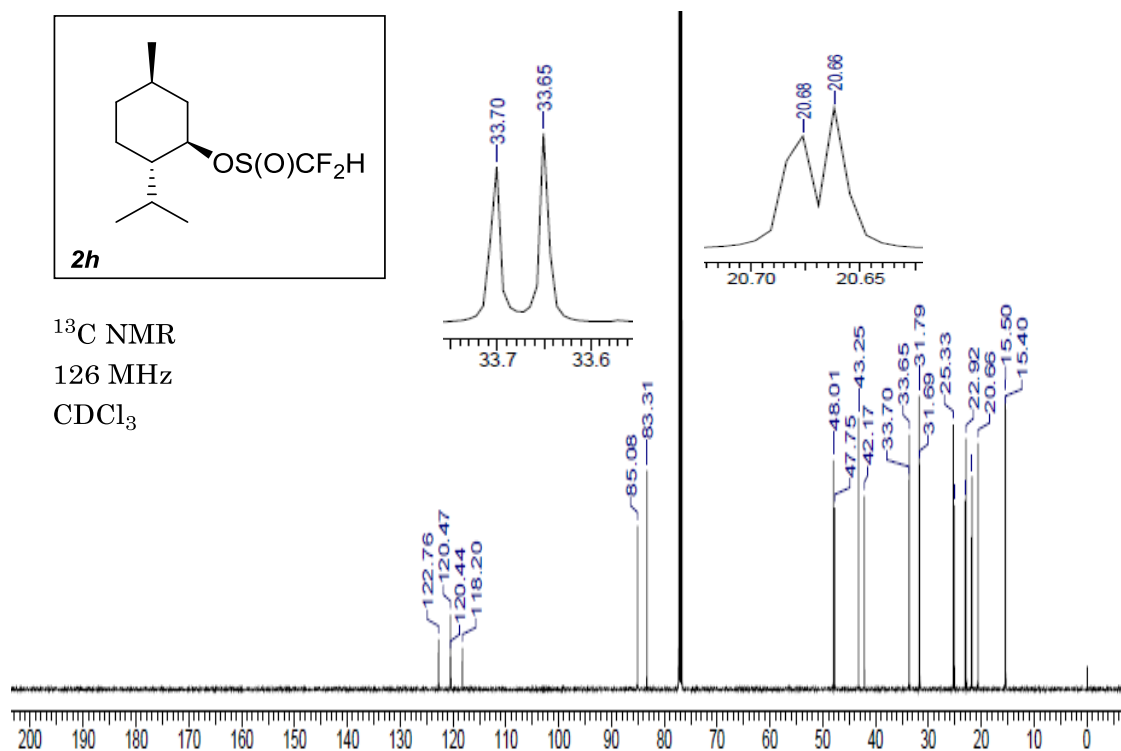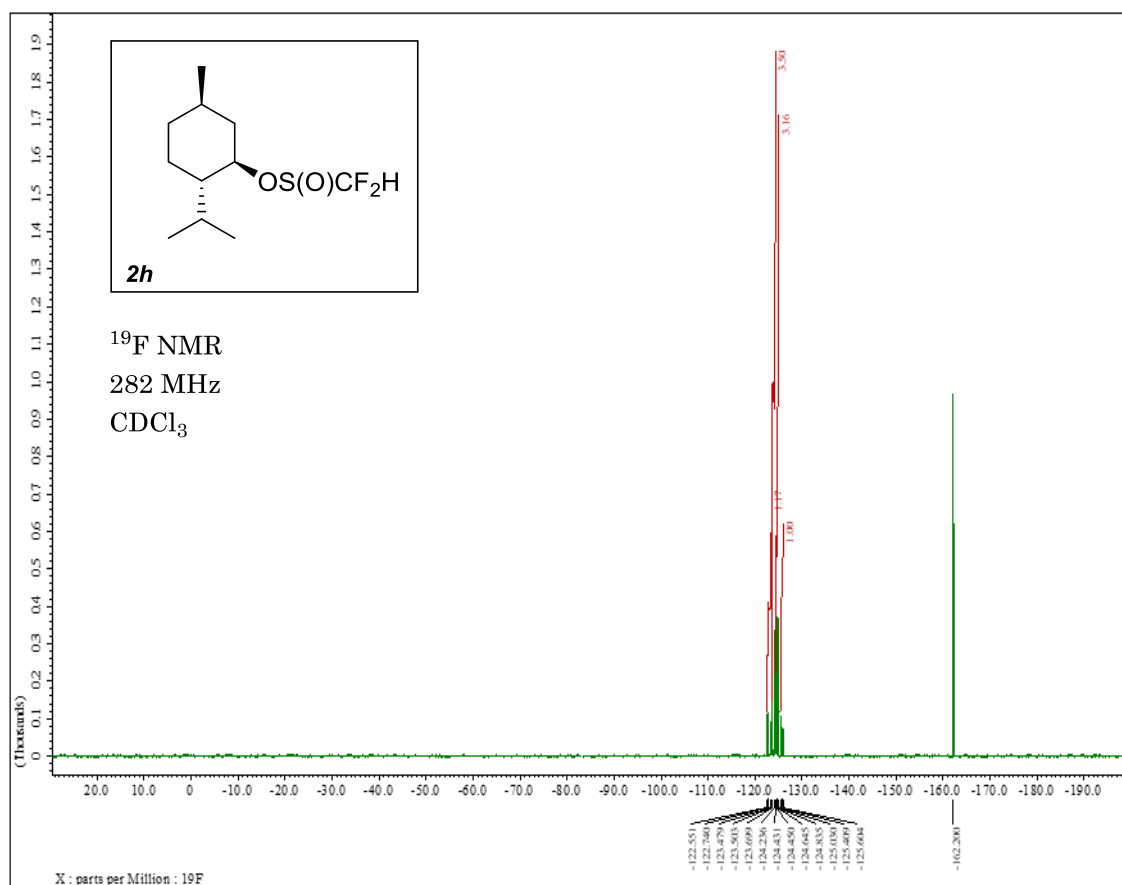

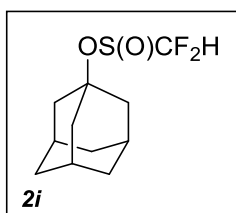

$^1\text{H}$  NMR  
 300 MHz  
 $\text{CDCl}_3$

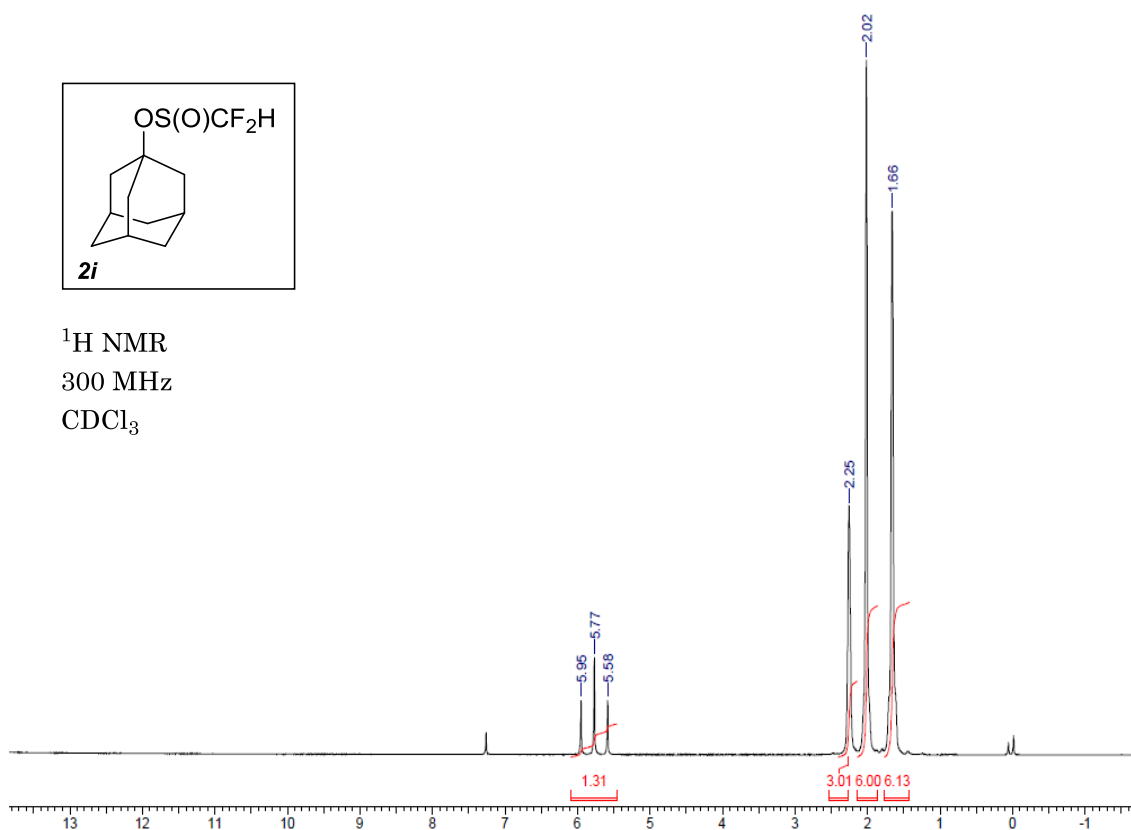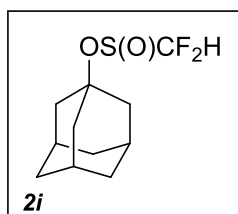

$^{13}\text{C}$  NMR  
 126 MHz  
 $\text{CDCl}_3$

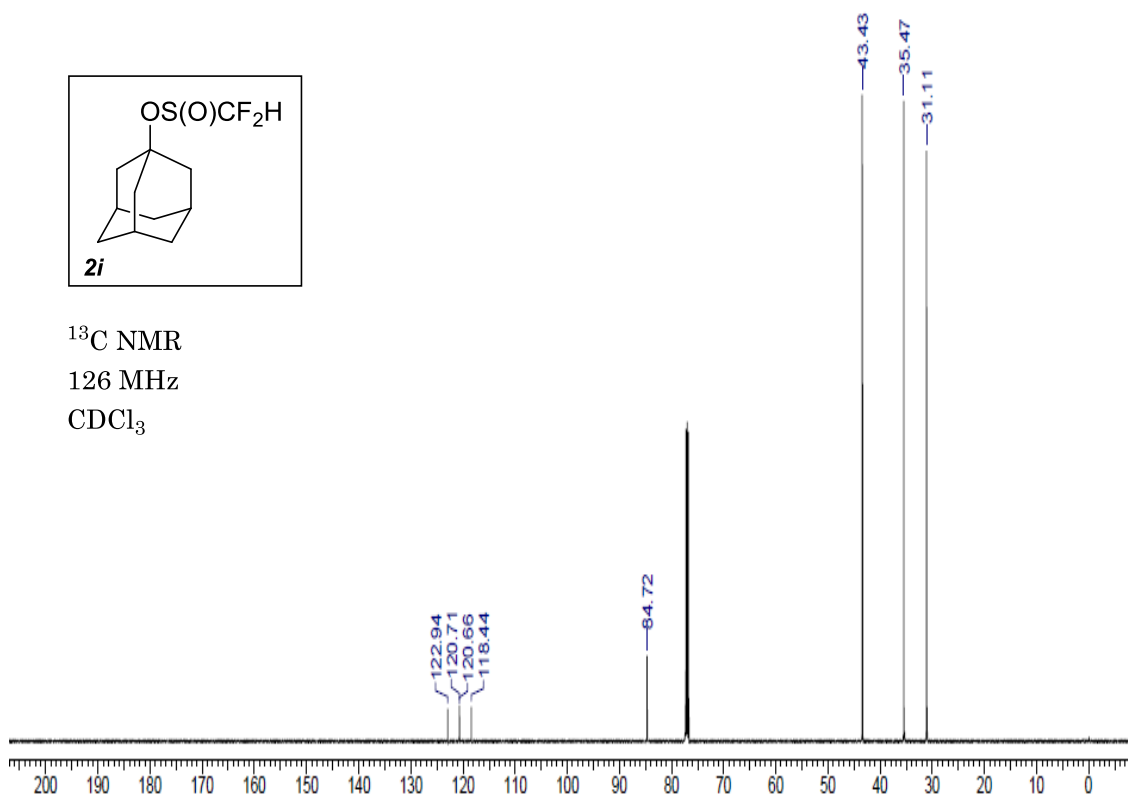

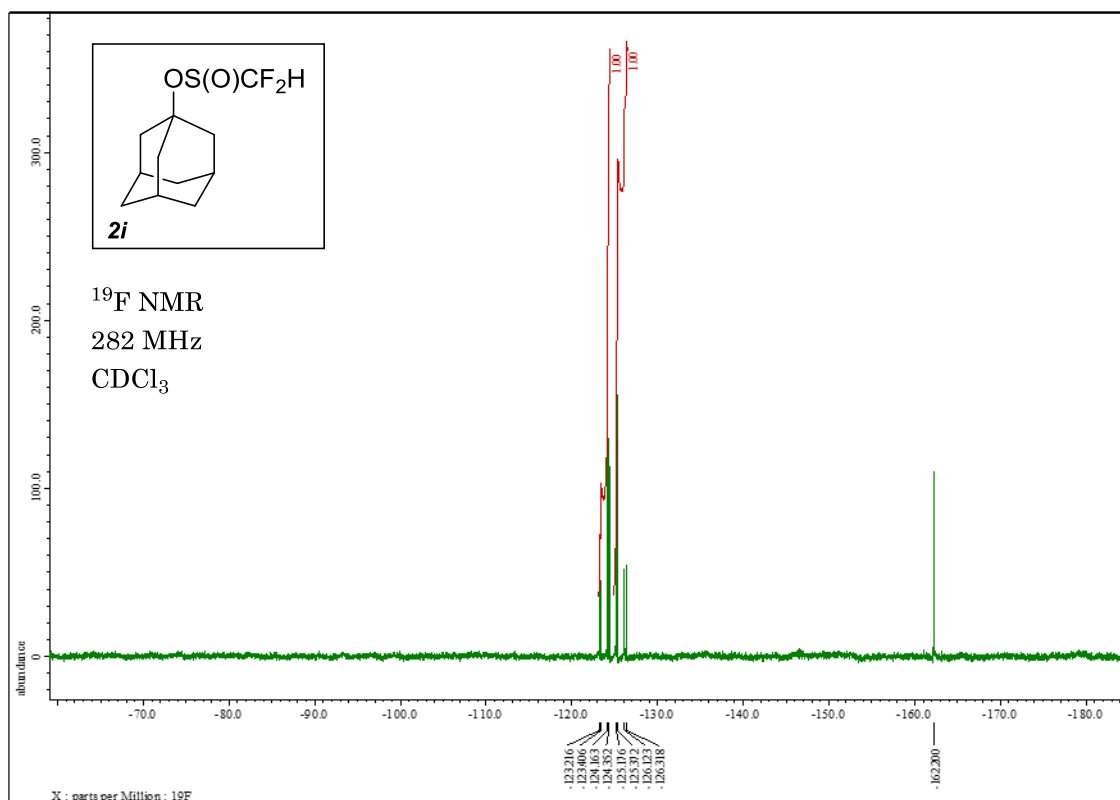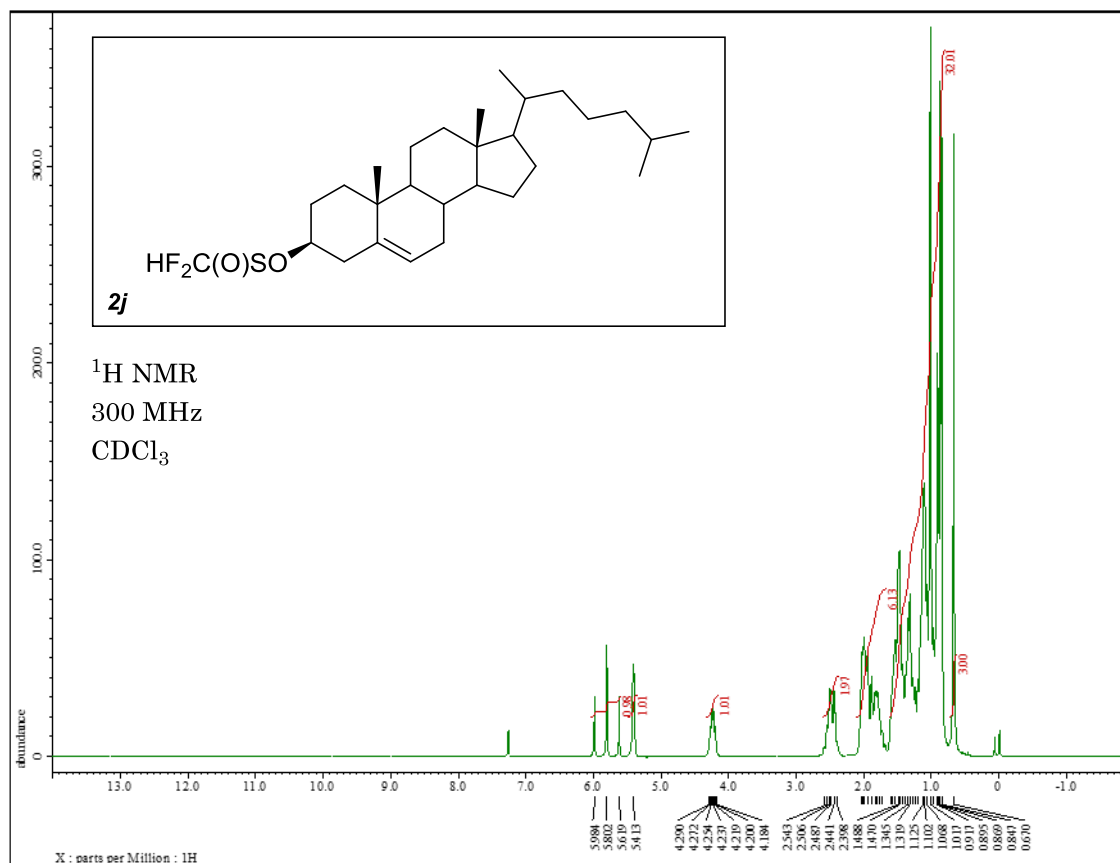

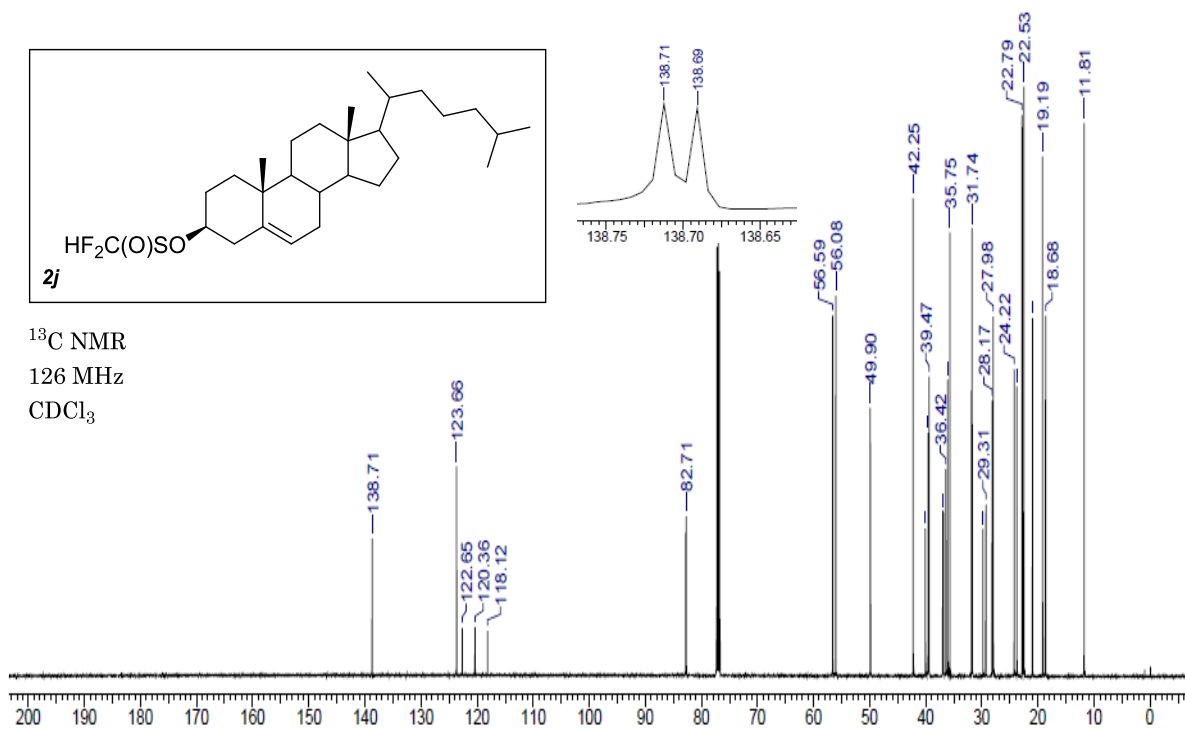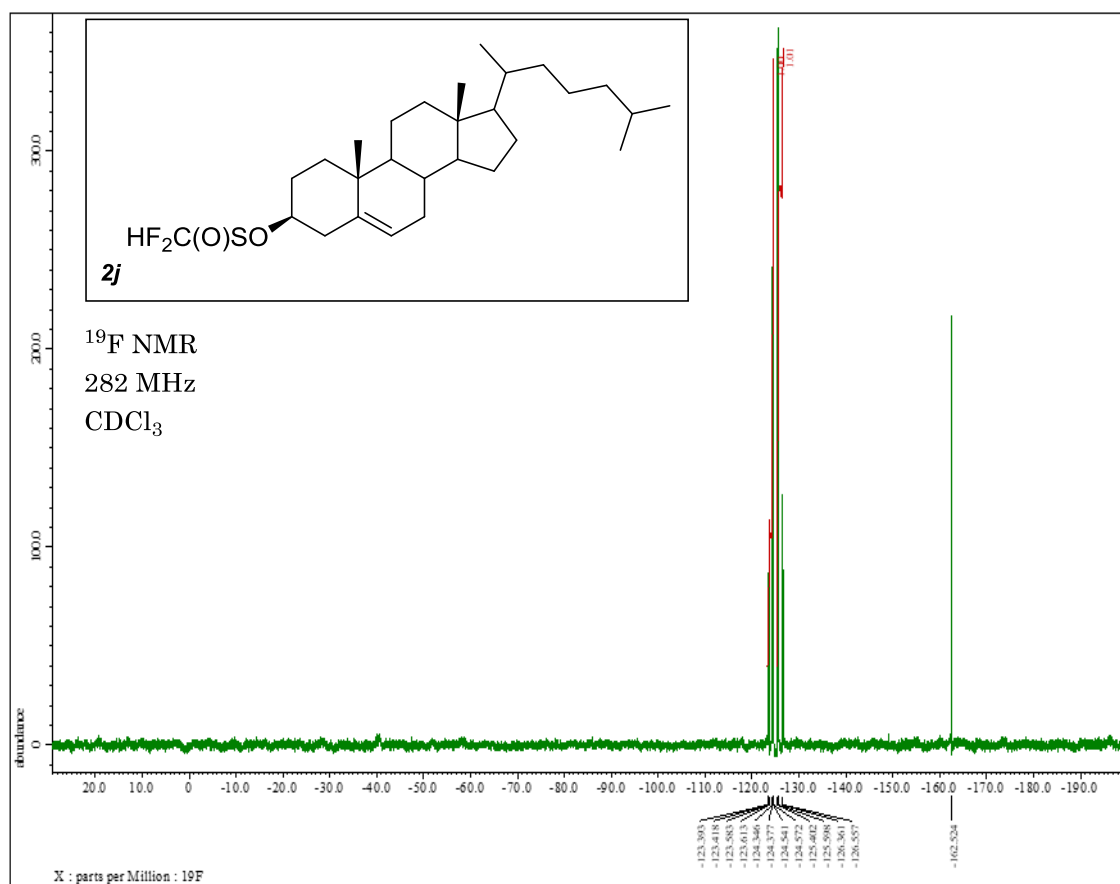

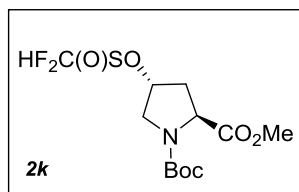

$^1\text{H}$  NMR  
 300 MHz  
 $\text{CDCl}_3$

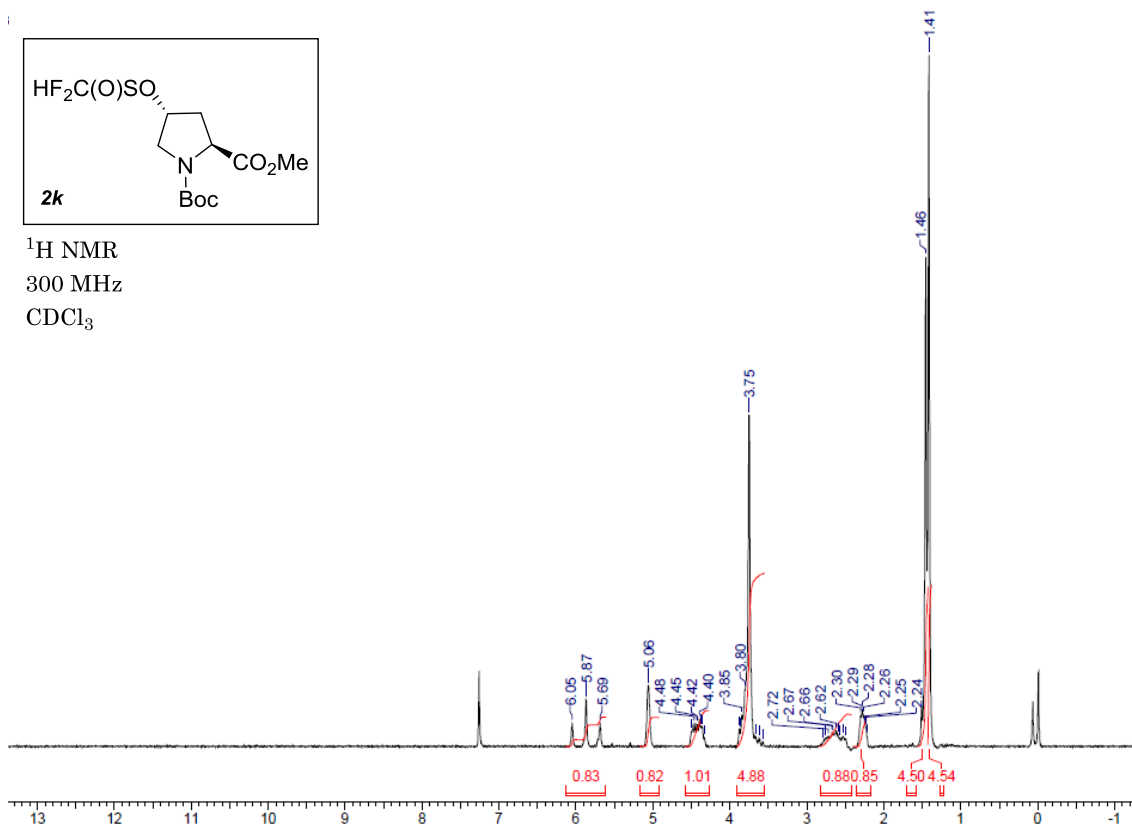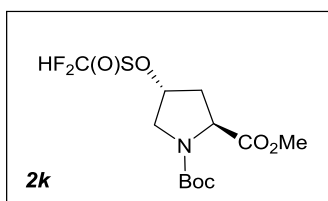

$^{13}\text{C}$  NMR  
 126 MHz  
 $\text{CDCl}_3$

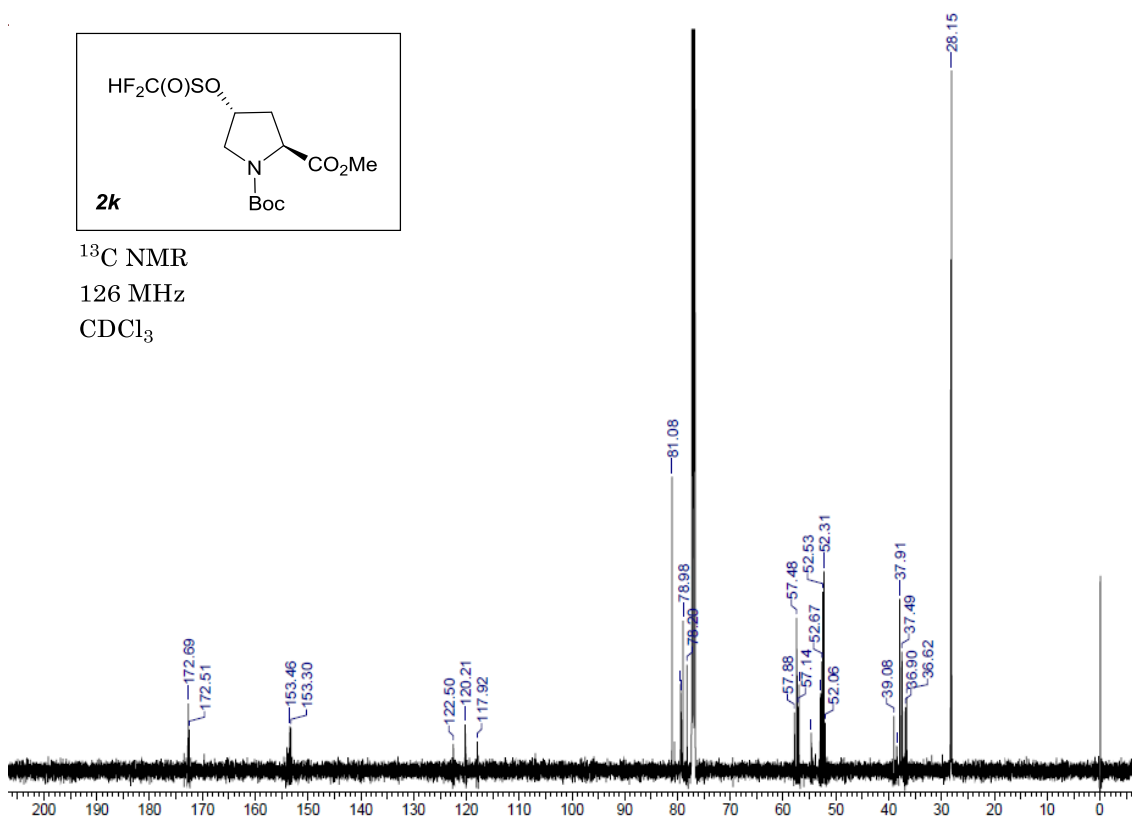

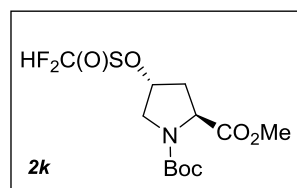

$^{19}\text{F}$  NMR

282 MHz

$\text{CDCl}_3$

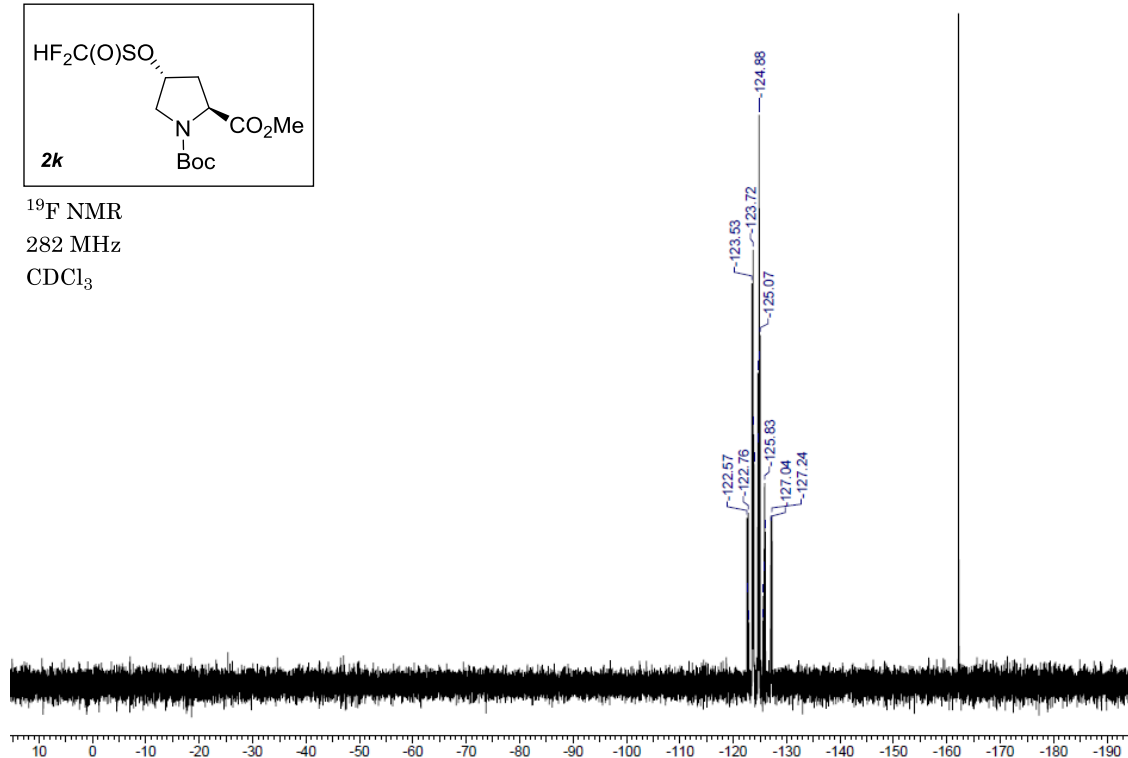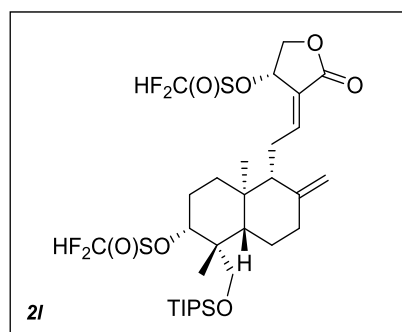

$^1\text{H}$  NMR

300 MHz

$\text{CDCl}_3$

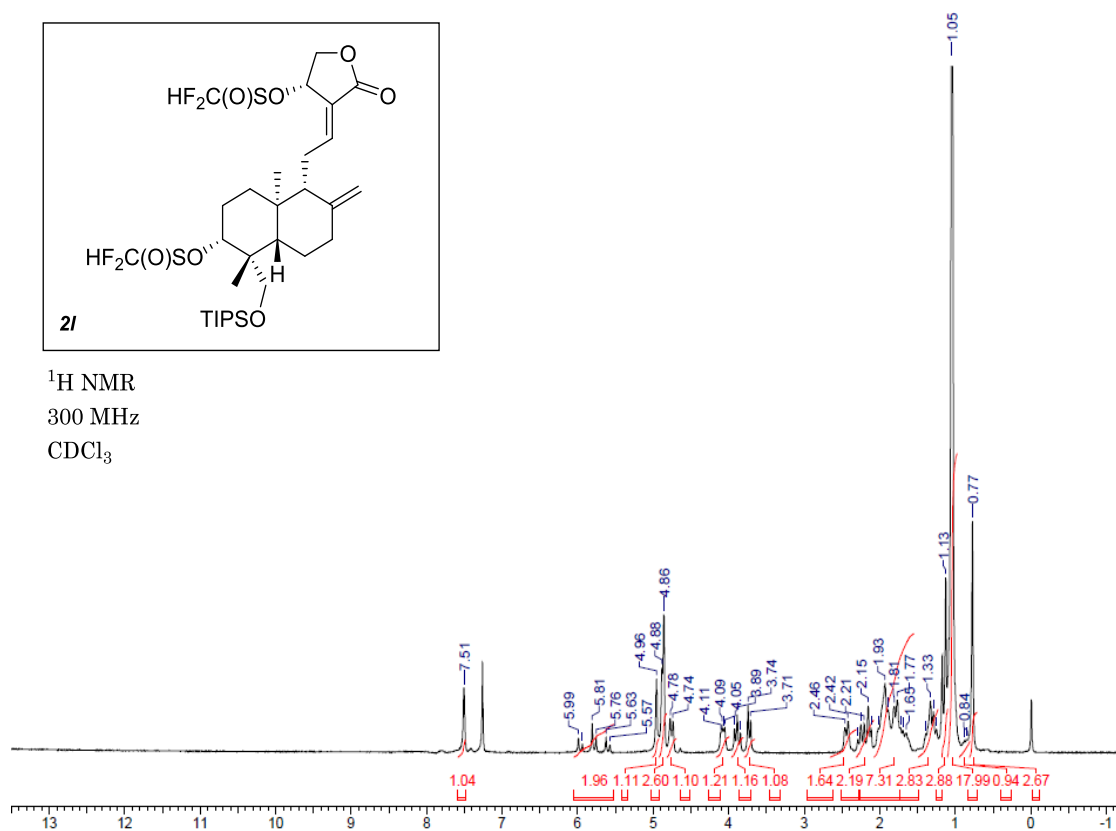

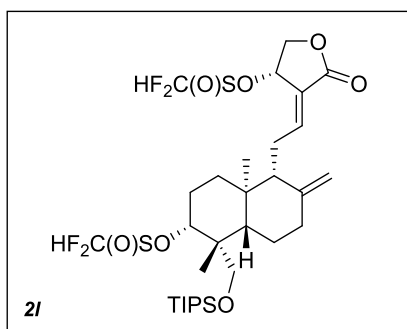

$^{13}\text{C}$  NMR  
126 MHz  
 $\text{CDCl}_3$

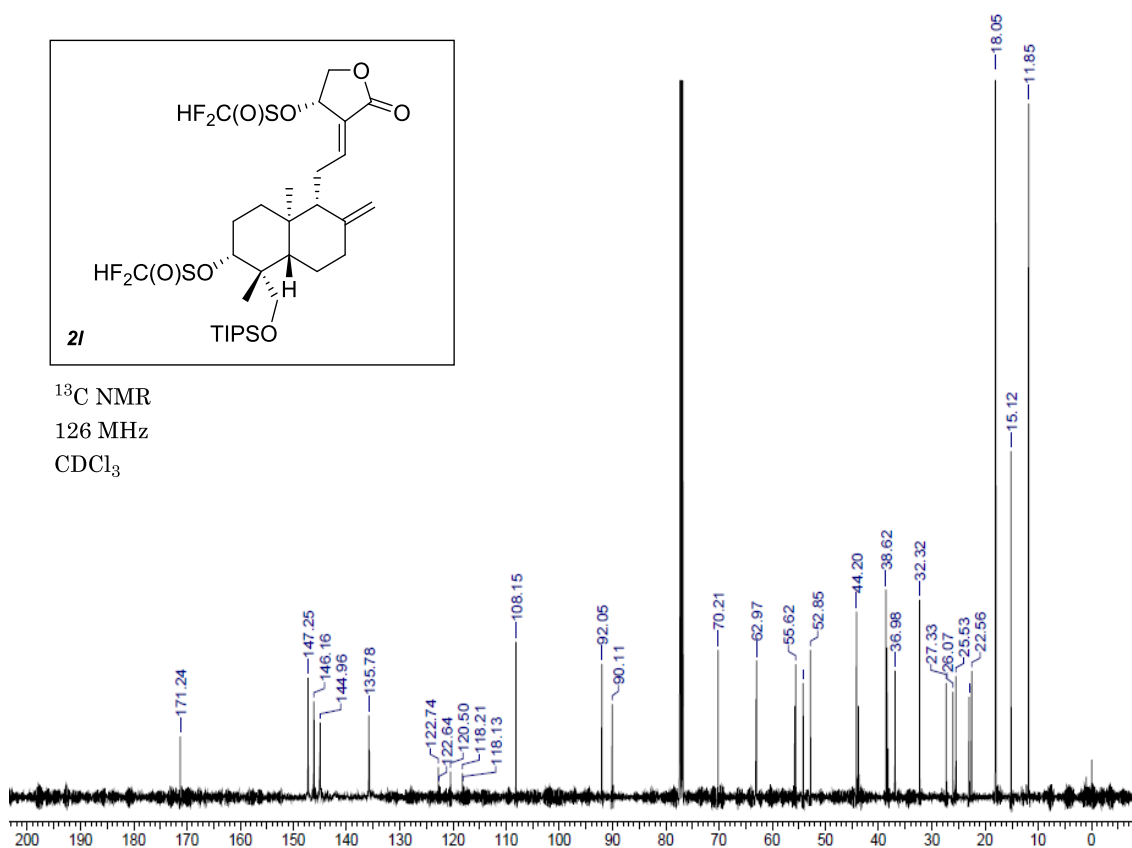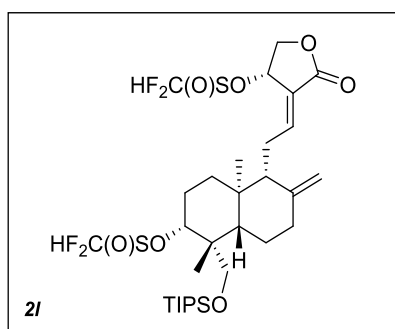

$^{19}\text{F}$  NMR  
282 MHz  
 $\text{CDCl}_3$

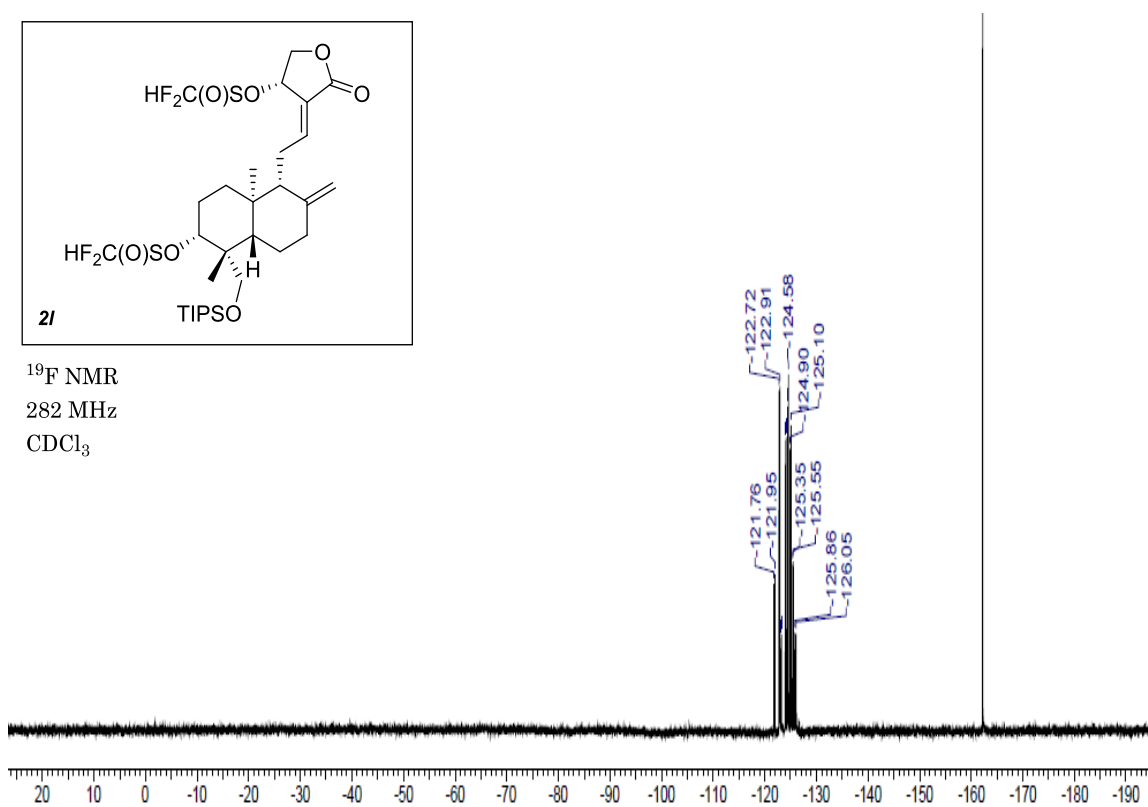



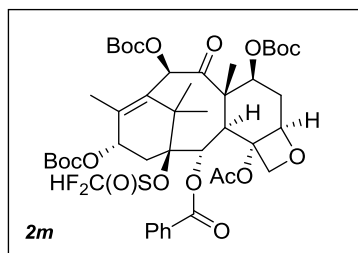

$^{19}\text{F}$  NMR  
282 MHz  
 $\text{CDCl}_3$

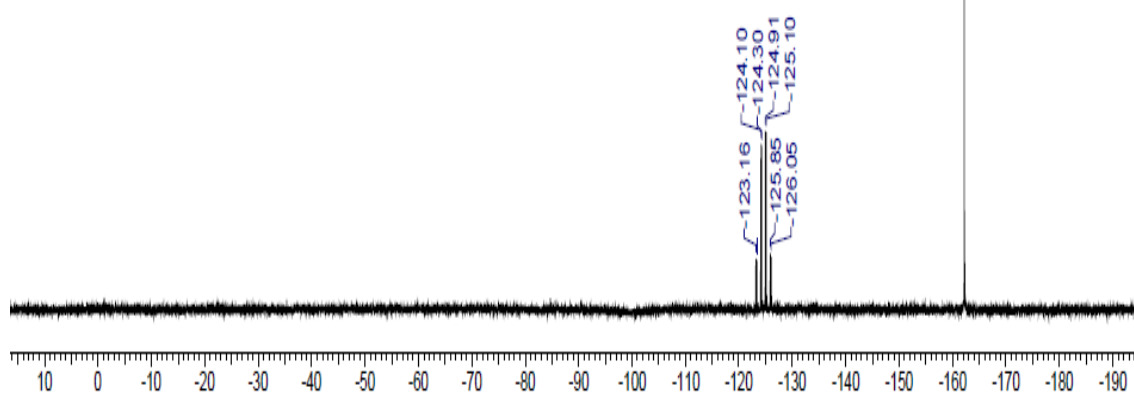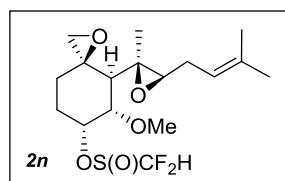

$^1\text{H}$  NMR  
500 MHz  
 $\text{CDCl}_3$

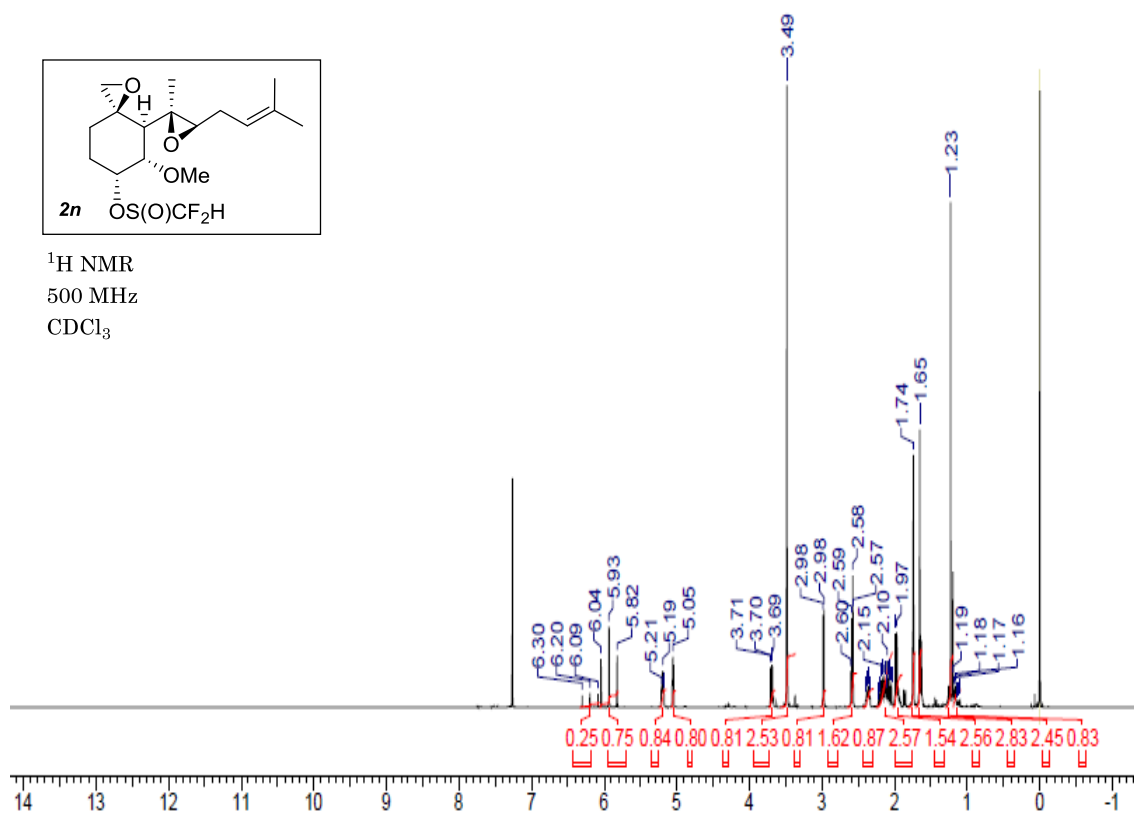

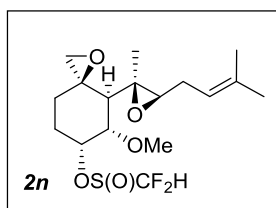

<sup>13</sup>C NMR  
126 MHz  
CDCl<sub>3</sub>

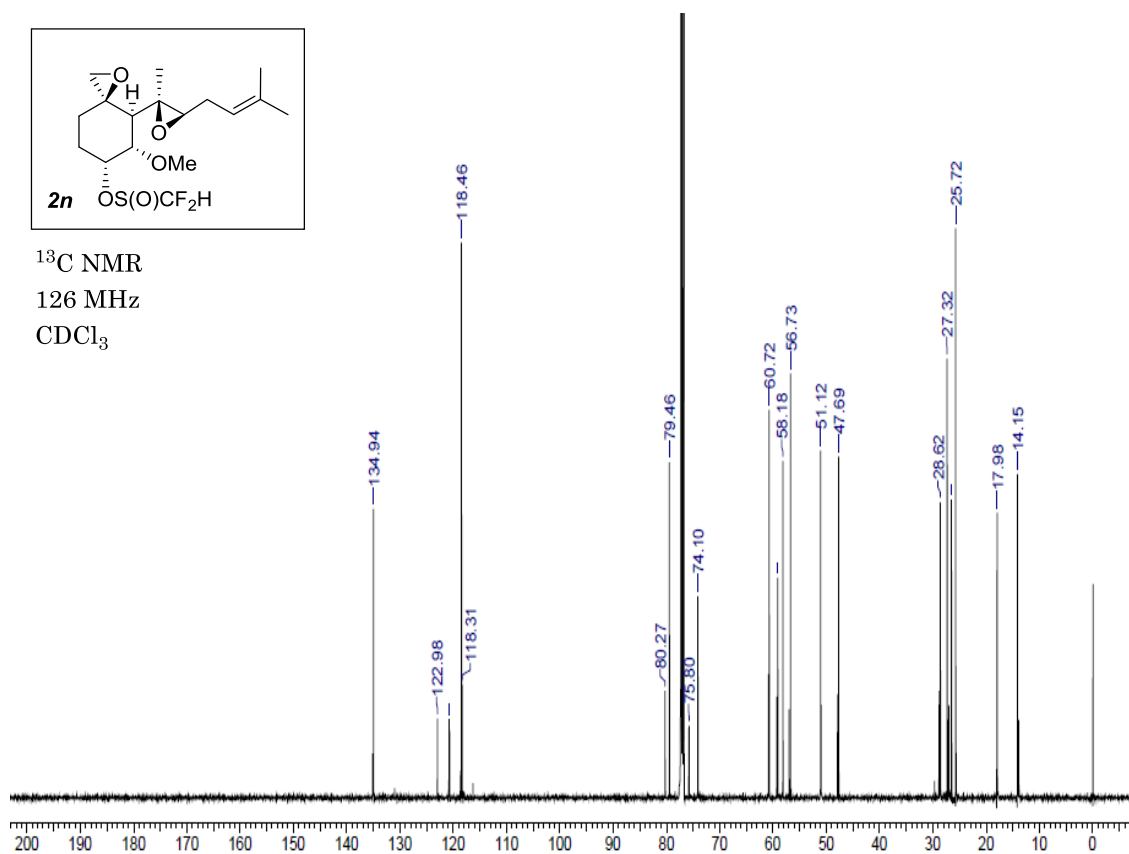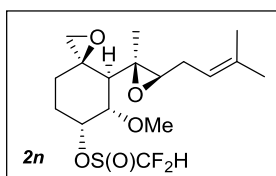

<sup>19</sup>F NMR  
282 MHz  
CDCl<sub>3</sub>

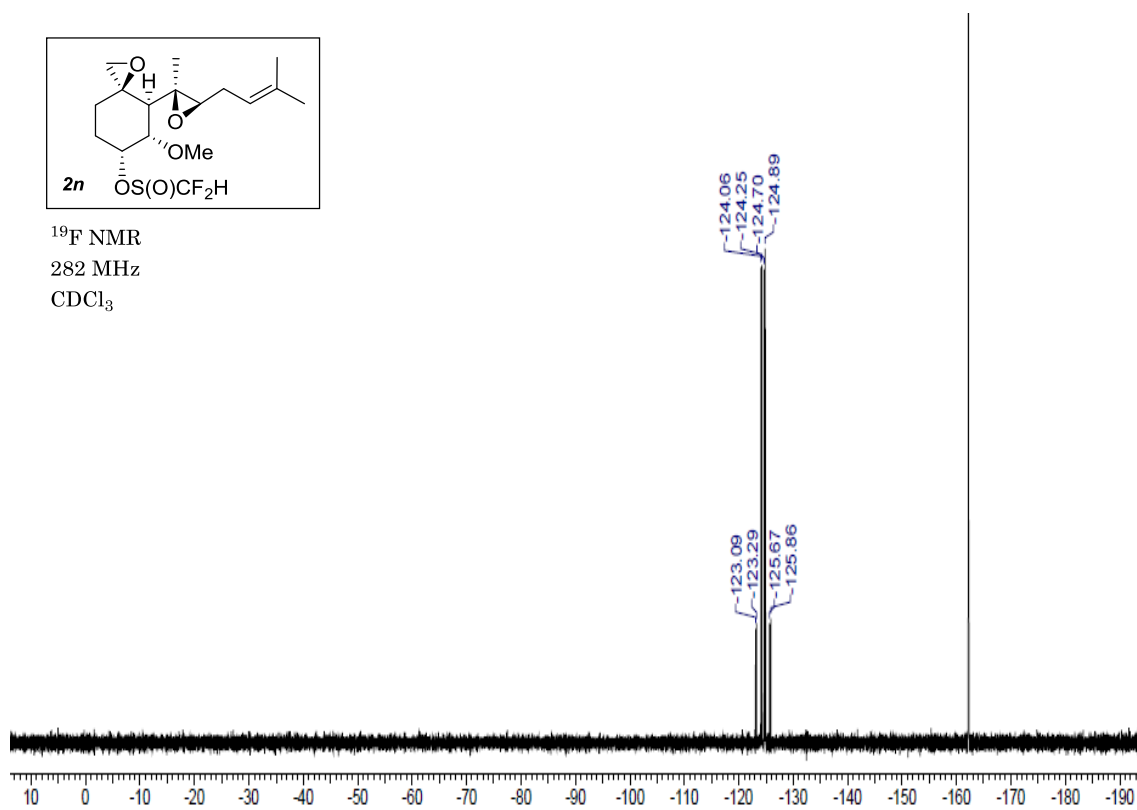

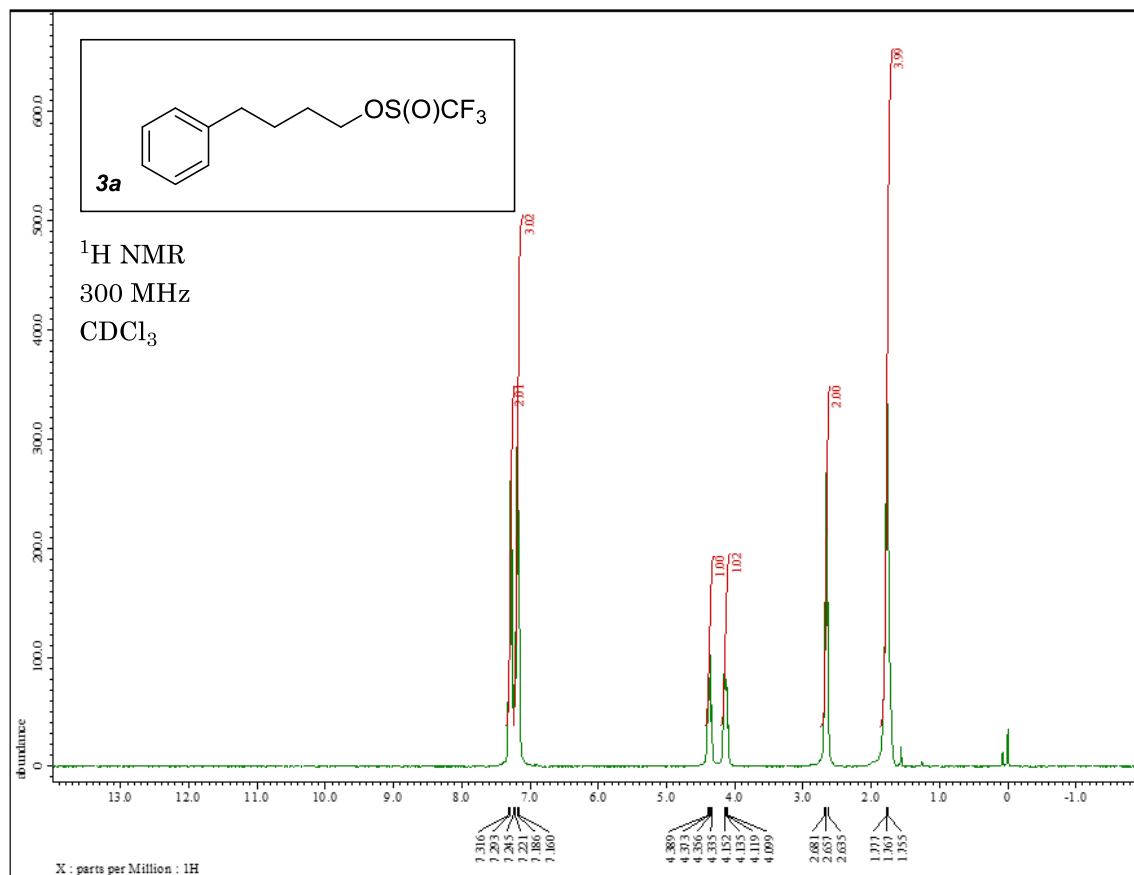

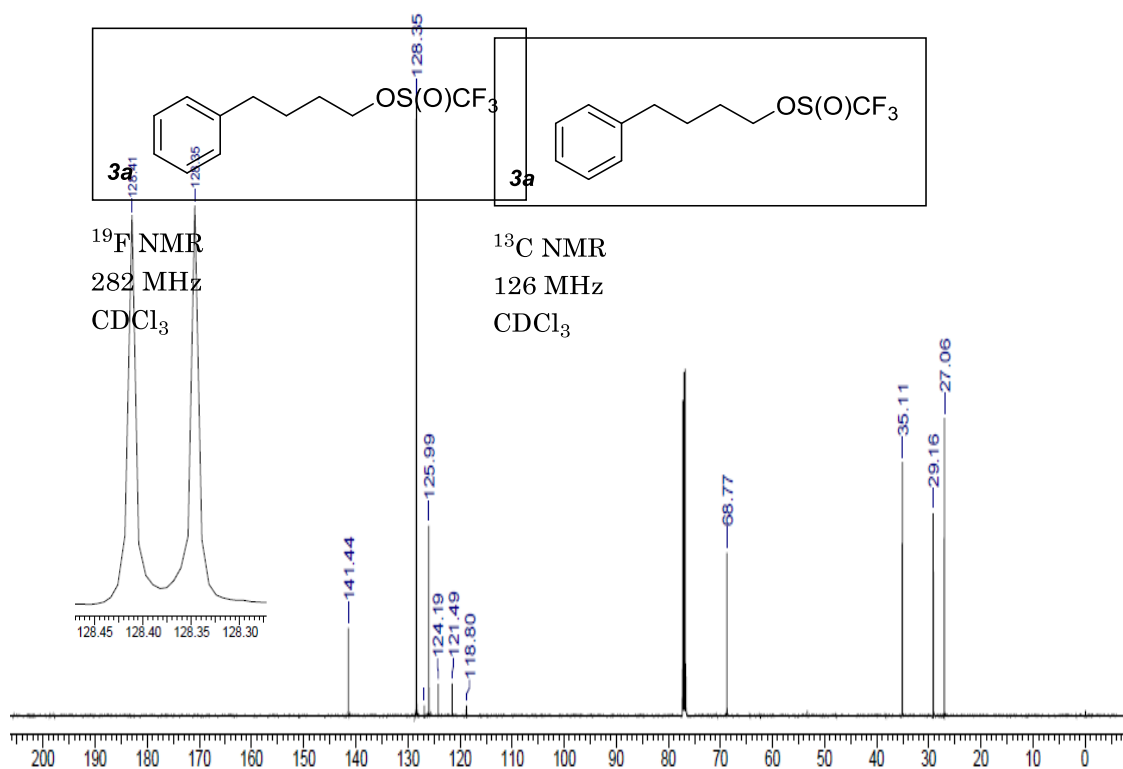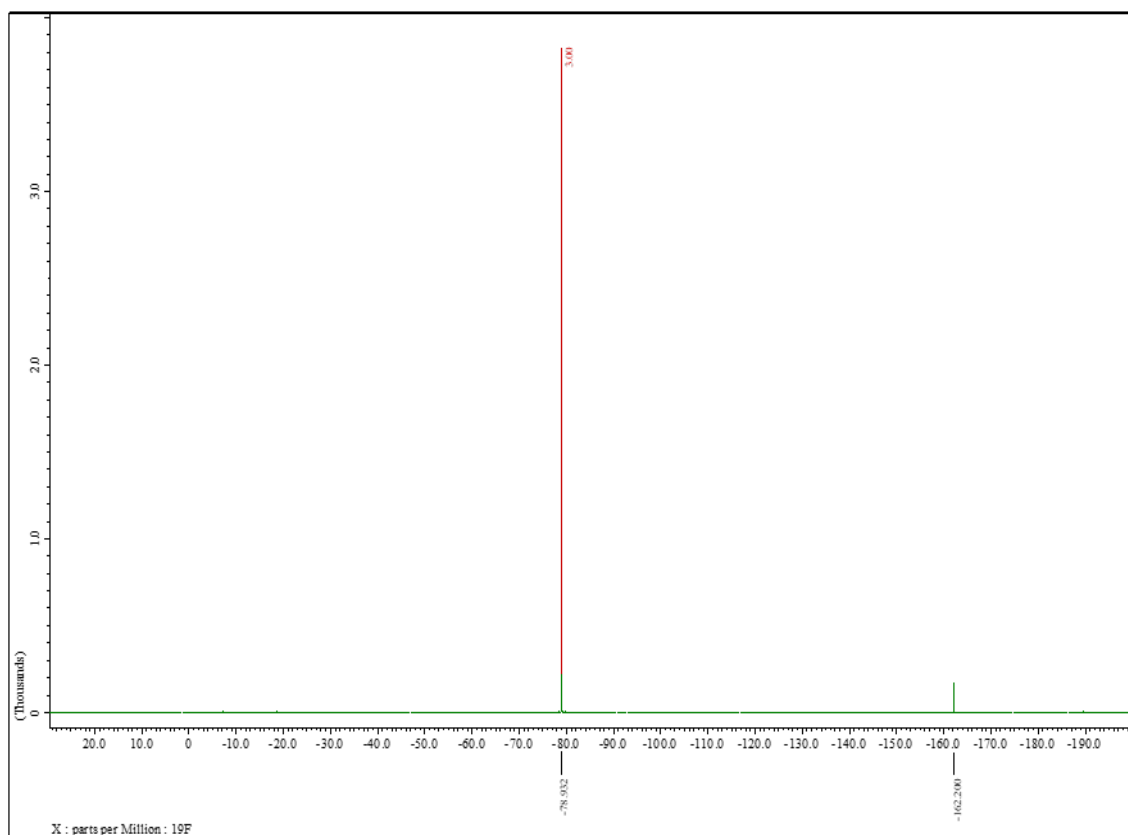

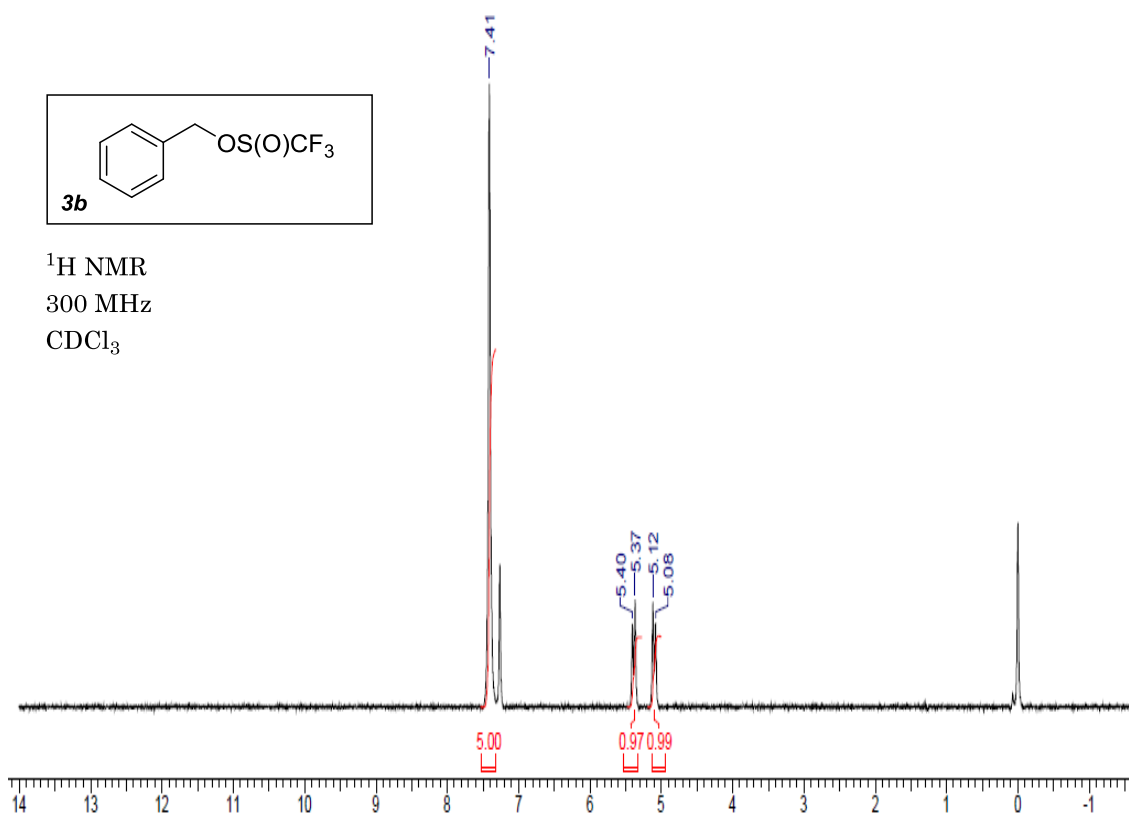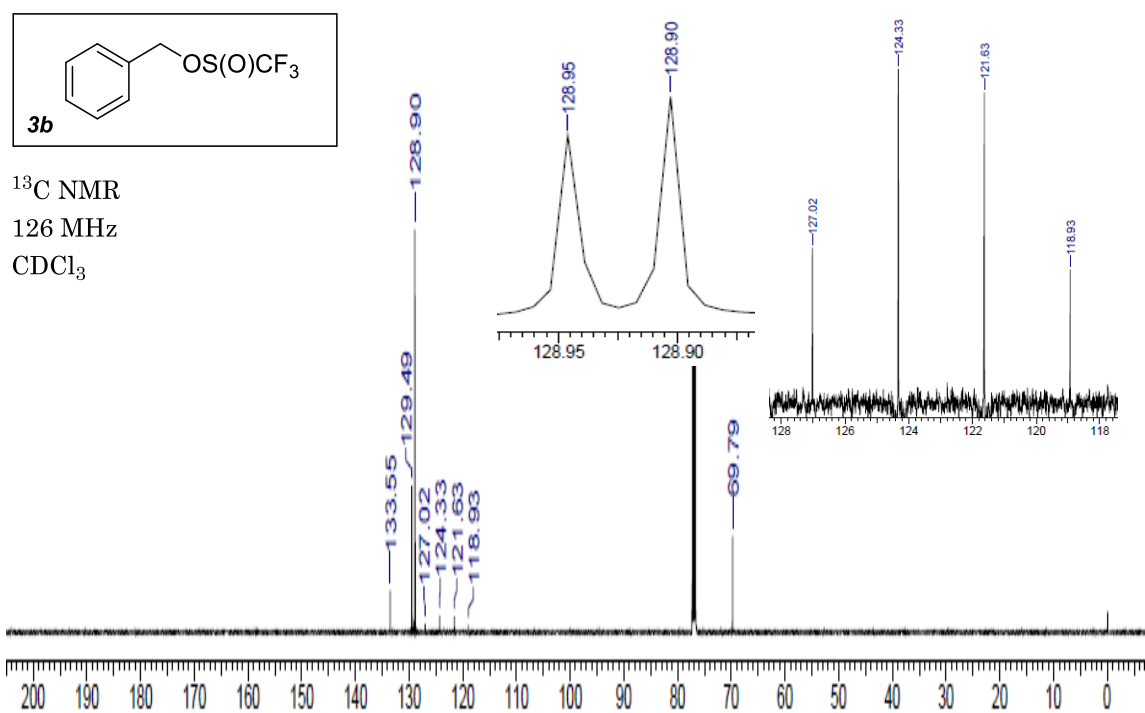

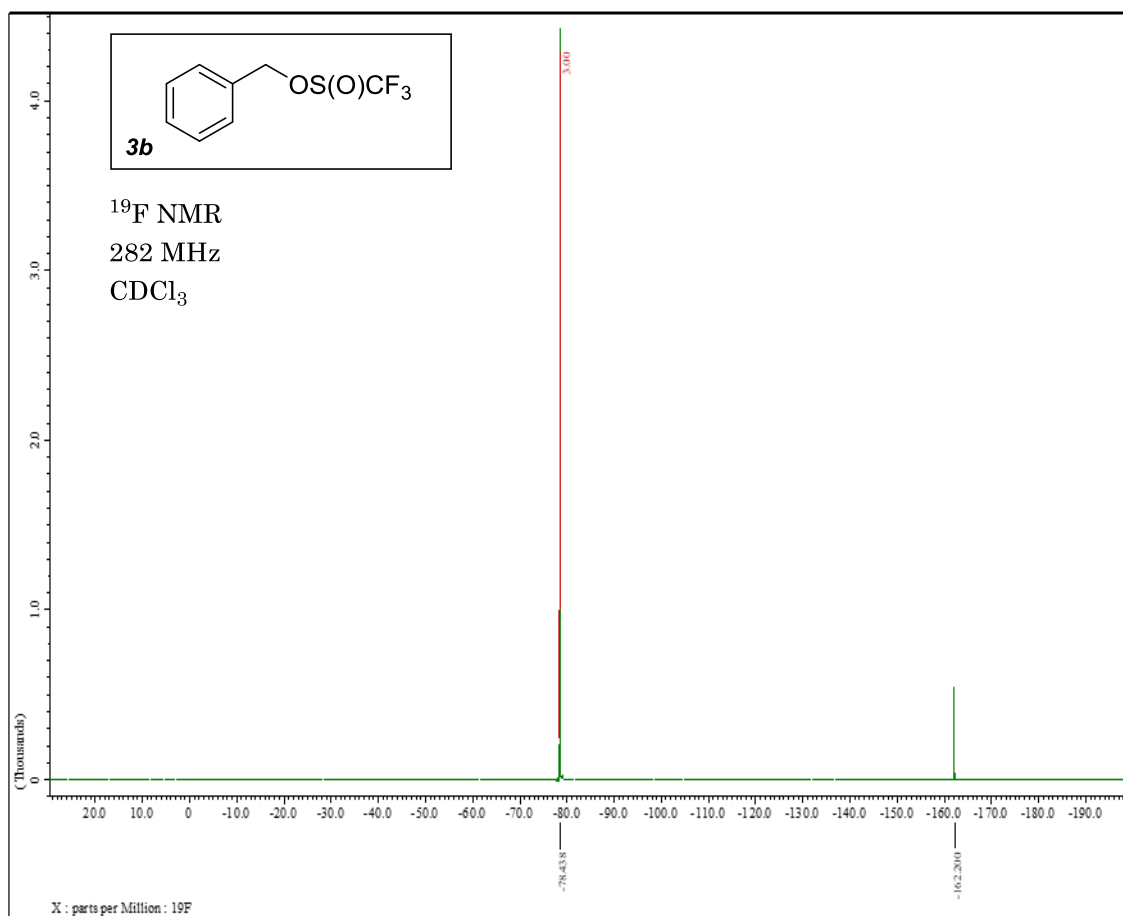

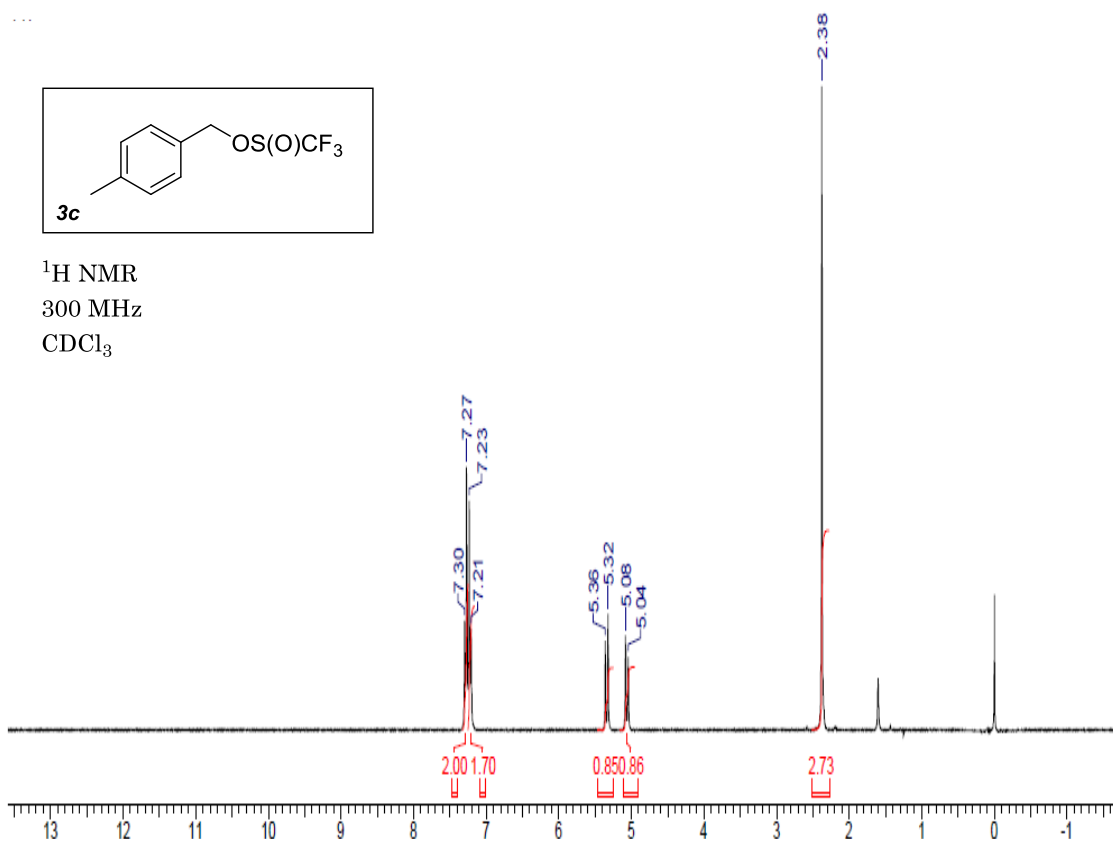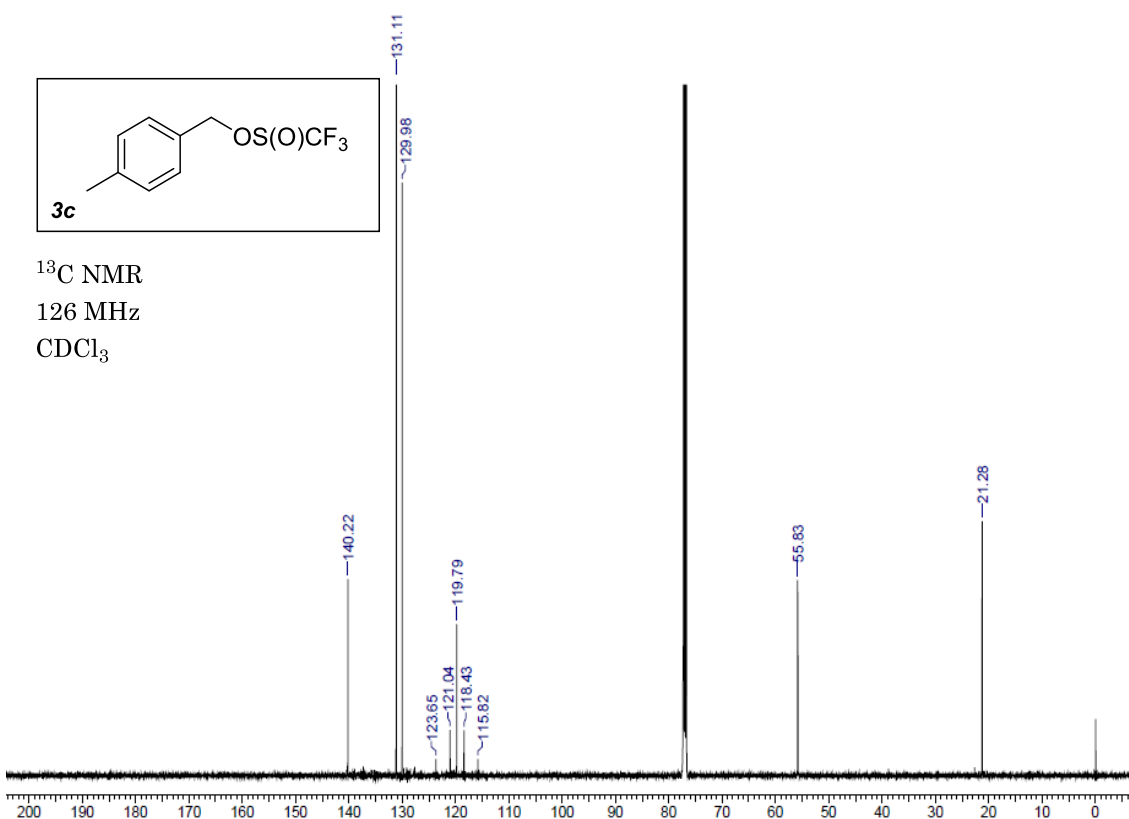

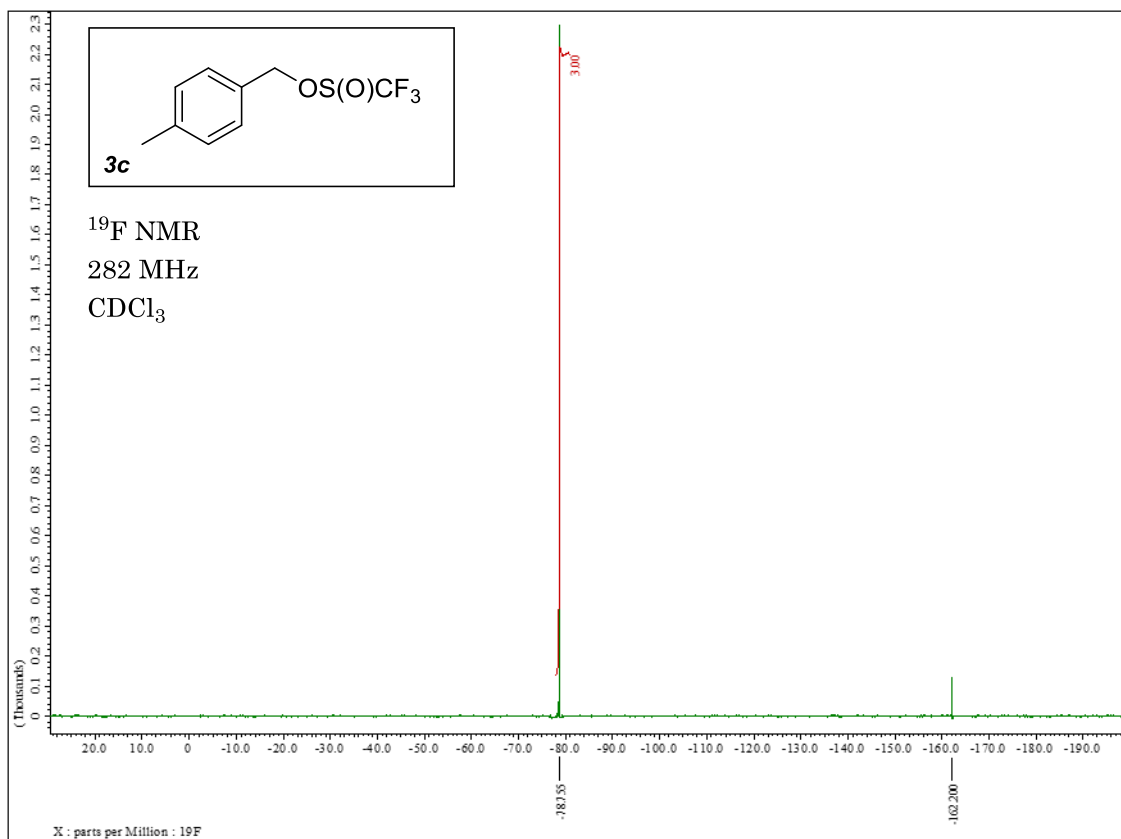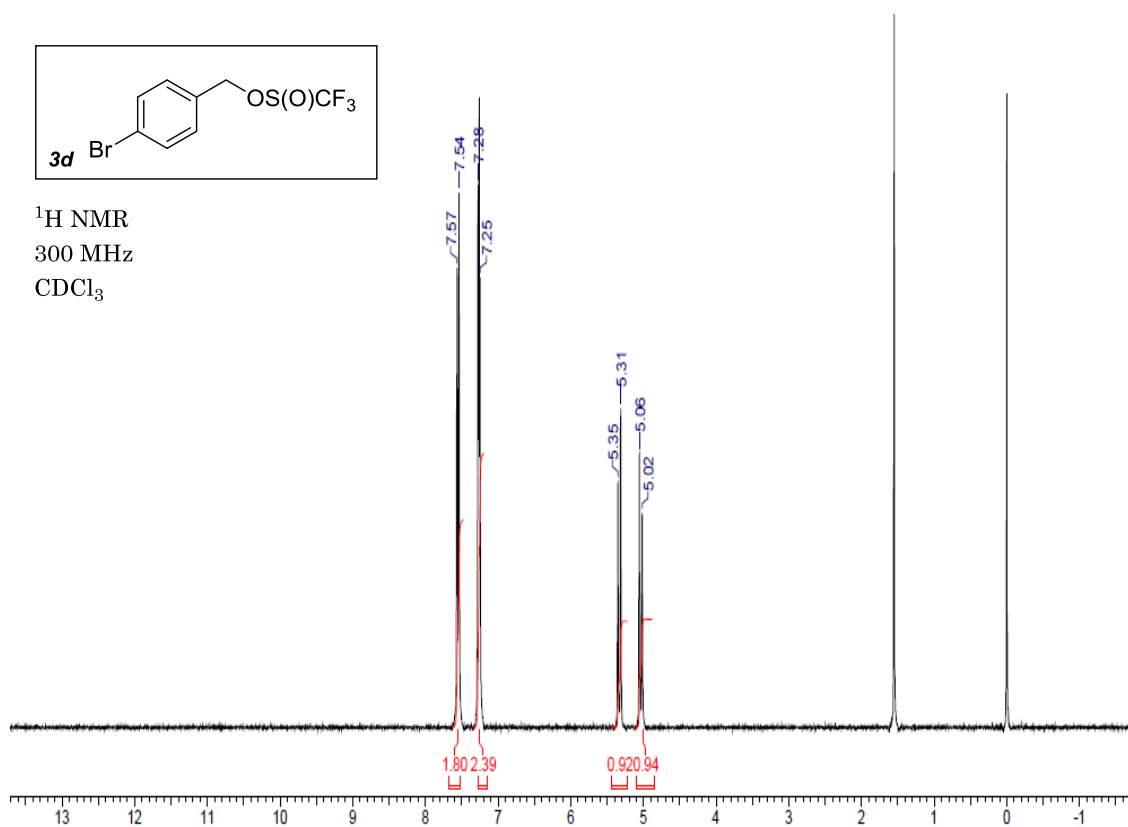



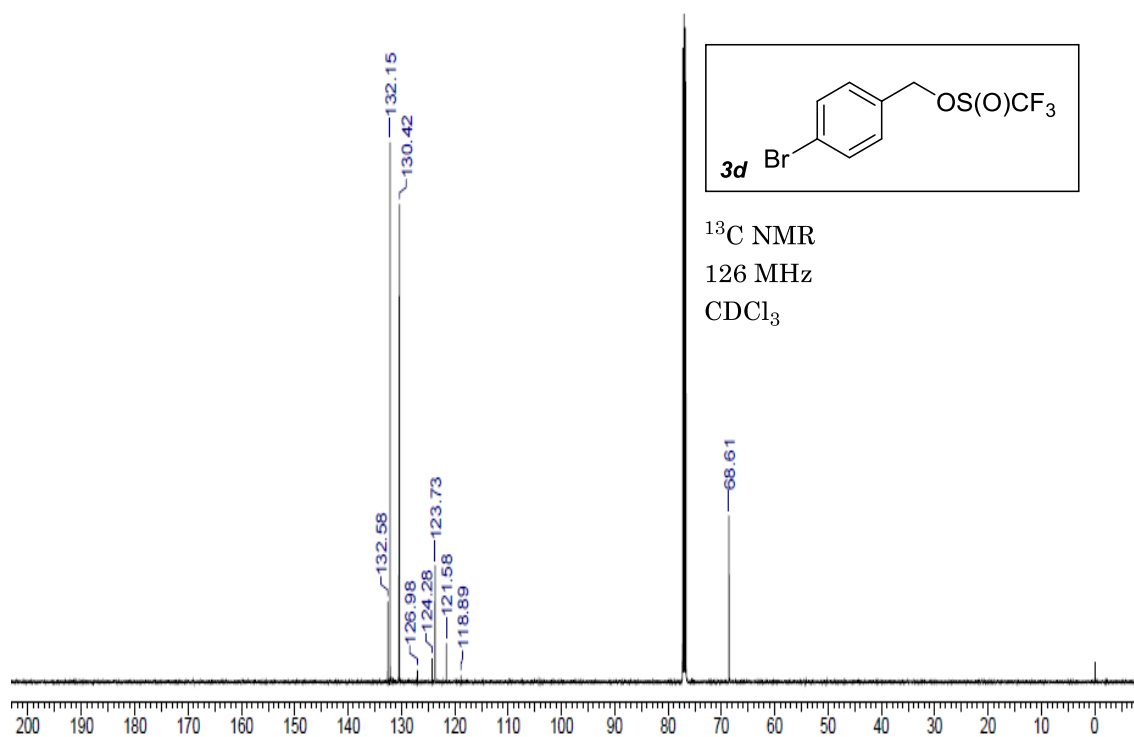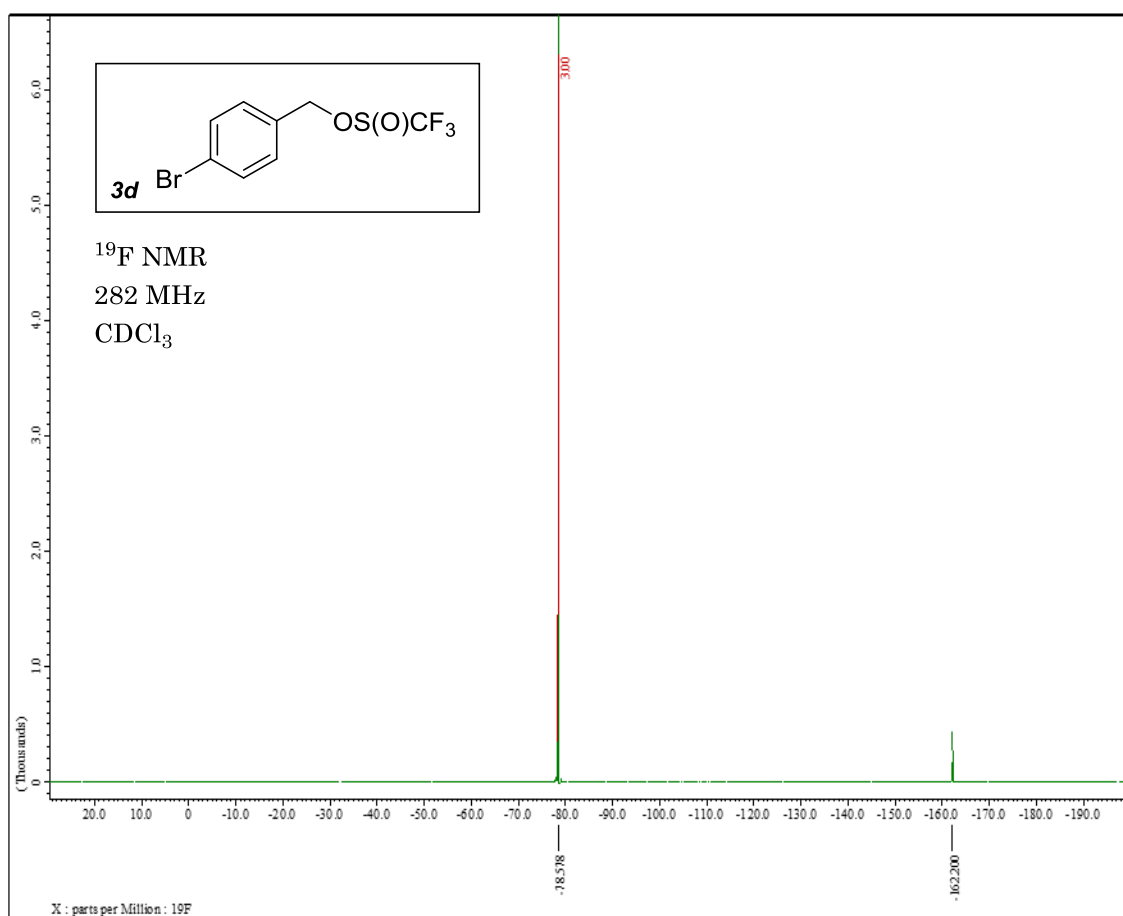

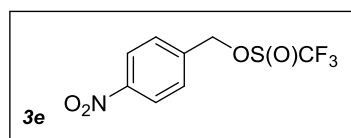

$^1\text{H}$  NMR  
300 MHz  
 $\text{CDCl}_3$

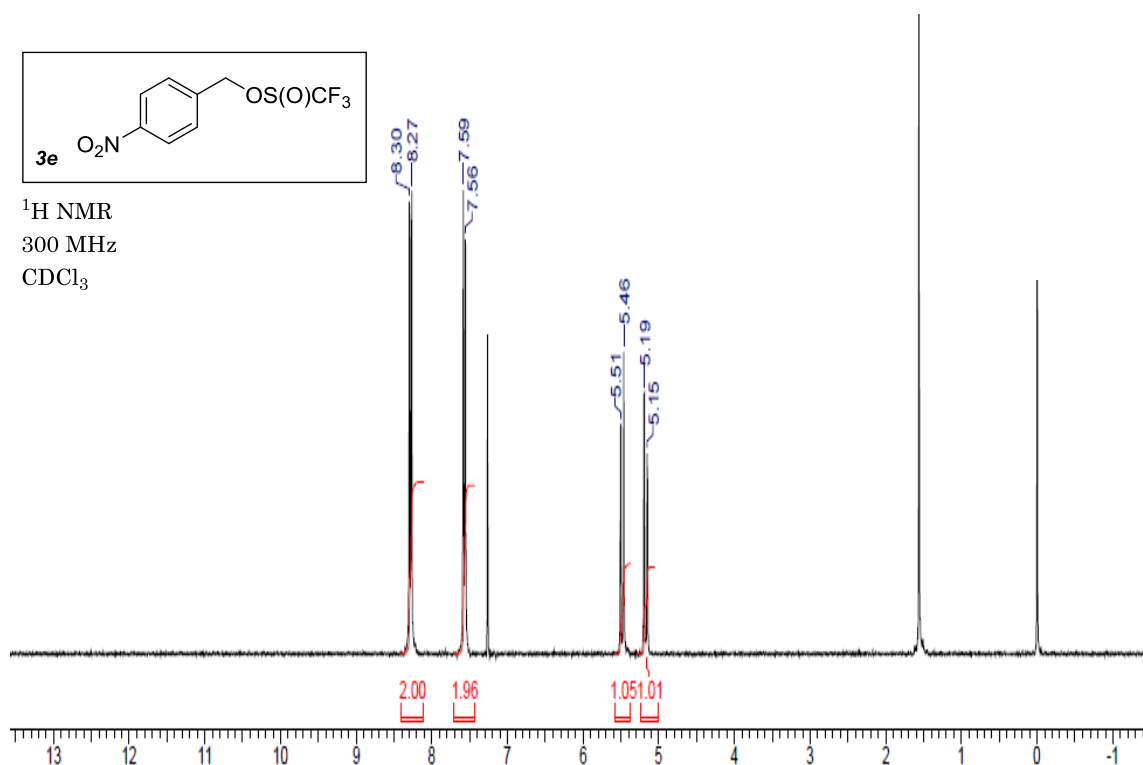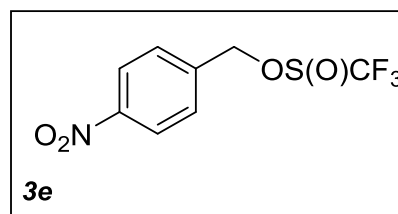

$^{13}\text{C}$  NMR  
126 MHz  
 $\text{CDCl}_3$

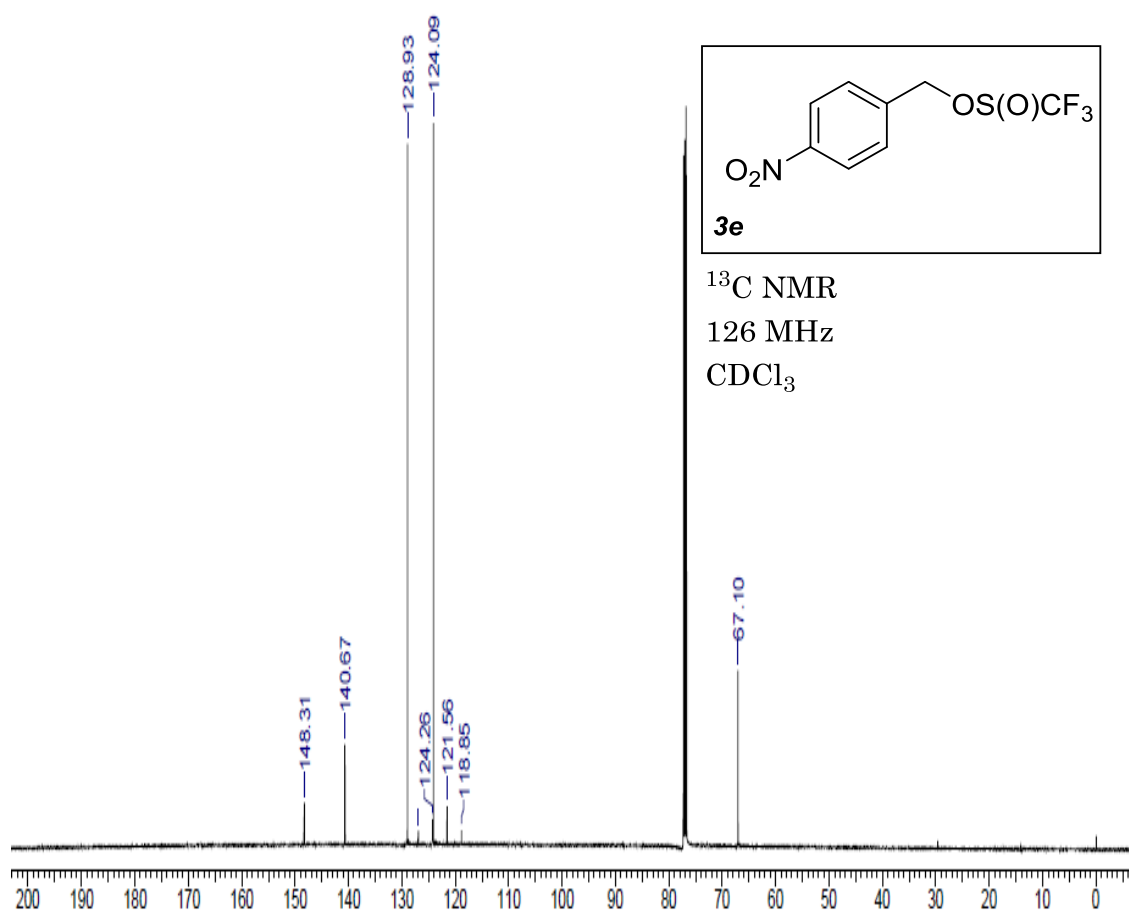

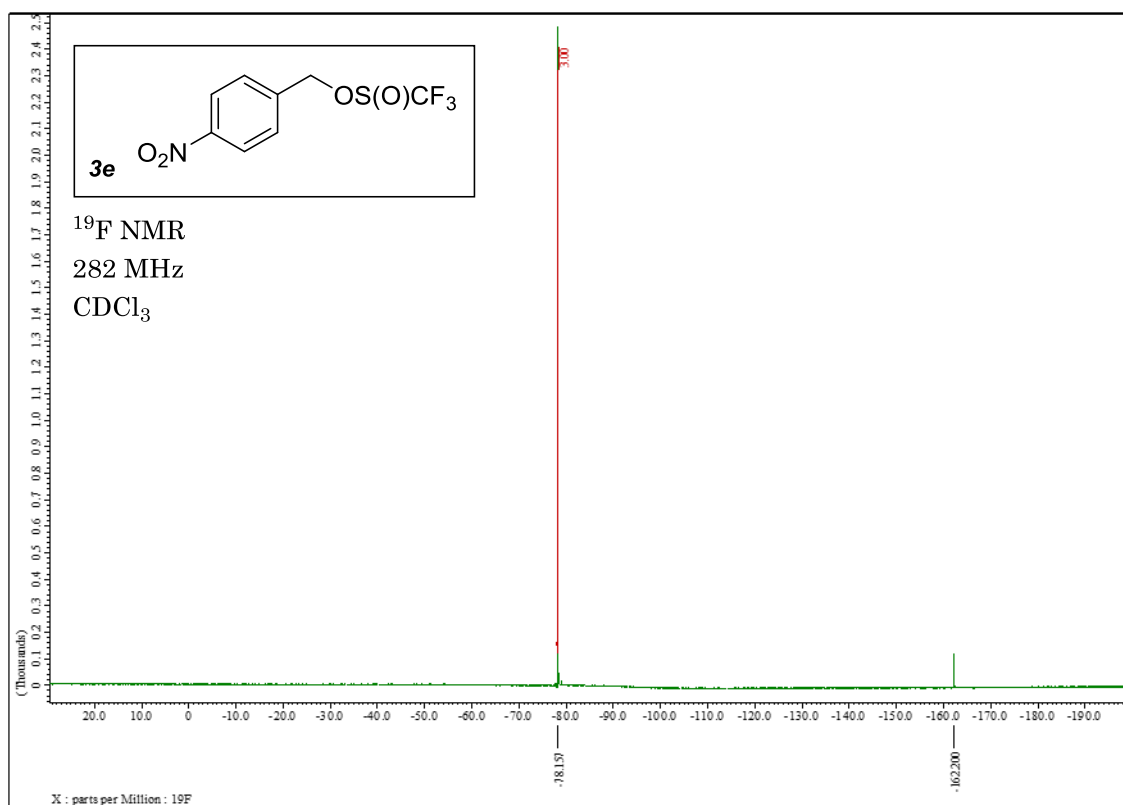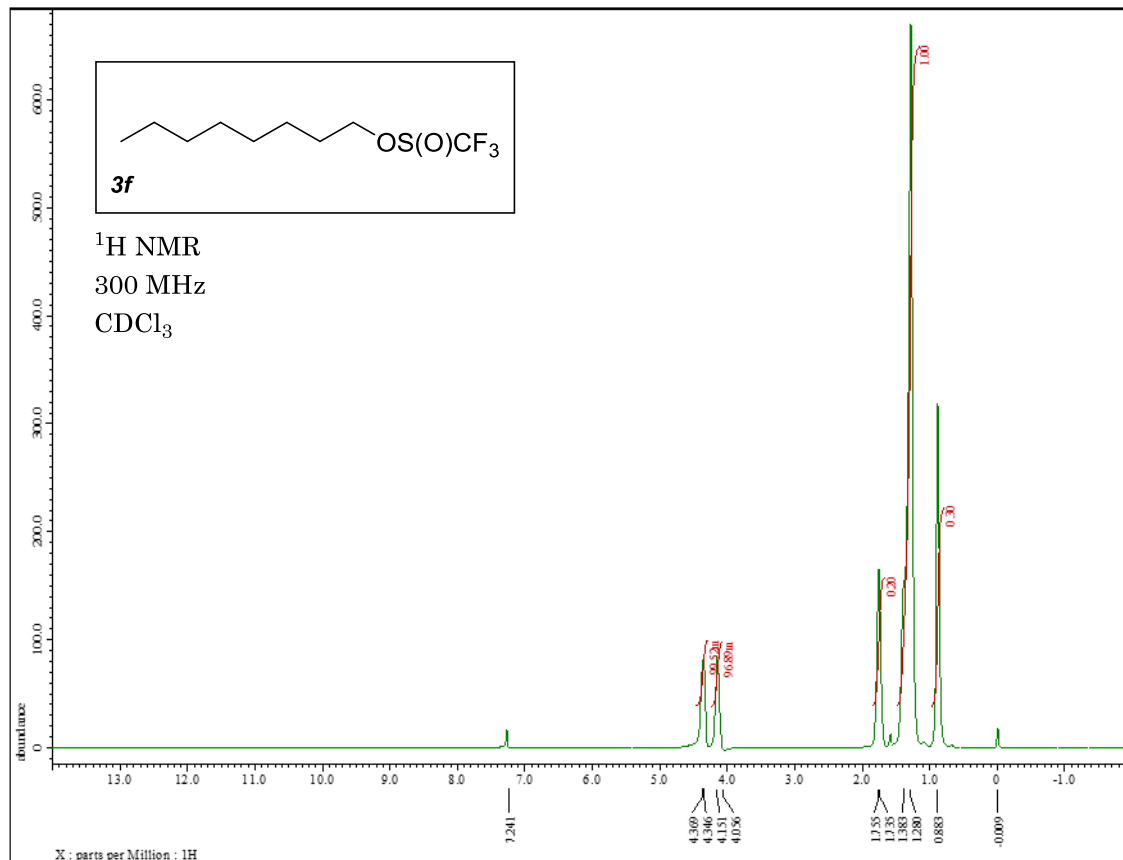

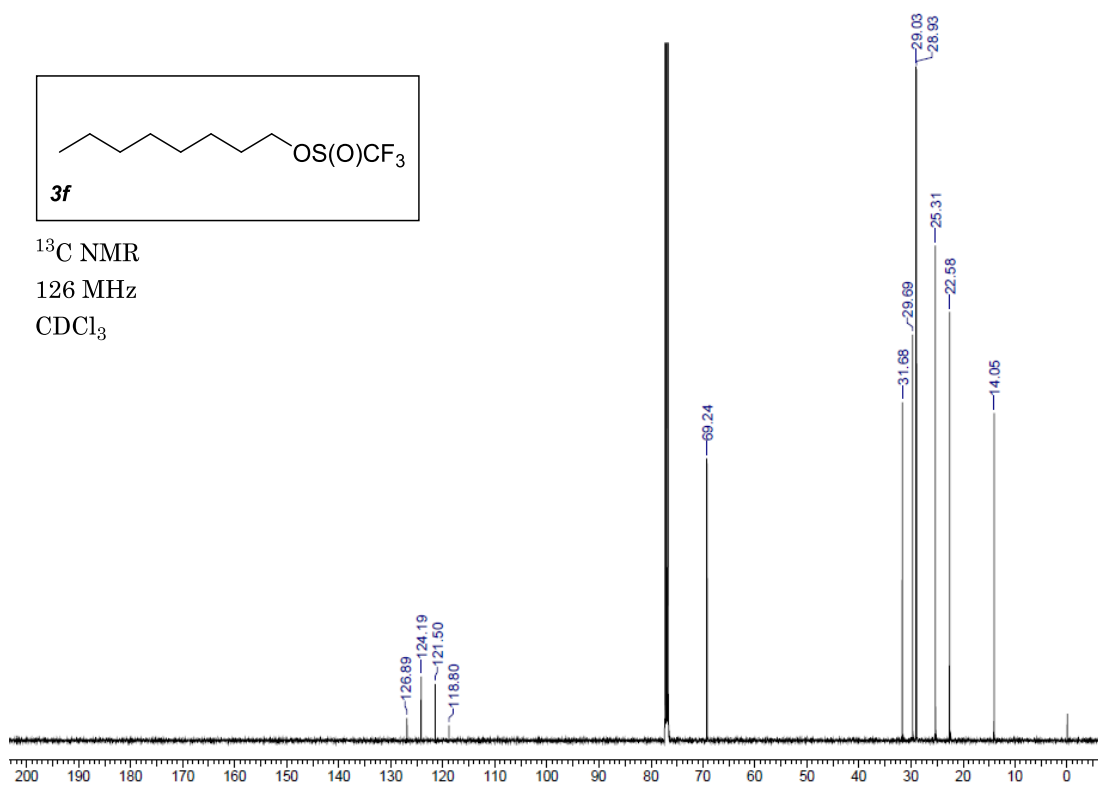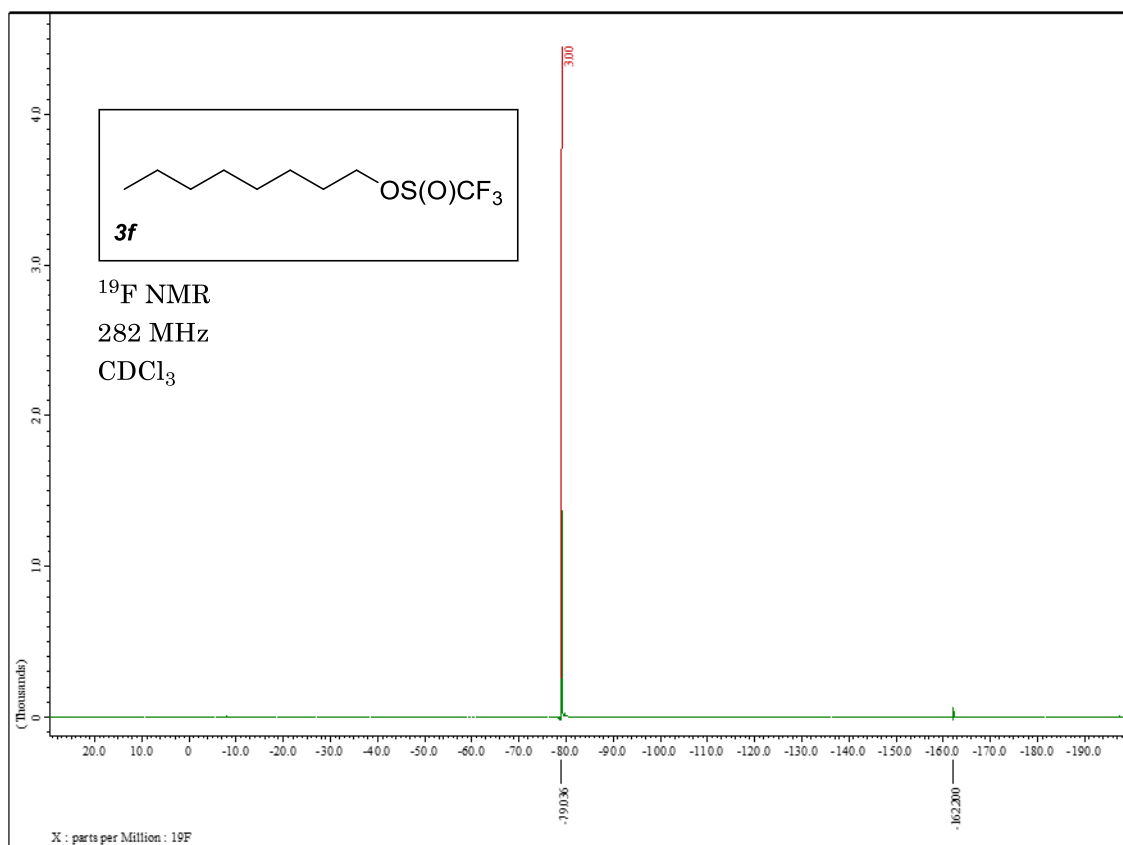

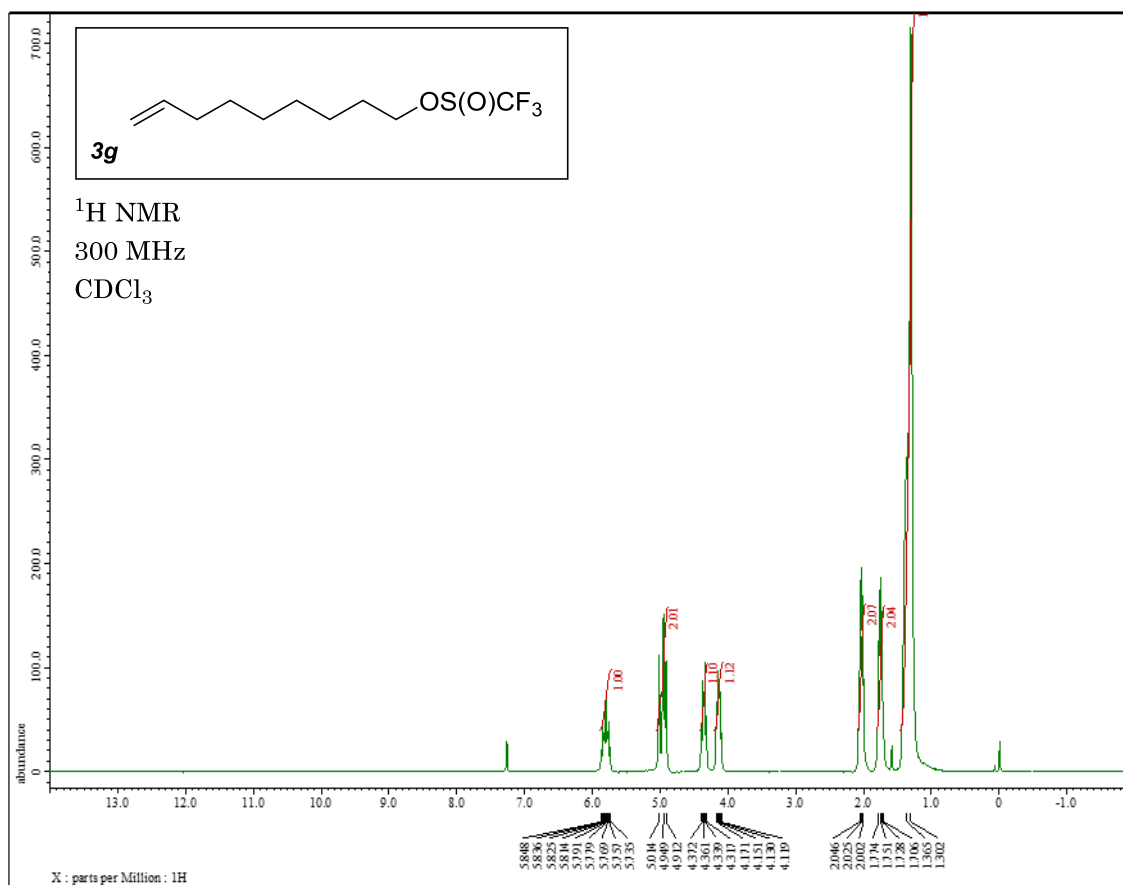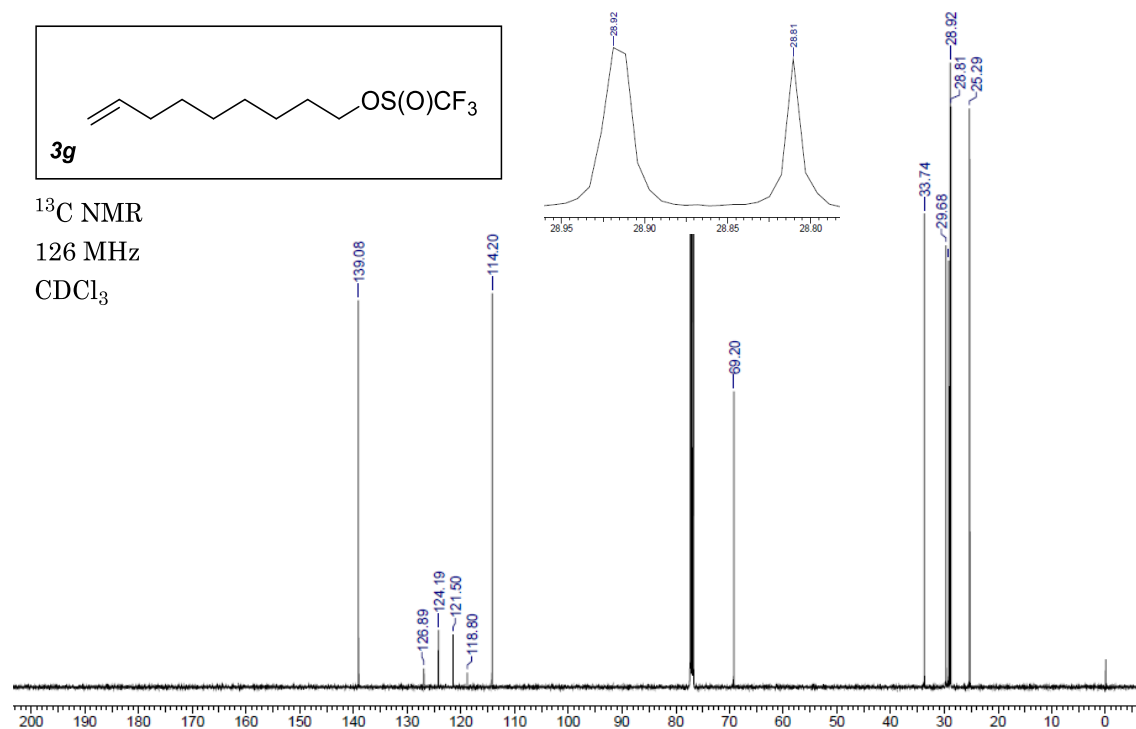

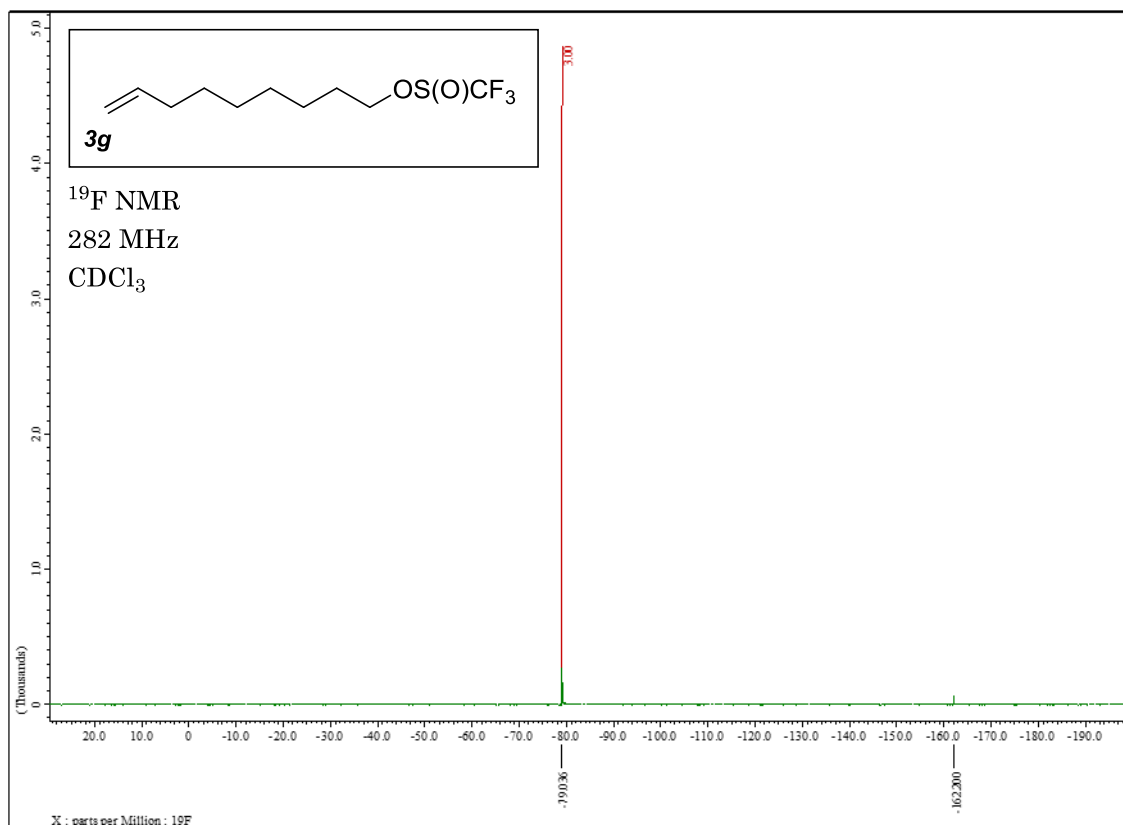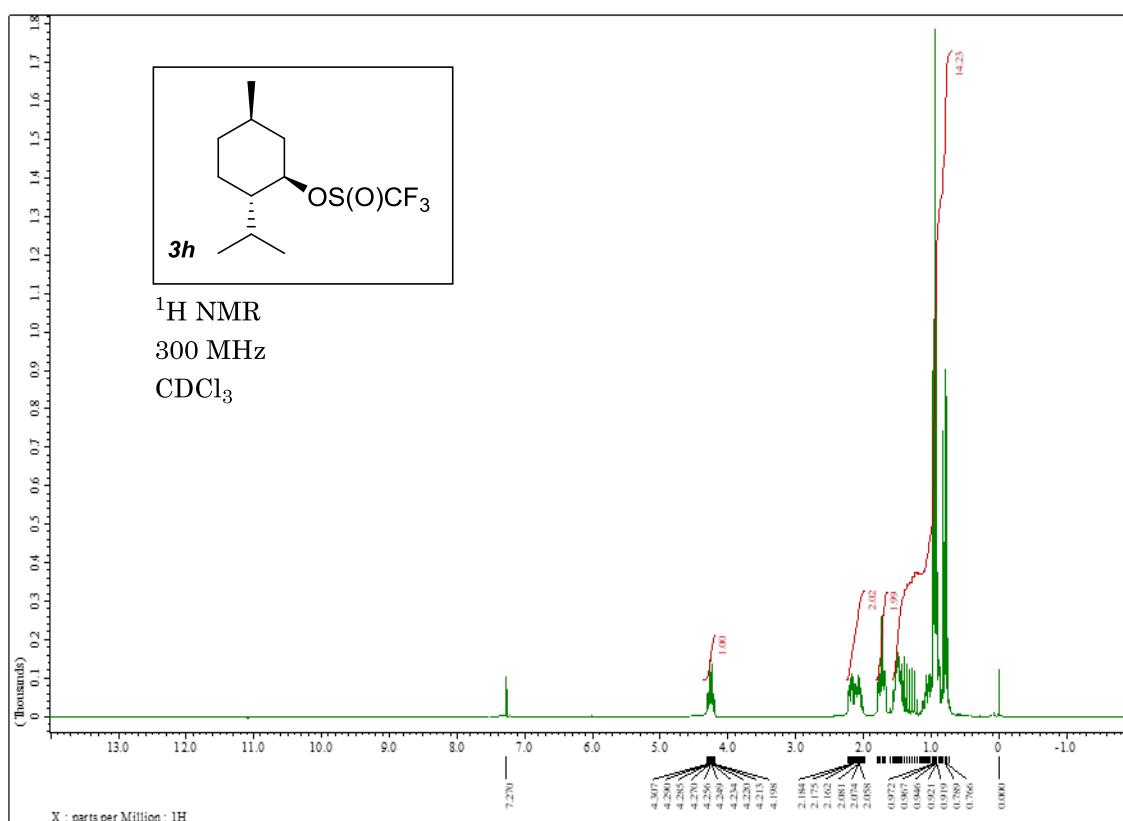

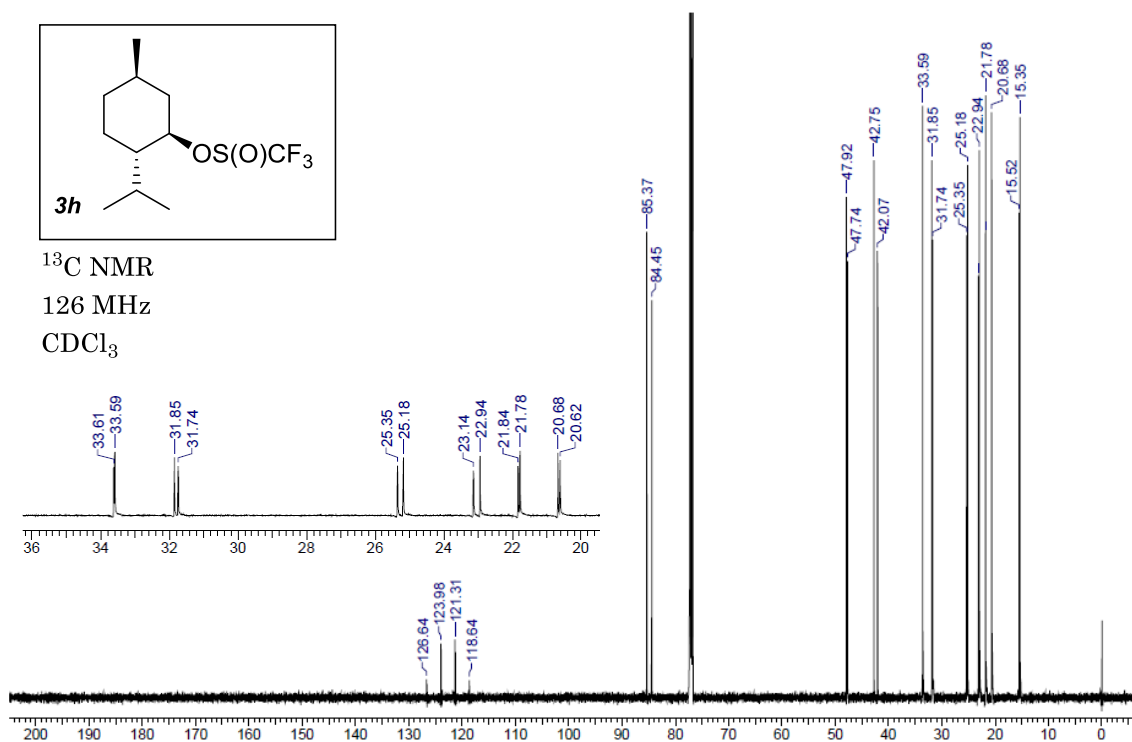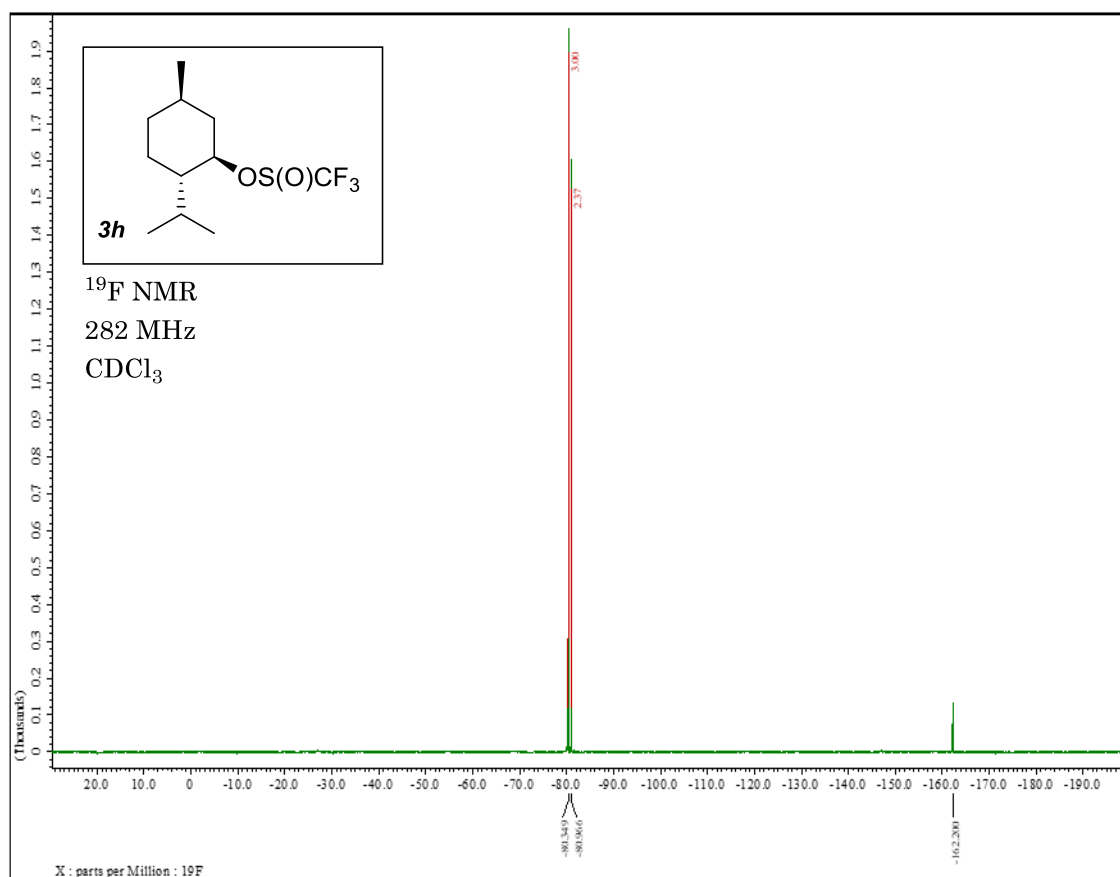

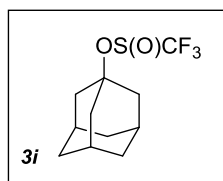

<sup>1</sup>H NMR  
300 MHz  
CDCl<sub>3</sub>

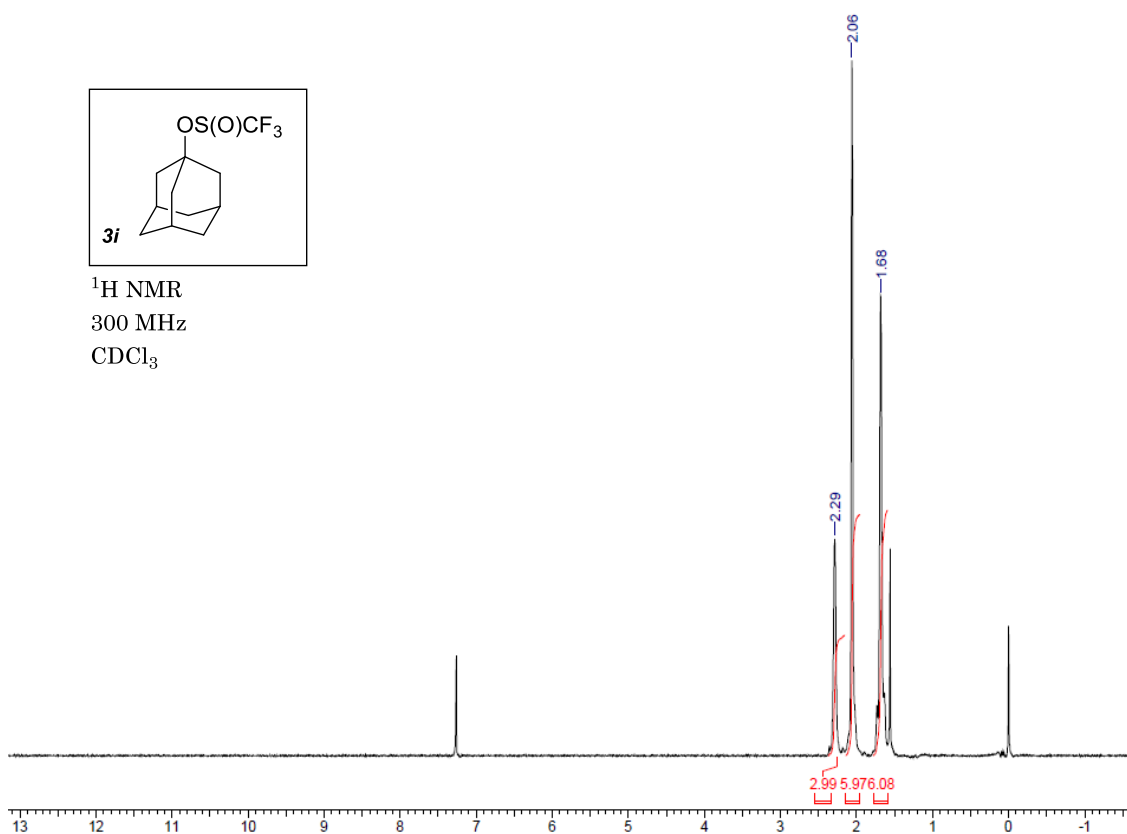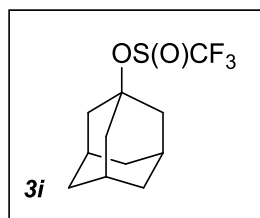

<sup>13</sup>C NMR  
126 MHz  
CDCl<sub>3</sub>

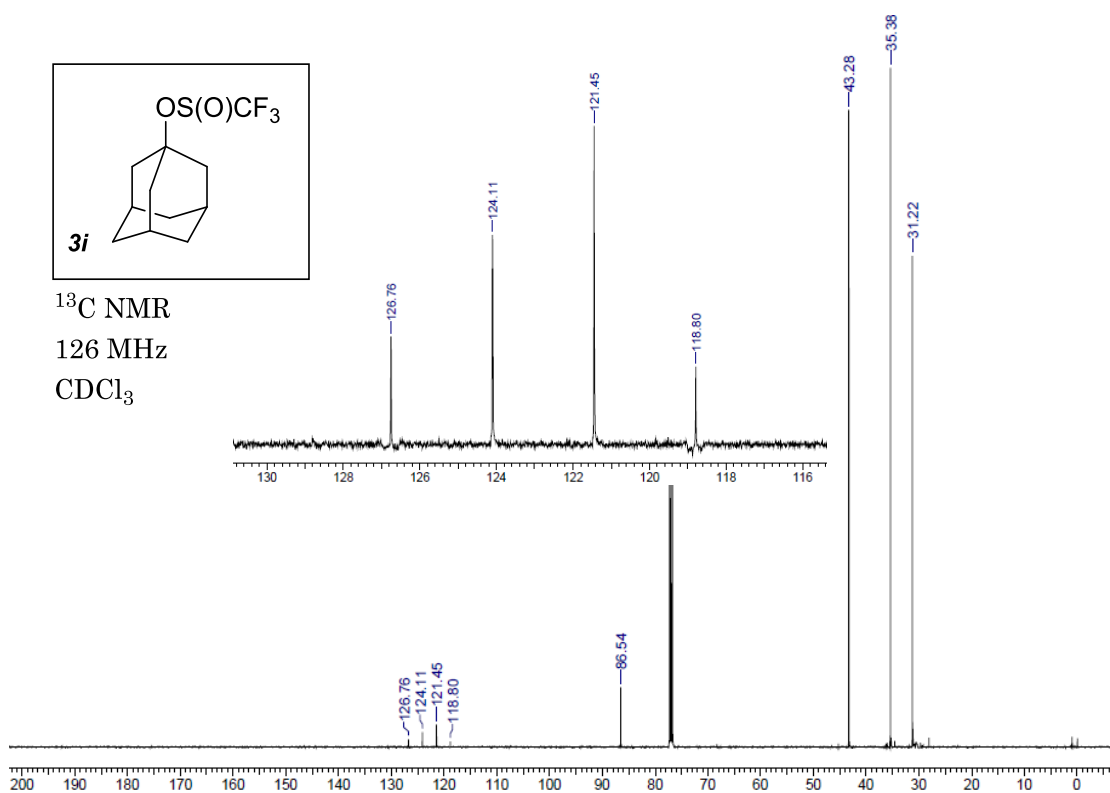



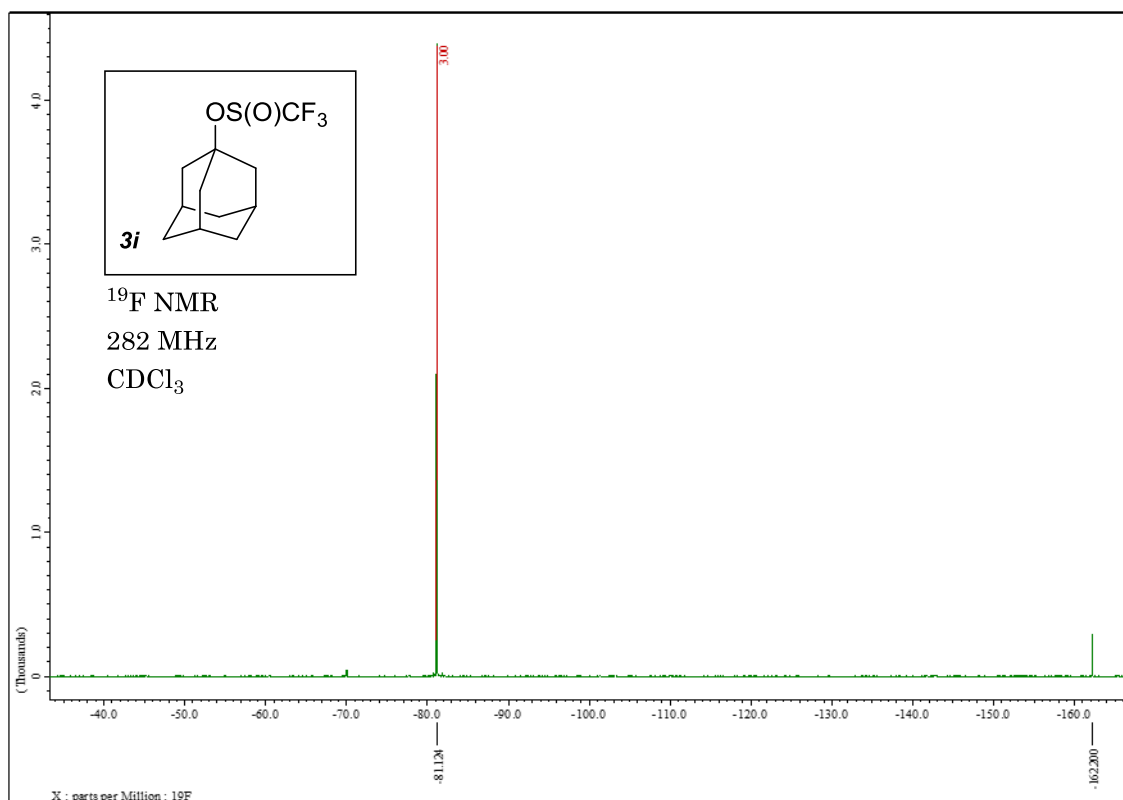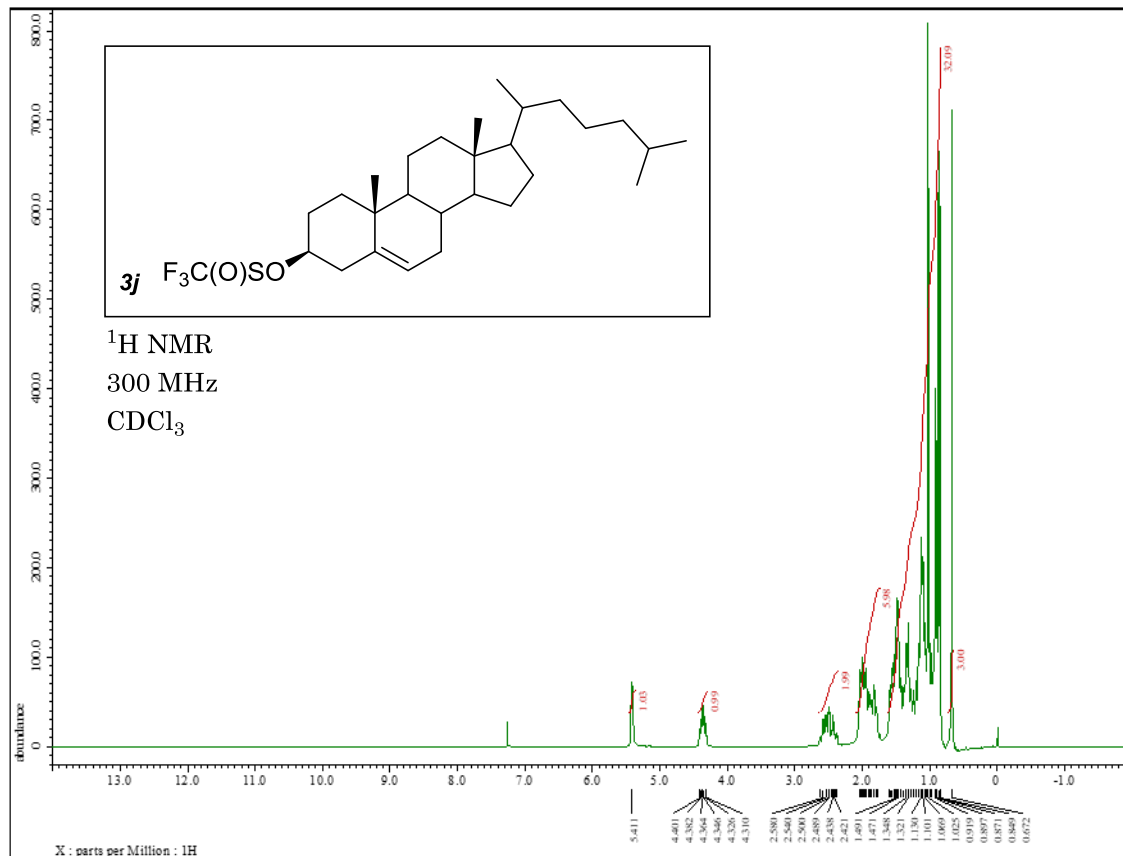

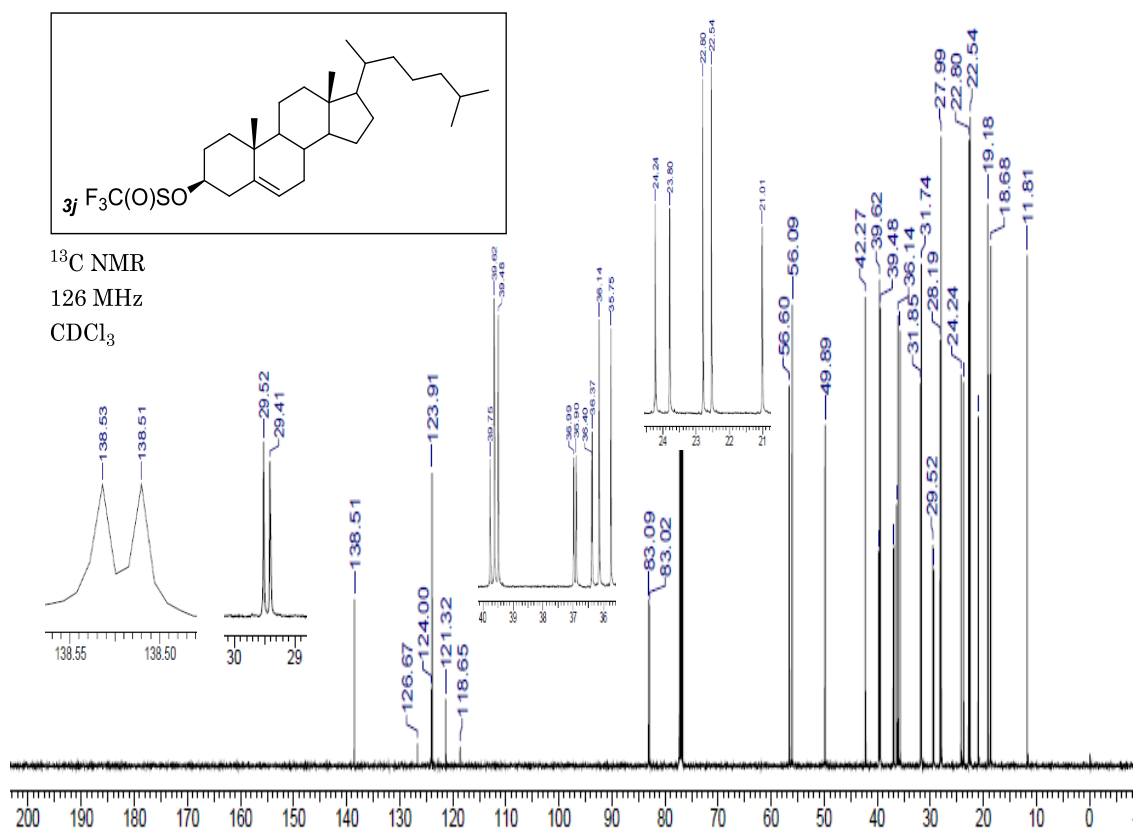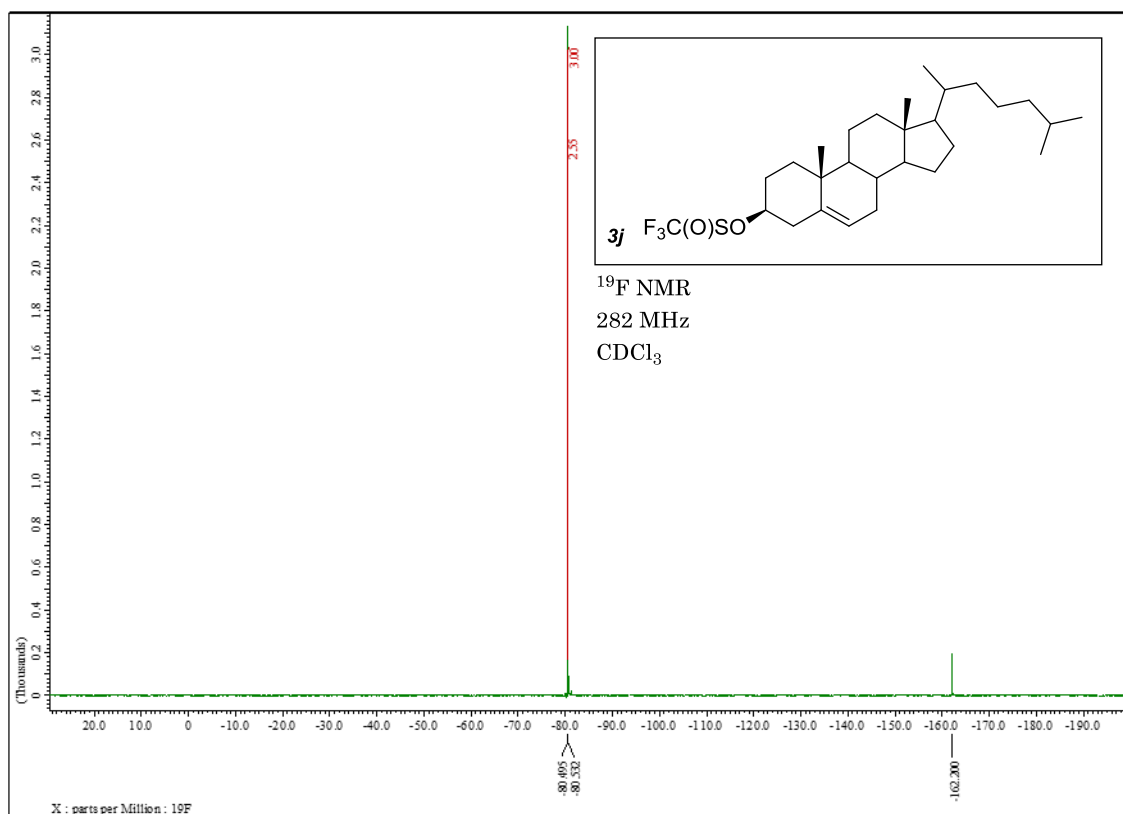

Supplement: Supplementary file 1 [file 26906526]
